# Supplementary material for: Unusual constituents from the medicinal mushroomGanoderma lingzhi
Source: Royal Society of Chemistry journal article supplement (doi:10.1039/c9ra08566a), 2019-01-01
Supplement: c9ra08566a1.pdf [file c9ra08566a1.pdf]

**Electronic Supplementary Information for**

## **Unusual Constituents from the Medicinal Mushroom**

### ***Ganoderma lingzhi***

Zhen-Zhu Zhao<sup>a,b</sup>, Xu-Bo Liang<sup>a</sup>, Wei-Sheng Feng<sup>a,b</sup>, Ya Wu<sup>a,b</sup>, Yan-Le Zhi<sup>a,b</sup>, Gui-Min Xue<sup>a,b</sup>, He-Ping Chen<sup>c,\*</sup>, Ji-Kai Liu<sup>c,\*</sup>

<sup>a</sup>College of Pharmacy, Henan University of Chinese Medicine, Zhengzhou 450046, China

<sup>b</sup>Collaborative Innovation Center for Respiratory Disease Diagnosis and Treatment and Chinese Medicine Development of Henan Province, Zhengzhou 450046, China

<sup>c</sup>School of Pharmaceutical Sciences, South-Central University for Nationalities, Wuhan 430074, China

#### **Corresponding Authors**

\*Tel/fax: +86-27-67841275. E-mail: [chenhp@mail.scuec.edu.cn](mailto:chenhp@mail.scuec.edu.cn) (H.-P. Chen)

\*Tel/fax: +86-27-67842267. E-mail: [jkliu@mail.kib.ac.cn](mailto:jkliu@mail.kib.ac.cn); [liujikai@mail.scuec.edu.cn](mailto:liujikai@mail.scuec.edu.cn) (J.-K. Liu)

## Contents

|                                                                                                              |    |
|--------------------------------------------------------------------------------------------------------------|----|
| 1 Crystal data of compounds <b>2</b> and <b>5</b> .....                                                      | 4  |
| Table 1S. Crystal data and structure refinement for Cu_2_0m.....                                             | 4  |
| Table 2S. Crystal data and structure refinement for Cu_5_0m.....                                             | 5  |
| 2. Supplementary Figures.....                                                                                | 6  |
| Figure 1S. <sup>1</sup> H NMR spectrum of <b>1</b> (600 MHz, CD <sub>3</sub> OD).....                        | 6  |
| Figure 2S. <sup>13</sup> C NMR and DEPT spectra of <b>1</b> (150 MHz, CD <sub>3</sub> OD).....               | 7  |
| Figure 3S. HSQC spectrum of <b>1</b> (CD <sub>3</sub> OD).....                                               | 8  |
| Figure 4S. <sup>1</sup> H- <sup>1</sup> H COSY spectrum of <b>1</b> (CD <sub>3</sub> OD).....                | 9  |
| Figure 5S. HMBC spectrum of <b>1</b> (CD <sub>3</sub> OD).....                                               | 10 |
| Figure 6S. ROESY spectrum of <b>1</b> (CD <sub>3</sub> OD).....                                              | 11 |
| Figure 7S. HREIMS (+) report of <b>1</b> .....                                                               | 12 |
| Figure 8S. <sup>1</sup> H NMR spectrum of <b>2</b> (600 MHz, CDCl <sub>3</sub> ).....                        | 13 |
| Figure 9S. <sup>13</sup> C NMR and DEPT spectra of <b>2</b> (150 MHz, CDCl <sub>3</sub> ).....               | 14 |
| Figure 10S. HSQC spectrum of <b>2</b> (CDCl <sub>3</sub> ).....                                              | 15 |
| Figure 11S. <sup>1</sup> H- <sup>1</sup> H COSY spectrum of <b>2</b> (CDCl <sub>3</sub> ).....               | 16 |
| Figure 12S. HMBC spectrum of <b>2</b> (CDCl <sub>3</sub> ).....                                              | 17 |
| Figure 13S. ROESY spectrum of <b>2</b> (CDCl <sub>3</sub> ).....                                             | 18 |
| Figure 14S. HREIMS (+) report of <b>2</b> .....                                                              | 19 |
| Figure 15S. <sup>1</sup> H NMR spectrum of <b>3</b> (600 MHz, CDCl <sub>3</sub> ).....                       | 20 |
| Figure 16S. <sup>13</sup> C NMR and DEPT spectra of <b>3</b> (150 MHz, CDCl <sub>3</sub> ).....              | 21 |
| Figure 17S. HSQC spectrum of <b>3</b> (CDCl <sub>3</sub> ).....                                              | 22 |
| Figure 18S. <sup>1</sup> H- <sup>1</sup> H COSY spectrum of <b>3</b> (CDCl <sub>3</sub> ).....               | 23 |
| Figure 19S. HMBC spectrum of <b>3</b> (CDCl <sub>3</sub> ).....                                              | 24 |
| Figure 20S. ROESY spectrum of <b>3</b> (CDCl <sub>3</sub> ).....                                             | 25 |
| Figure 21S. HRESIMS (+) report of <b>3</b> .....                                                             | 26 |
| Figure 22S. <sup>1</sup> H NMR spectrum of <b>4</b> (600 MHz, CD <sub>3</sub> OD).....                       | 27 |
| Figure 23S. <sup>13</sup> C NMR and DEPT spectra of <b>4</b> (150 MHz, CD <sub>3</sub> OD).....              | 28 |
| Figure 24S. HSQC spectrum of <b>4</b> (CD <sub>3</sub> OD).....                                              | 29 |
| Figure 25S. <sup>1</sup> H- <sup>1</sup> H COSY spectrum of <b>4</b> (CD <sub>3</sub> OD).....               | 31 |
| Figure 26S. HMBC spectrum of <b>4</b> (CD <sub>3</sub> OD).....                                              | 32 |
| Figure 27S. ROESY spectrum of <b>4</b> (CD <sub>3</sub> OD).....                                             | 33 |
| Figure 28S. HRESIMS (+) report of <b>4</b> .....                                                             | 34 |
| Figure 29S. <sup>1</sup> H NMR spectrum of <b>5</b> (600 MHz, CD <sub>3</sub> OD).....                       | 35 |
| Figure 30S. <sup>13</sup> C NMR and DEPT spectra of <b>5</b> (150 MHz, CD <sub>3</sub> OD).....              | 36 |
| Figure 31S. HSQC spectrum of <b>5</b> (CD <sub>3</sub> OD).....                                              | 37 |
| Figure 32S. <sup>1</sup> H- <sup>1</sup> H COSY spectrum of <b>5</b> (CD <sub>3</sub> OD).....               | 38 |
| Figure 33S. HMBC spectrum of <b>5</b> (CD <sub>3</sub> OD).....                                              | 39 |
| Figure 34S. ROESY spectrum of <b>5</b> (CD <sub>3</sub> OD).....                                             | 40 |
| Figure 35S. HRESIMS (+) report of <b>5</b> .....                                                             | 41 |
| Figure 36S. <sup>1</sup> H NMR spectrum of <b>6</b> and <b>7</b> (600 MHz, CDCl <sub>3</sub> ).....          | 41 |
| Figure 37S. <sup>13</sup> C NMR and DEPT spectra of <b>6</b> and <b>7</b> (150 MHz, CDCl <sub>3</sub> )..... | 43 |
| Figure 38S. HSQC spectrum of <b>6</b> and <b>7</b> (CDCl <sub>3</sub> ).....                                 | 44 |

|                                                                                                                                 |    |
|---------------------------------------------------------------------------------------------------------------------------------|----|
| Figure 39S. $^1\text{H}$ - $^1\text{H}$ COSY spectrum of <b>6</b> and <b>7</b> ( $\text{CDCl}_3$ ).....                         | 45 |
| Figure 40S. HMBC spectrum of <b>6</b> and <b>7</b> ( $\text{CDCl}_3$ ) .....                                                    | 46 |
| Figure 41S. ROESY spectrum of <b>6</b> and <b>7</b> ( $\text{CDCl}_3$ ).....                                                    | 47 |
| Figure 42S. HREIMS (+) report of <b>6</b> .....                                                                                 | 48 |
| Figure 43S. HRESIMS (+) report of <b>7</b> .....                                                                                | 49 |
| Figure 44S. $^1\text{H}$ NMR spectrum of <b>8</b> (600 MHz, $\text{CDCl}_3$ ) .....                                             | 50 |
| Figure 45S. $^{13}\text{C}$ NMR and DEPT spectra of <b>8</b> (150 MHz, $\text{CDCl}_3$ ).....                                   | 51 |
| Figure 46S. HSQC spectrum of <b>8</b> ( $\text{CDCl}_3$ ) .....                                                                 | 52 |
| Figure 47S. $^1\text{H}$ - $^1\text{H}$ COSY spectrum of <b>8</b> ( $\text{CDCl}_3$ ) .....                                     | 53 |
| Figure 48S. HMBC spectrum of <b>8</b> ( $\text{CDCl}_3$ ) .....                                                                 | 54 |
| Figure 49S. HREIMS (+) report of <b>8</b> .....                                                                                 | 55 |
| Figure 50S. $^1\text{H}$ NMR spectrum of <b>9</b> (500 MHz, $\text{CDCl}_3$ ) .....                                             | 56 |
| Figure 51S. $^{13}\text{C}$ NMR and DEPT spectra of <b>9</b> (125 MHz, $\text{CDCl}_3$ ).....                                   | 57 |
| Figure 52S. $^1\text{H}$ NMR spectrum of <b>9a</b> (800 MHz, $\text{CDCl}_3$ ) .....                                            | 58 |
| Figure 53S. $^{13}\text{C}$ NMR and DEPT spectra of <b>9a</b> (200 MHz, $\text{CDCl}_3$ ).....                                  | 59 |
| 3. Computational details for <b>8</b> .....                                                                                     | 60 |
| Table 3S. Important thermodynamic parameters (a. u.) of the optimized <b>8</b> at B3LYP/6-31G(d,p) level in the gas phase. .... | 61 |
| Table 4S. Conformational analysis of <b>8</b> ( <sup>a</sup> Relative energy; <sup>b</sup> Conformational distribution) .....   | 61 |
| References .....                                                                                                                | 61 |

## 1. Crystal data of compounds 1 and 5

**Table 1S.** Crystal data and structure refinement for Cu\_1\_0m

|                                   |                                                |          |
|-----------------------------------|------------------------------------------------|----------|
| Identification code               | Cu_1_0m                                        |          |
| Empirical formula                 | C <sub>15</sub> H <sub>22</sub> O <sub>2</sub> |          |
| Formula weight                    | 234.32                                         |          |
| Temperature                       | 100(2) K                                       |          |
| Wavelength                        | 1.54178 Å                                      |          |
| Crystal system                    | Orthorhombic                                   |          |
| Space group                       | P2 <sub>1</sub> 2 <sub>1</sub> 2 <sub>1</sub>  |          |
| Unit cell dimensions              | a = 7.70800(10) Å                              | α = 90°. |
|                                   | b = 12.5490(2) Å                               | β = 90°. |
|                                   | c = 13.1278(2) Å                               | γ = 90°. |
| Volume                            | 1269.82(3) Å <sup>3</sup>                      |          |
| Z                                 | 4                                              |          |
| Density (calculated)              | 1.226 mg/m <sup>3</sup>                        |          |
| Absorption coefficient            | 0.621 mm <sup>-1</sup>                         |          |
| F(000)                            | 512                                            |          |
| Crystal size                      | 0.850 x 0.220 x 0.190 mm <sup>3</sup>          |          |
| Theta range for data collection   | 4.875 to 70.187°.                              |          |
| Index ranges                      | -8<=h<=9, -15<=k<=14, -15<=l<=14               |          |
| Reflections collected             | 8045                                           |          |
| Independent reflections           | 2306 [R(int) = 0.0442]                         |          |
| Completeness to theta = 67.679°   | 99.3 %                                         |          |
| Absorption correction             | Semi-empirical from equivalents                |          |
| Refinement method                 | Full-matrix least-squares on F <sup>2</sup>    |          |
| Data / restraints / parameters    | 2306 / 0 / 161                                 |          |
| Goodness-of-fit on F <sup>2</sup> | 1.061                                          |          |
| Final R indices [I>2sigma(I)]     | R1 = 0.0513, wR2 = 0.1314                      |          |
| R indices (all data)              | R1 = 0.0513, wR2 = 0.1315                      |          |
| Absolute structure parameter      | 0.09(6)                                        |          |
| Extinction coefficient            | 0.0064(17)                                     |          |
| Largest diff. peak and hole       | 0.292 and -0.319 e.Å <sup>-3</sup>             |          |

**Table 2S.** Crystal data and structure refinement for Cu\_5\_0m

|                                   |                                                |                    |                          |
|-----------------------------------|------------------------------------------------|--------------------|--------------------------|
| Identification code               | Cu_5_0m                                        |                    |                          |
| Empirical formula                 | C <sub>16</sub> H <sub>24</sub> O <sub>4</sub> |                    |                          |
| Formula weight                    | 280.35                                         |                    |                          |
| Temperature                       | 100(2) K                                       |                    |                          |
| Wavelength                        | 1.54178 Å                                      |                    |                          |
| Crystal system                    | Monoclinic                                     |                    |                          |
| Space group                       | P2 <sub>1</sub>                                |                    |                          |
| Unit cell dimensions              | a = 6.4948(2) Å                                | α = 90°.           |                          |
|                                   | b = 7.4524(3) Å                                | β = 101.0040(10)°. |                          |
|                                   | c = 15.2812(6) Å                               | γ = 90°.           |                          |
| Volume                            | 726.04(5) Å <sup>3</sup>                       |                    |                          |
| Z                                 | 2                                              |                    |                          |
| Density (calculated)              | 1.282 mg/m <sup>3</sup>                        |                    |                          |
| Absorption coefficient            | 0.736 mm <sup>-1</sup>                         |                    |                          |
| F(000)                            | 304                                            |                    |                          |
| Crystal size                      | 0.640 x 0.420 x 0.100 mm <sup>3</sup>          |                    |                          |
| Theta range for data collection   | 2.946 to 70.141°.                              |                    |                          |
| Index ranges                      | -7<=h<=7, -8<=k<=8, -15<=l<=17                 |                    |                          |
| Reflections collected             | 7540                                           |                    |                          |
| Independent reflections           | 2510 [R(int) = 0.0263]                         |                    |                          |
| Completeness to theta = 67.679°   | 94.8 %                                         |                    |                          |
| Absorption correction             | Semi-empirical from equivalents                |                    |                          |
| Refinement method                 | Full-matrix least-squares on F <sup>2</sup>    |                    |                          |
| Data / restraints / parameters    | 2510 / 1 / 191                                 |                    |                          |
| Goodness-of-fit on F <sup>2</sup> | 1.056                                          |                    |                          |
| Final R indices [I>2sigma(I)]     | R1 = 0.0327, wR2 = 0.0844                      |                    |                          |
| R indices (all data)              | R1 = 0.0327, wR2 = 0.0845                      |                    |                          |
| Absolute structure parameter      | 0.17(3)                                        |                    |                          |
| Extinction coefficient            | n/a                                            |                    |                          |
| Largest diff. peak and hole       | 0.217                                          | and                | -0.260 e.Å <sup>-3</sup> |

## 2. Supplementary Figures

Figure 1S.  $^1\text{H}$  NMR spectrum of **1** (600 MHz,  $\text{CDCl}_3$ )

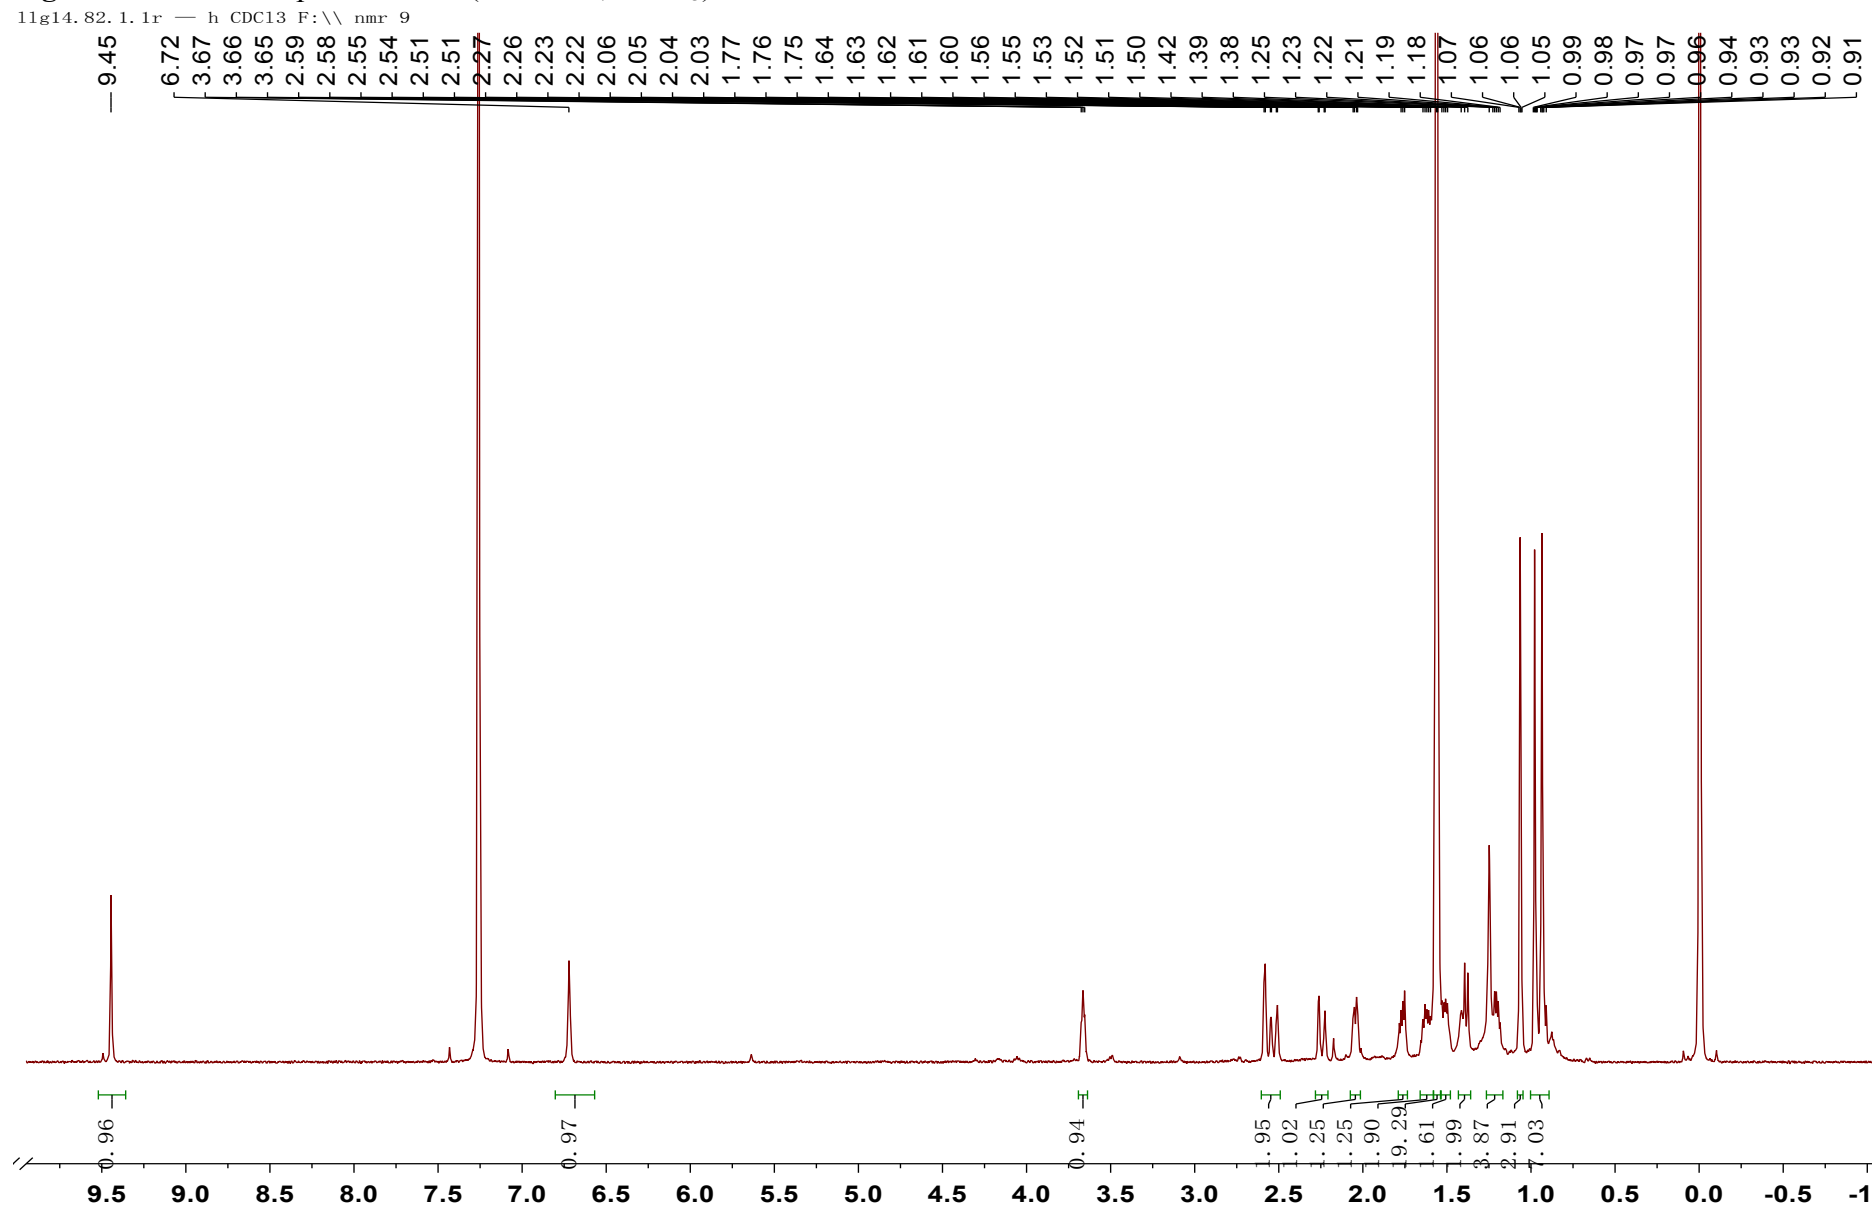

Figure 2S.  $^{13}\text{C}$  NMR and DEPT spectra of **1** (150 MHz,  $\text{CDCl}_3$ )

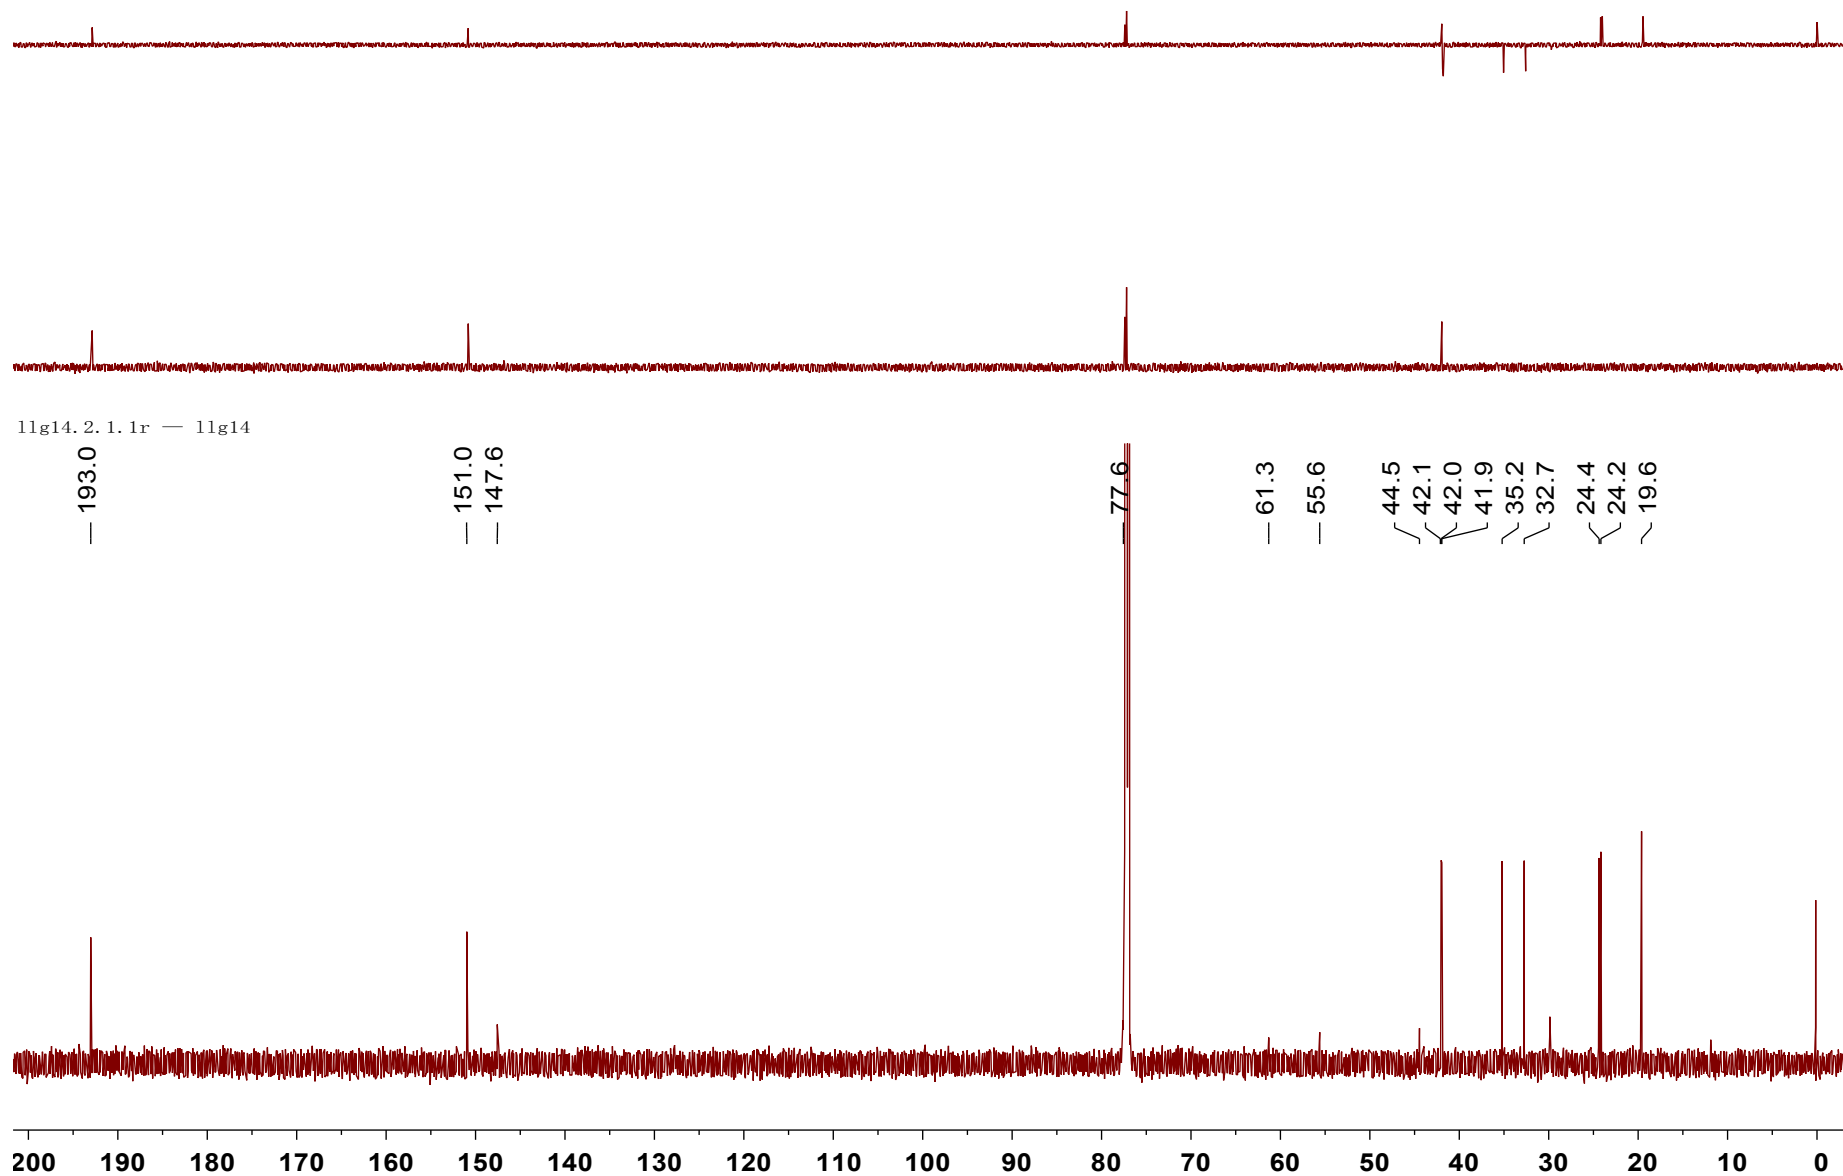

**Figure 3S.** HSQC spectrum of **1** (CDCl<sub>3</sub>)

11g14.86.1.2rr — hsqc CDC13 av600

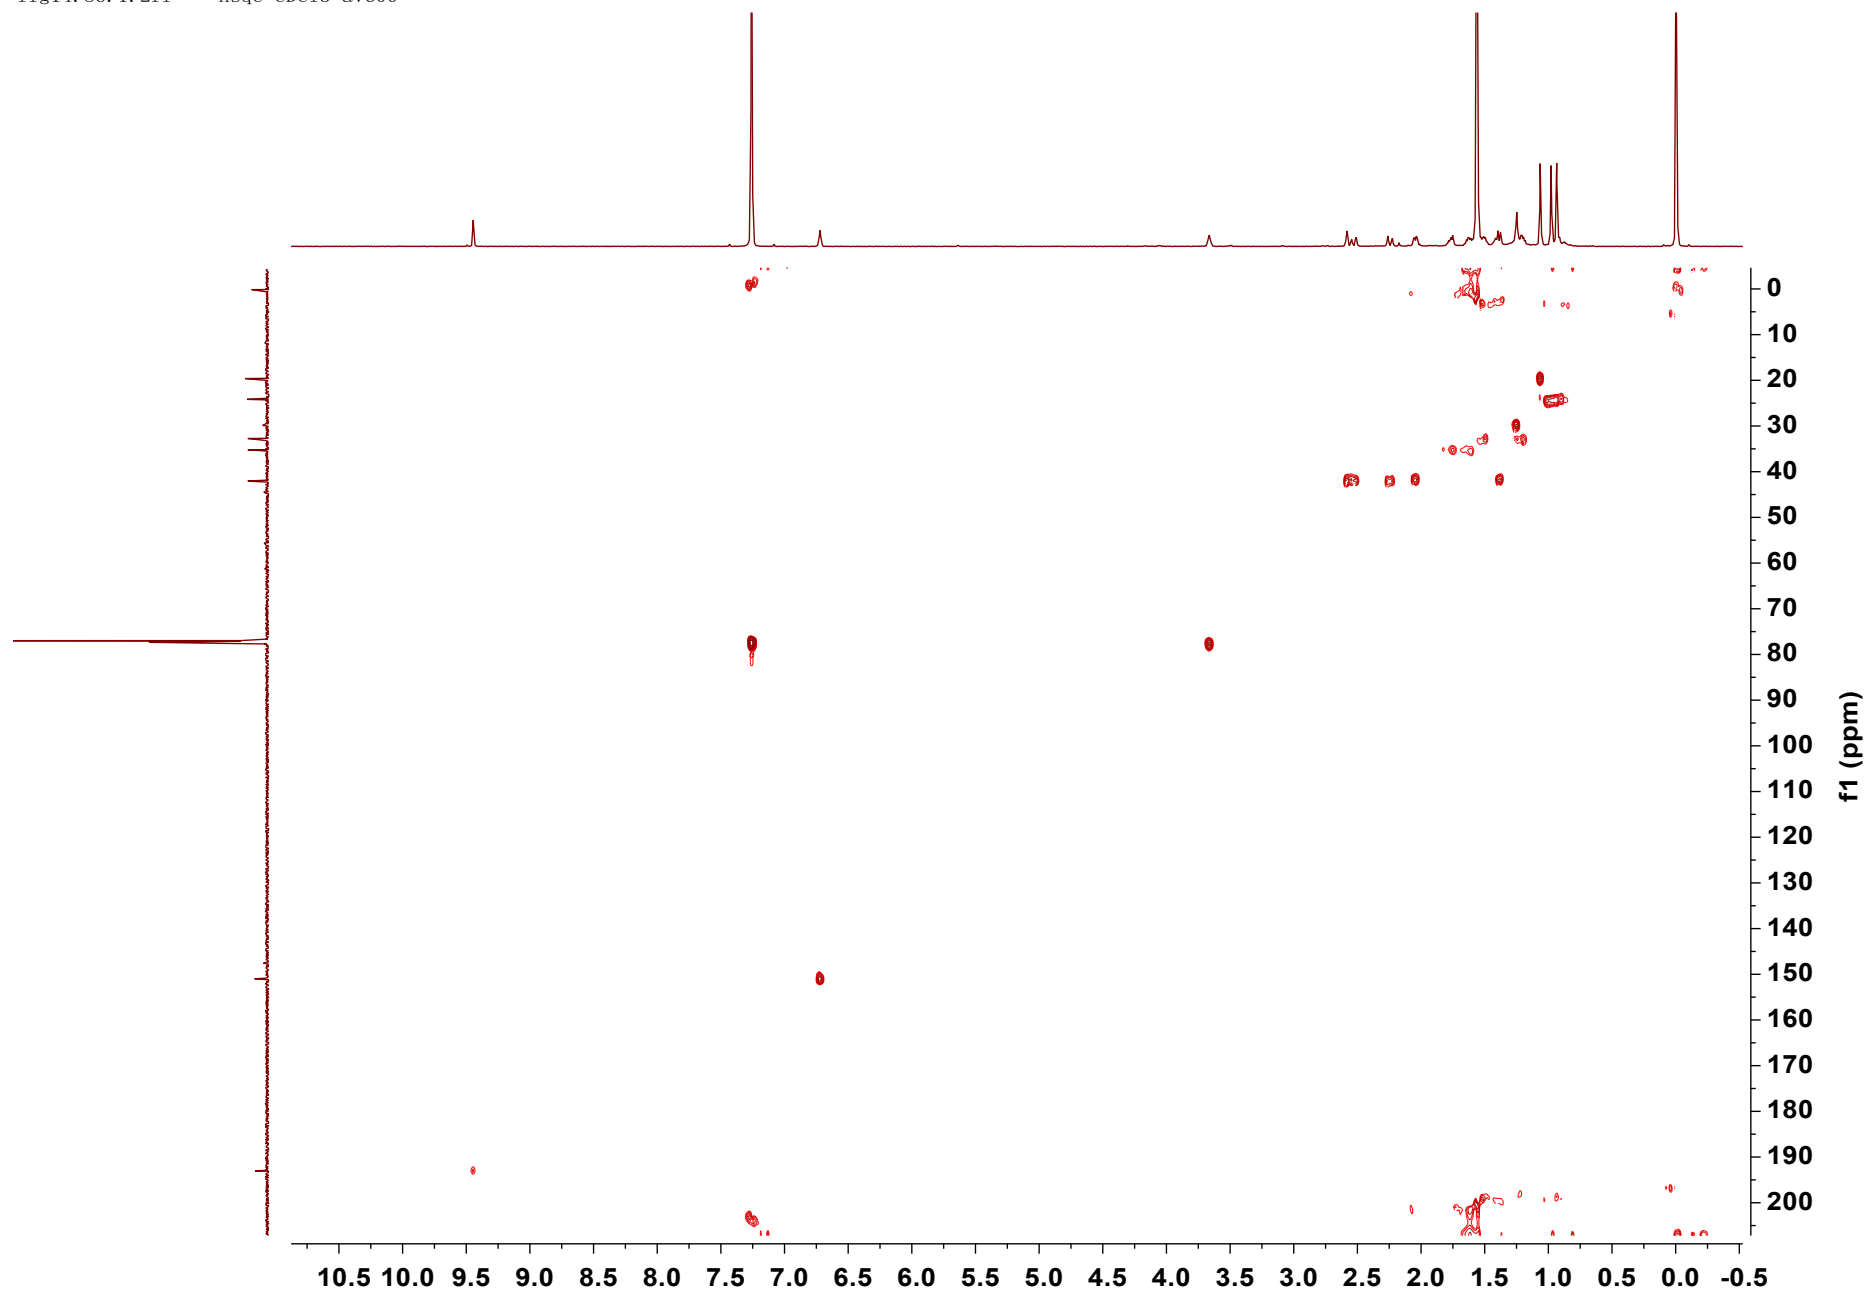



**Figure 4S.**  $^1\text{H}$ - $^1\text{H}$  COSY spectrum of **1** ( $\text{CDCl}_3$ )

11g14.84.1.2rr — cosy CDC13 av600

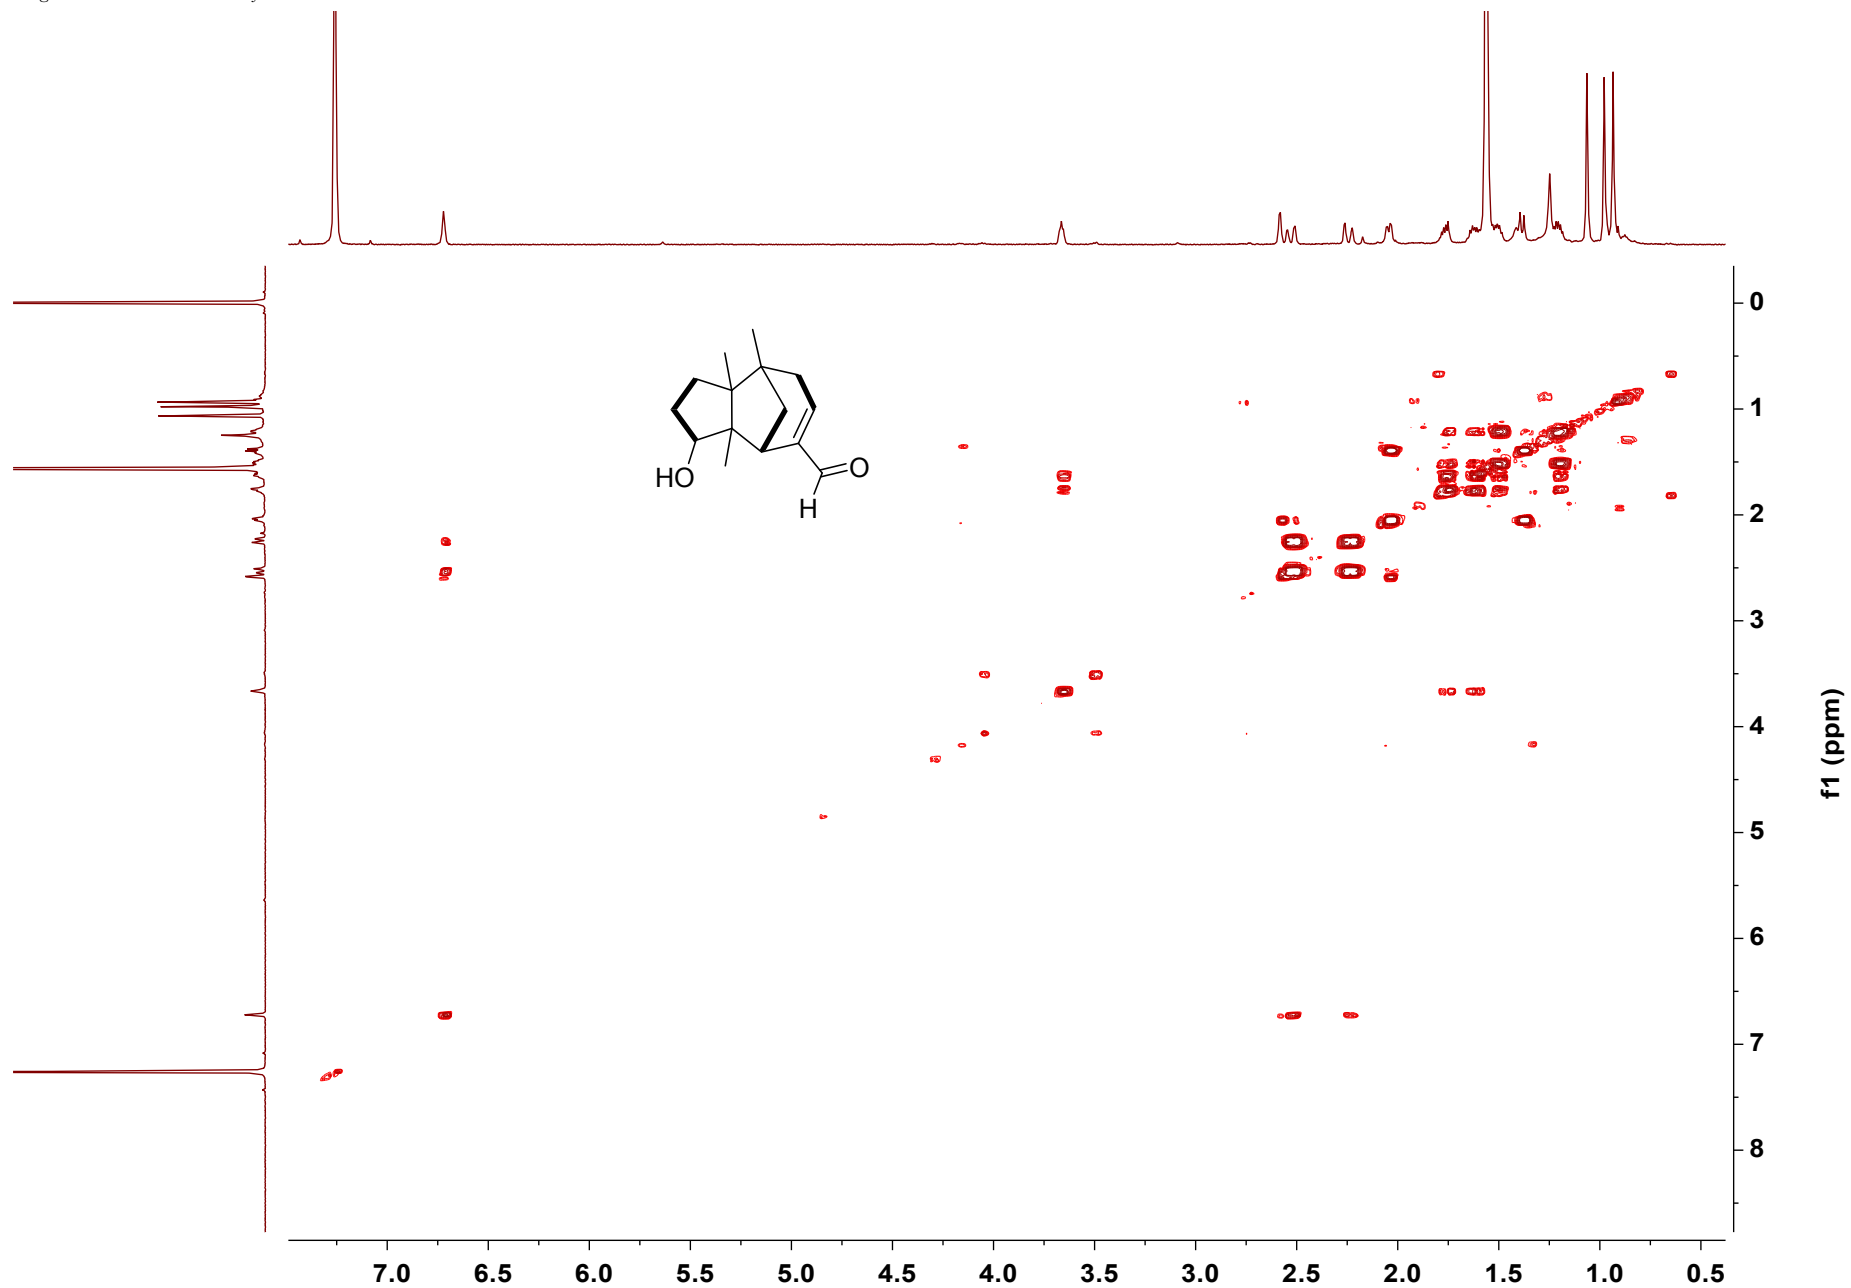

**Figure 5S.** HMBC spectrum of **1** (CDCl<sub>3</sub>)

11g14.85.1.2rr — hmbe CDC13 av600

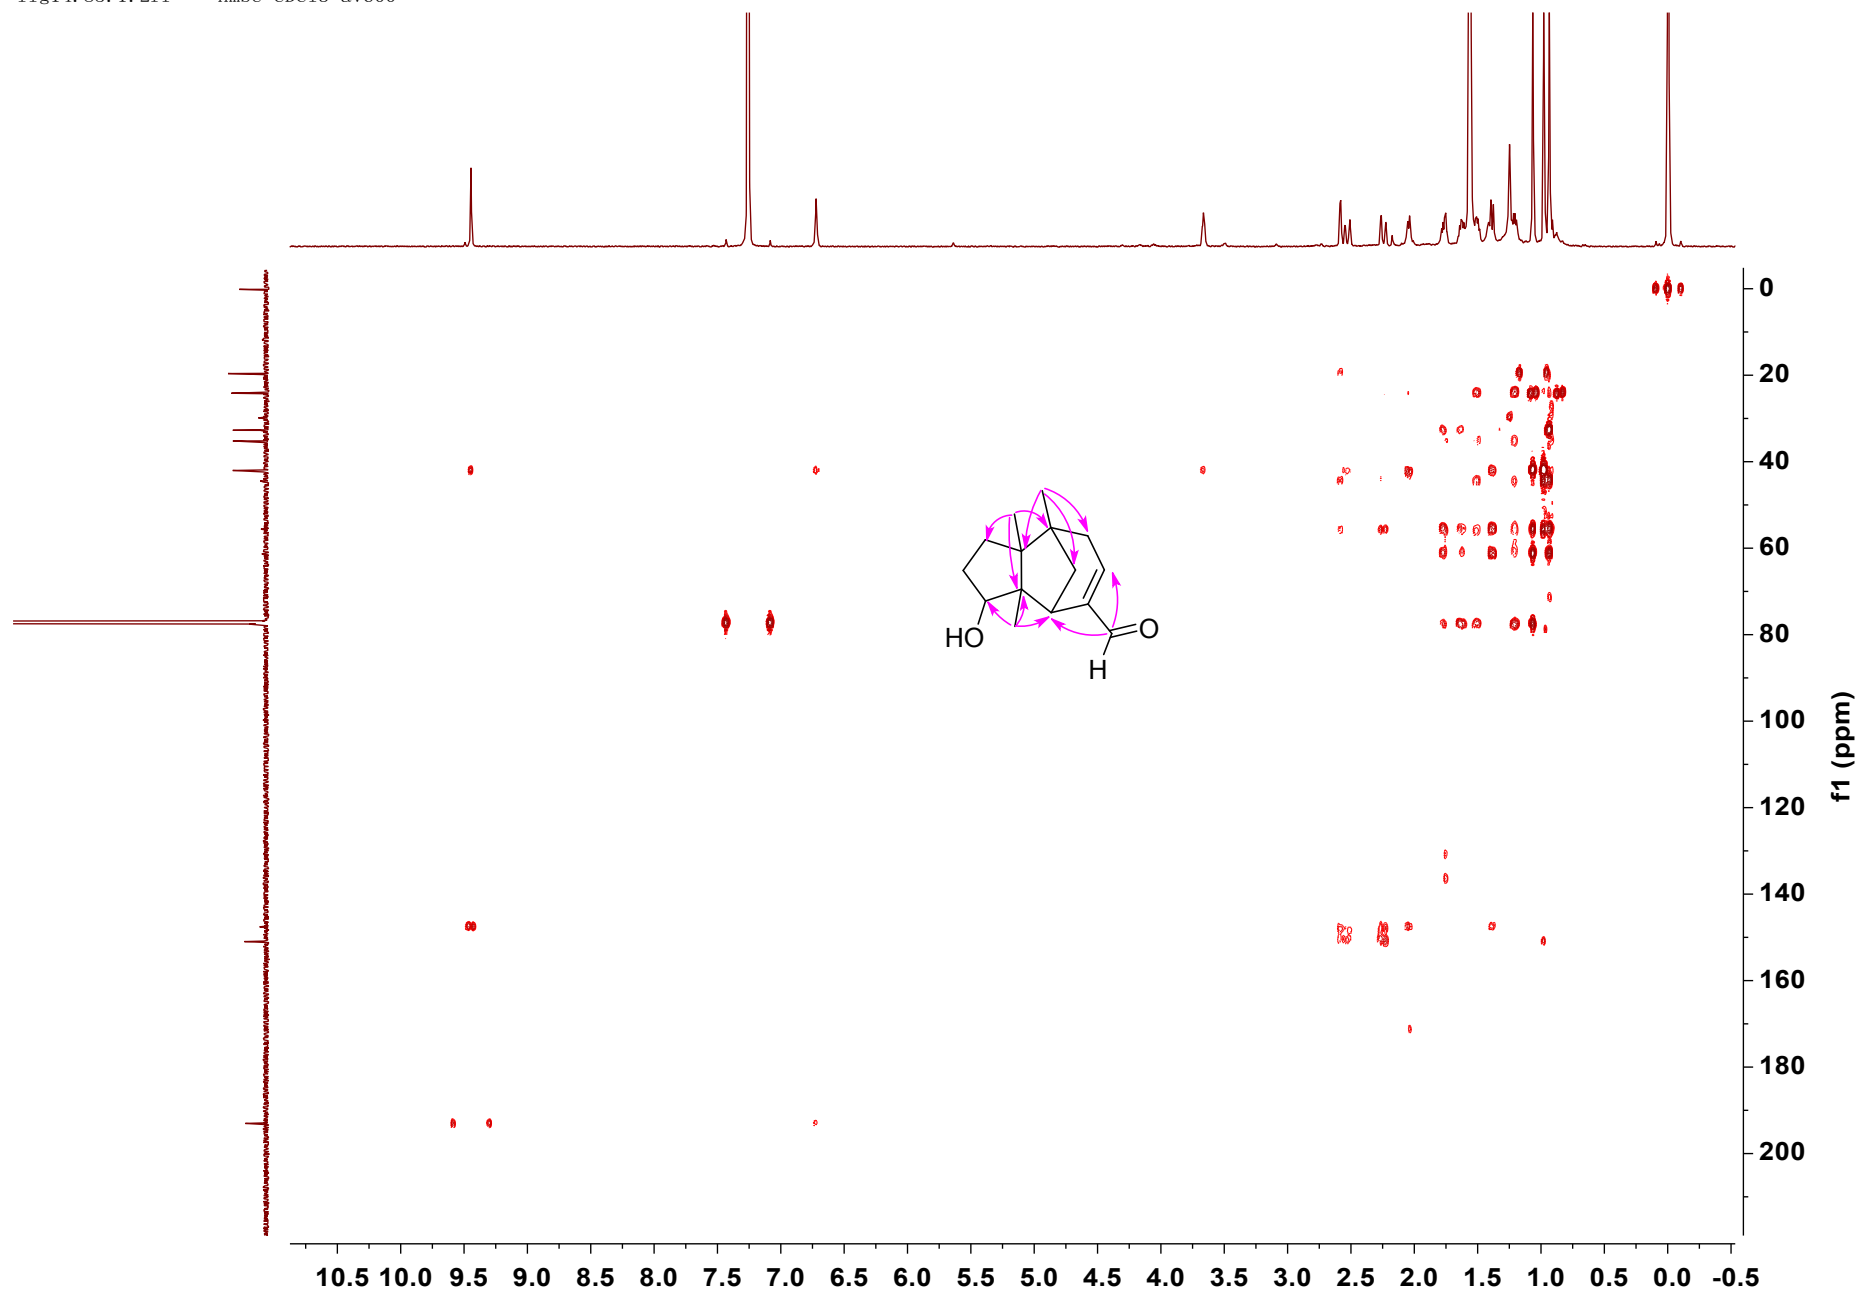

**Figure 6S.** ROESY spectrum of **1** (CDCl<sub>3</sub>)

11g14.83.1.2rr — roesy CDC13 av600

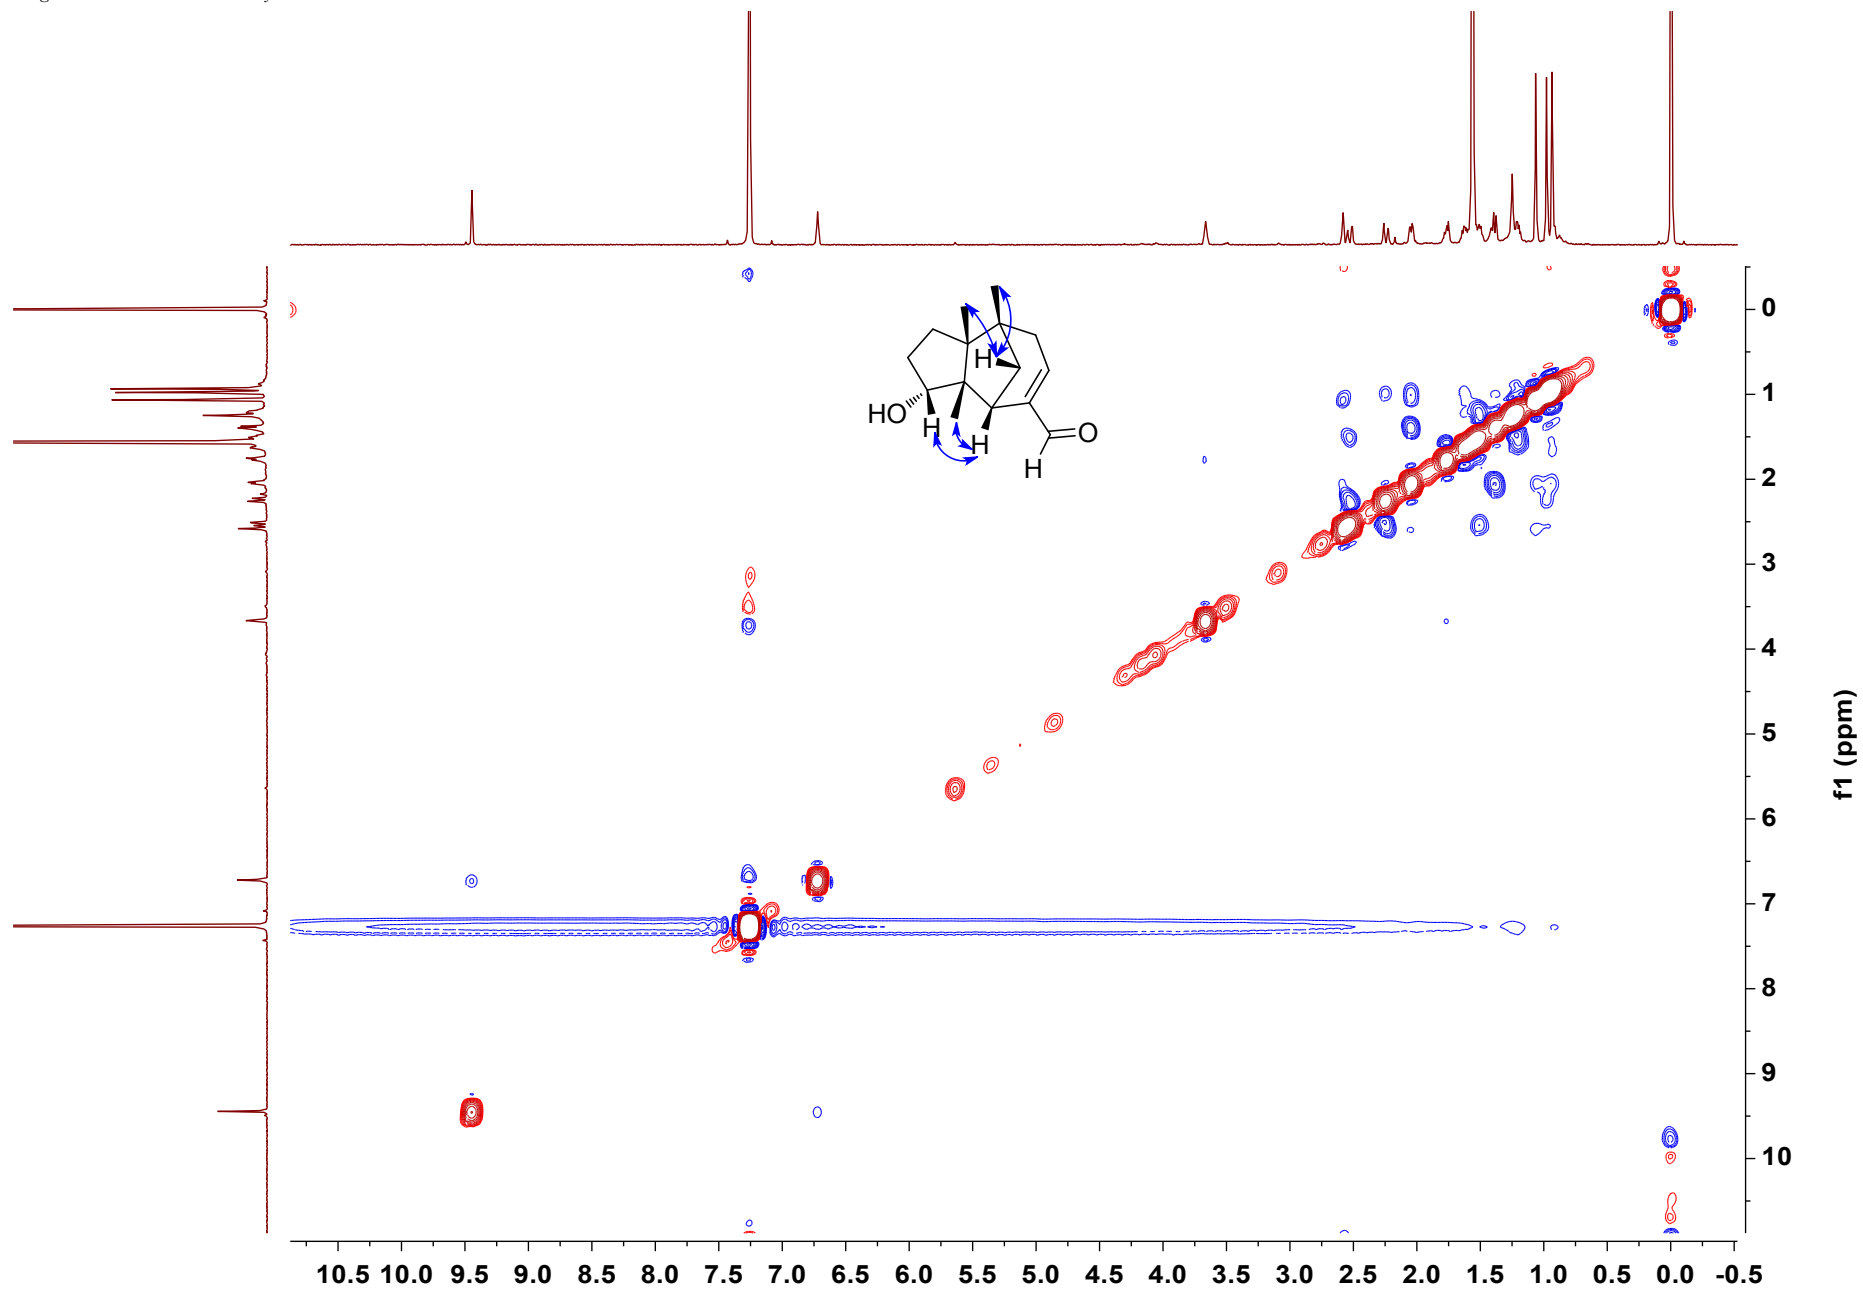

Figure 7S. HREIMS (+) report of 1

Elemental Composition Report

Single Mass Analysis

Tolerance = 10.0 PPM / DBE: min = -10.0, max = 120.0

Selected filters: None

Monoisotopic Mass, Odd and Even Electron Ions

13 formula(e) evaluated with 1 results within limits (up to 51 closest results for each mass)

Elements Used:

C: 0-200 H: 0-400 O: 1-3

Ilg14

17:13:11 14-Apr-2017

Voltage EI+

KIB  
M170414EA-02AFAMMA 22 (2.020) Cm (21:24)  
234.1602

Autospec Premier  
P778  
2

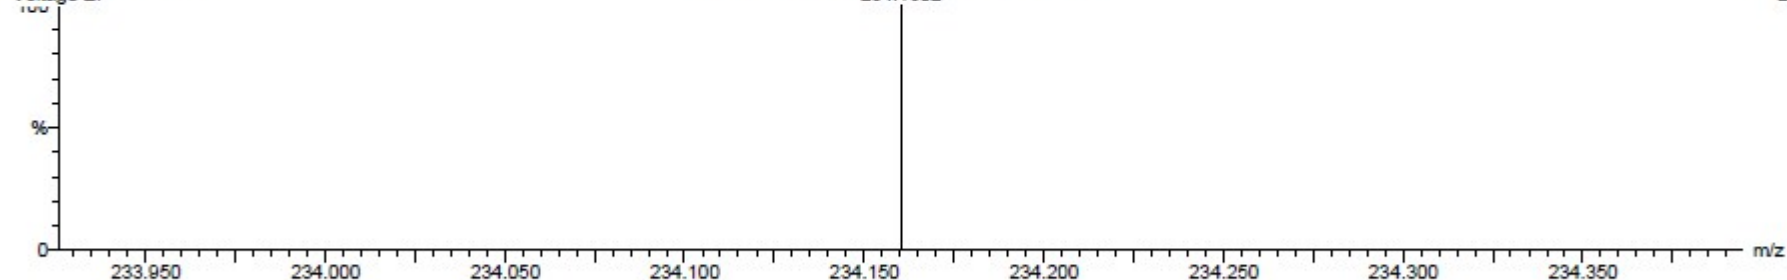

Minimum: -10.0  
Maximum: 200.0 10.0 120.0

| Mass     | Calc. Mass | mDa  | PPM  | DBE | i-FIT     | Formula    |
|----------|------------|------|------|-----|-----------|------------|
| 234.1602 | 234.1620   | -1.8 | -7.7 | 5.0 | 5546025.5 | C15 H22 O2 |

Figure 8S. <sup>1</sup>H NMR spectrum of **2** (600 MHz, CD<sub>3</sub>OD)

11g7.82.1.1r - h MeOD F:\ nmr 21

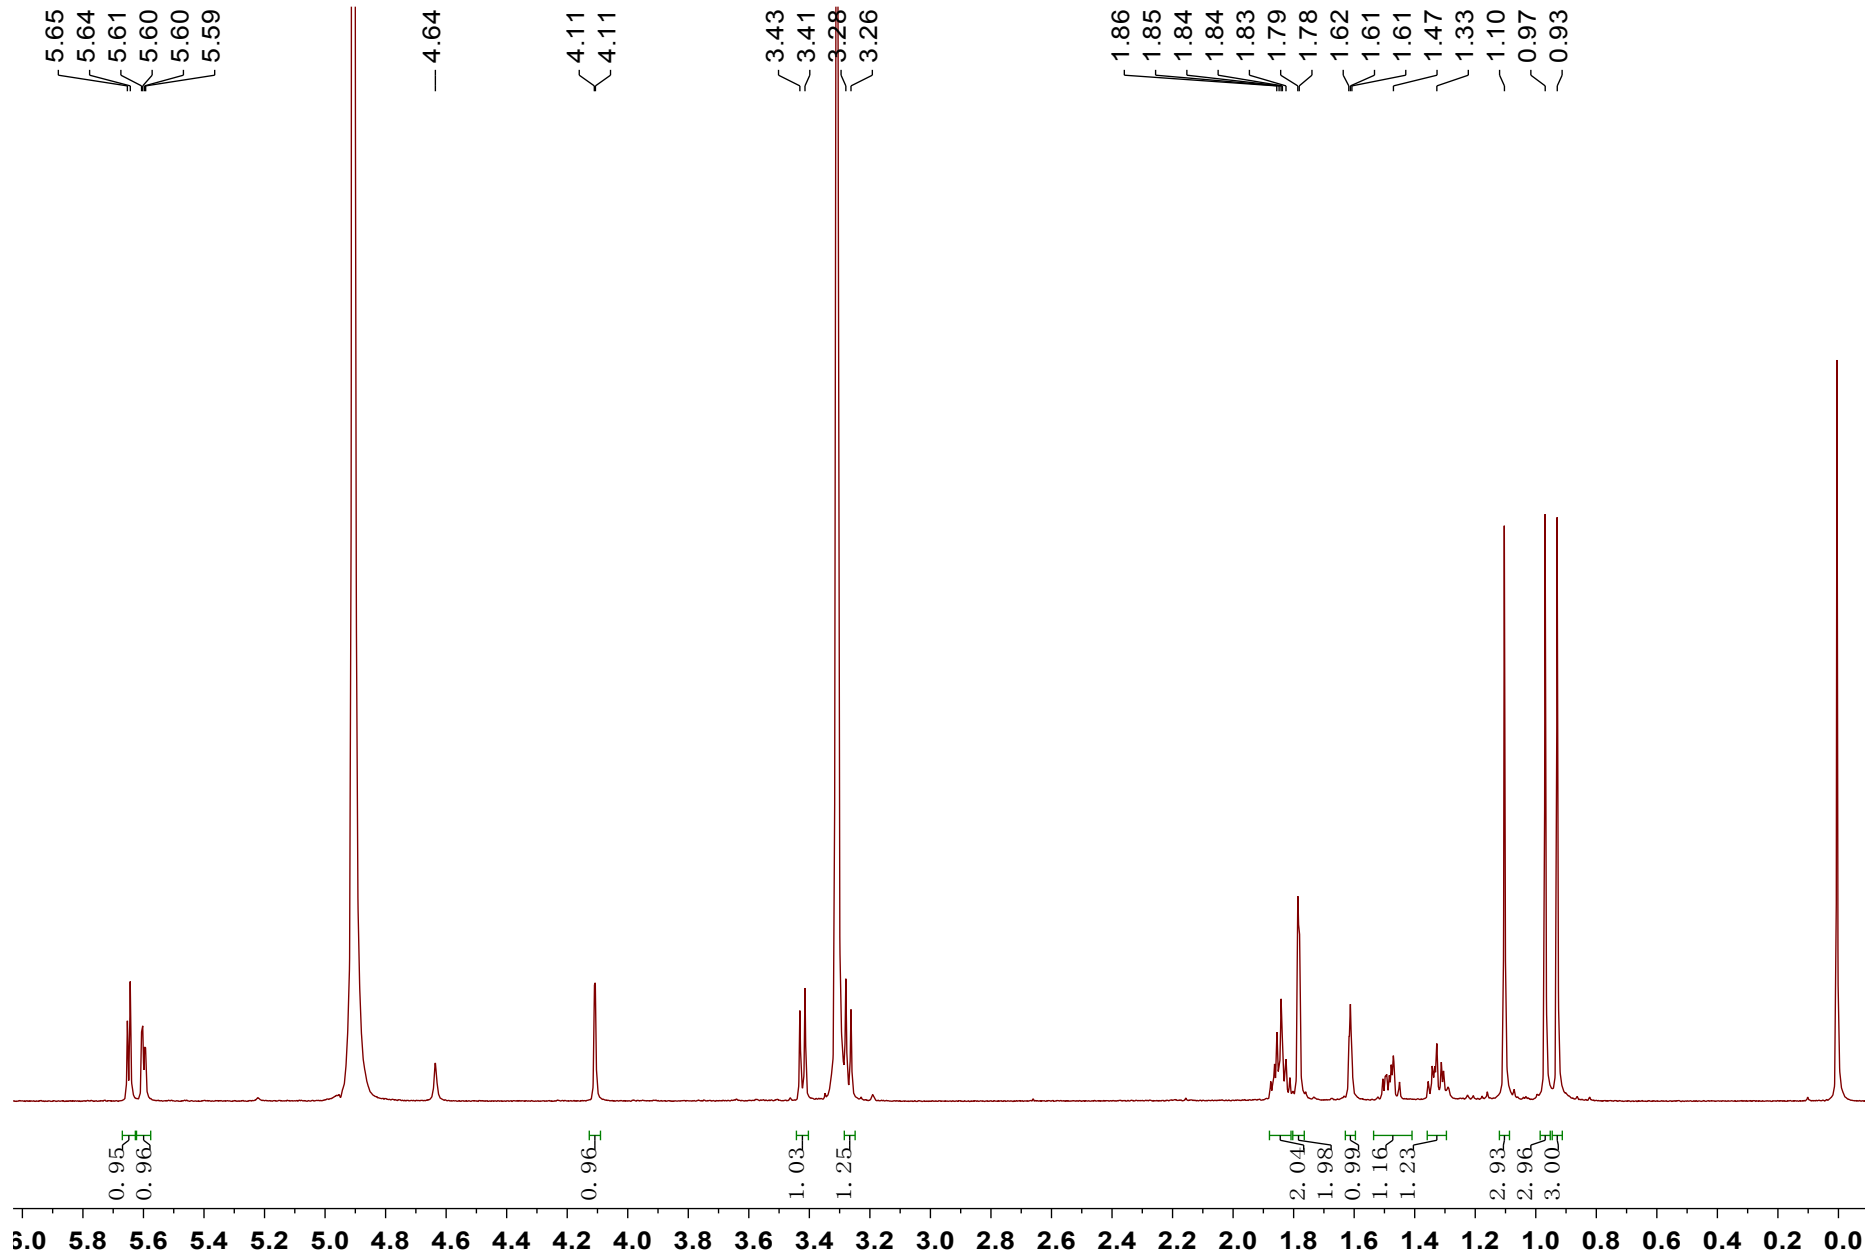

Figure 9S.  $^{13}\text{C}$  NMR and DEPT spectra of **2** (150 MHz,  $\text{CD}_3\text{OD}$ )

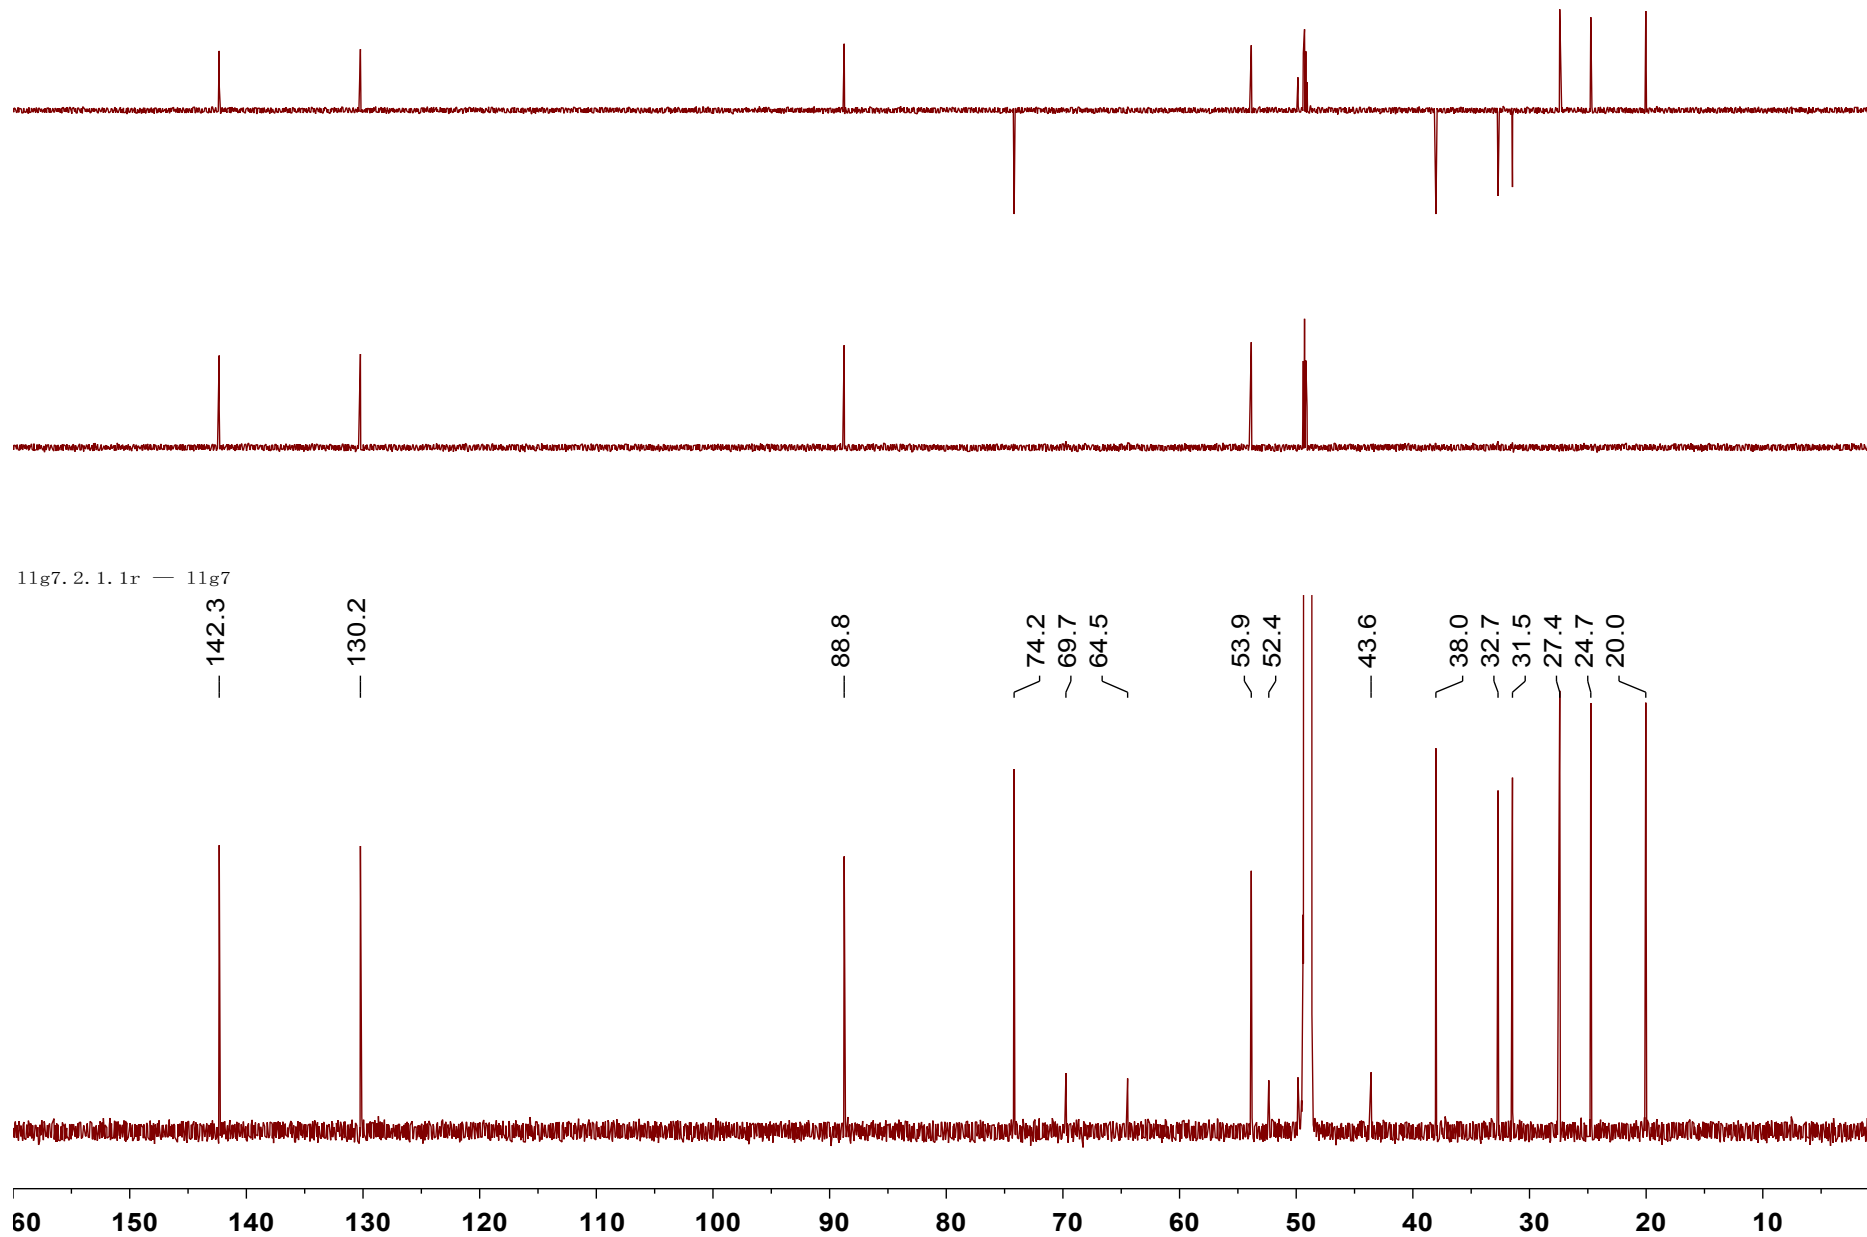

**Figure 10S.** HSQC spectrum of **2** (CD<sub>3</sub>OD)

pdata/1 — hsqc MeOD av600

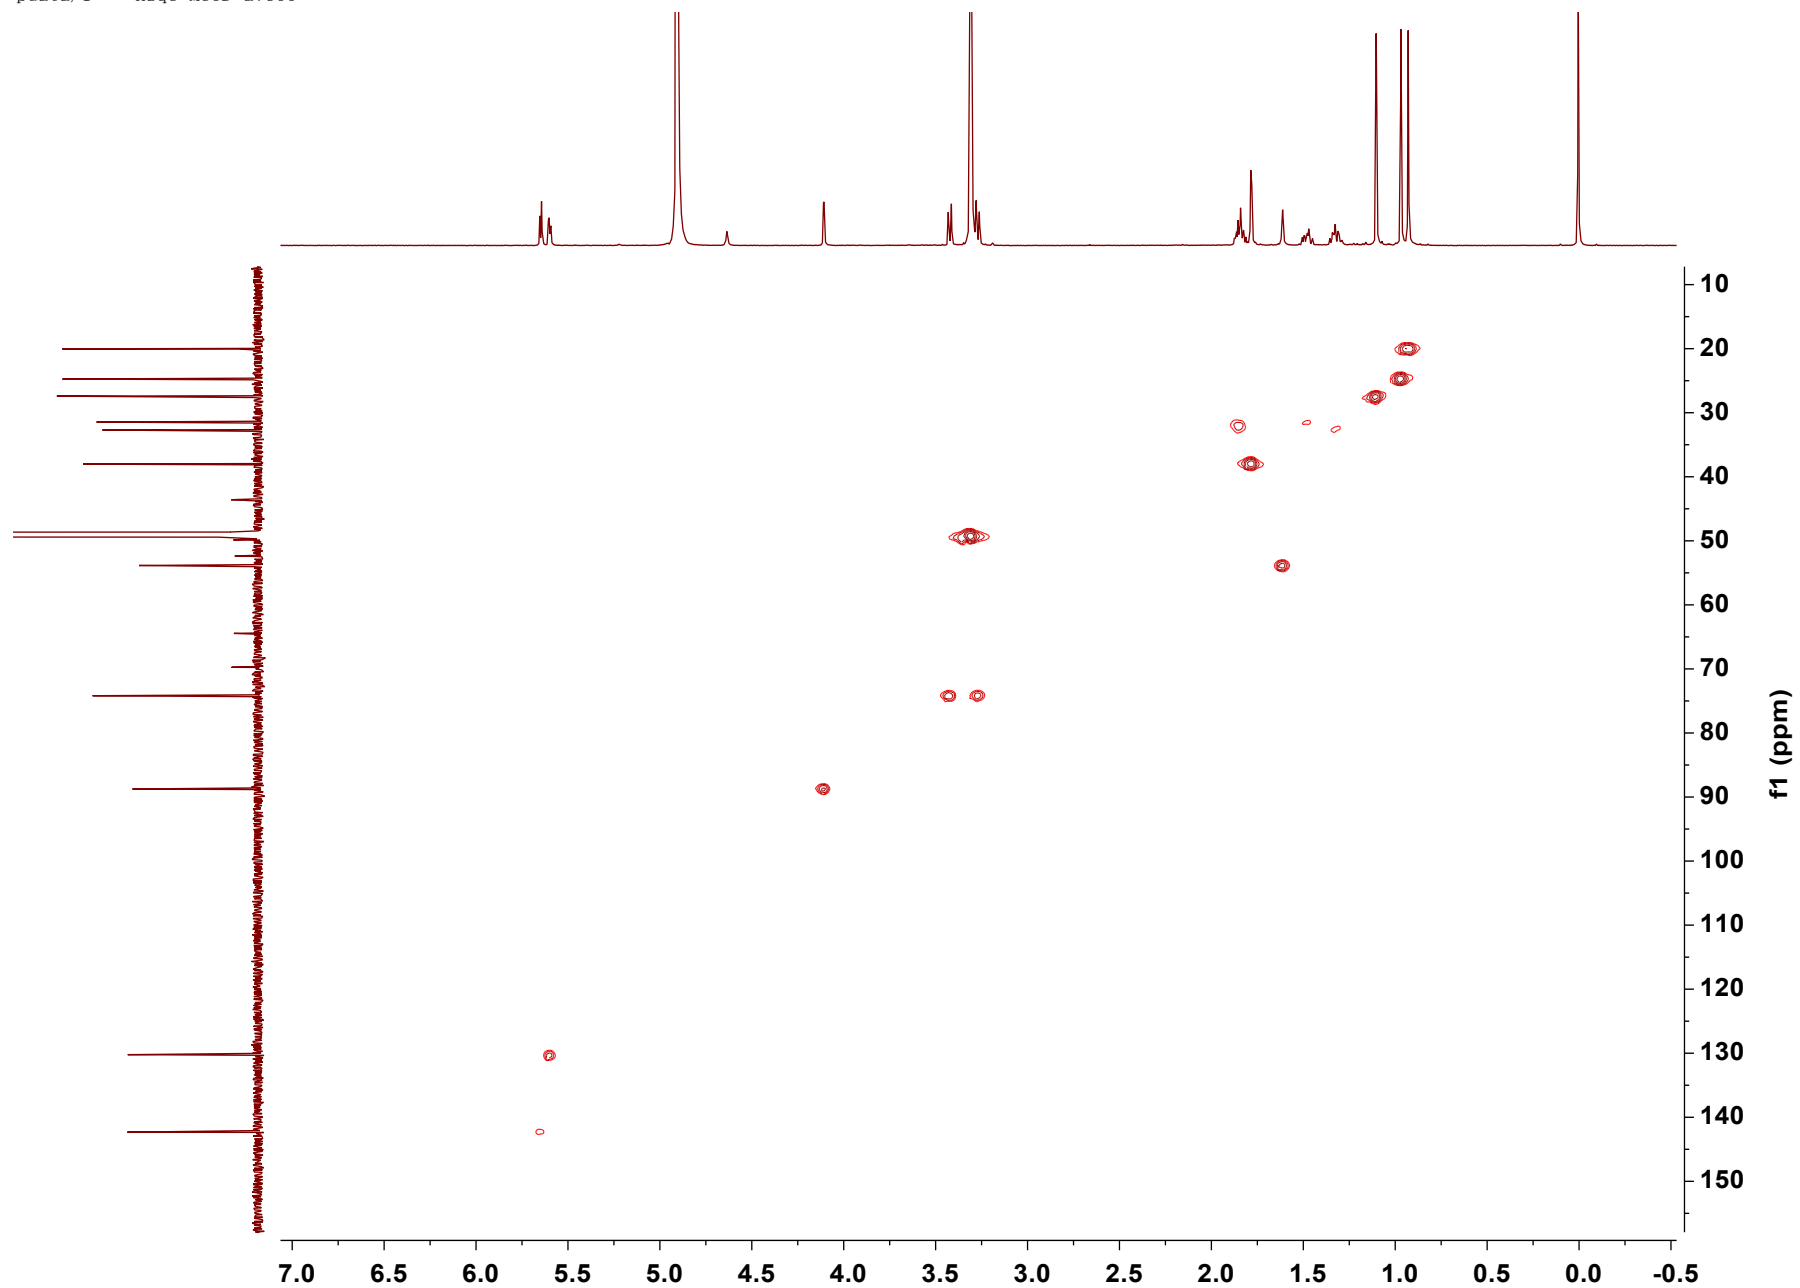

**Figure 11S.**  $^1\text{H}$ - $^1\text{H}$  COSY spectrum of **2** ( $\text{CD}_3\text{OD}$ )

11g7.84.1.2rr — cosy MeOD av600

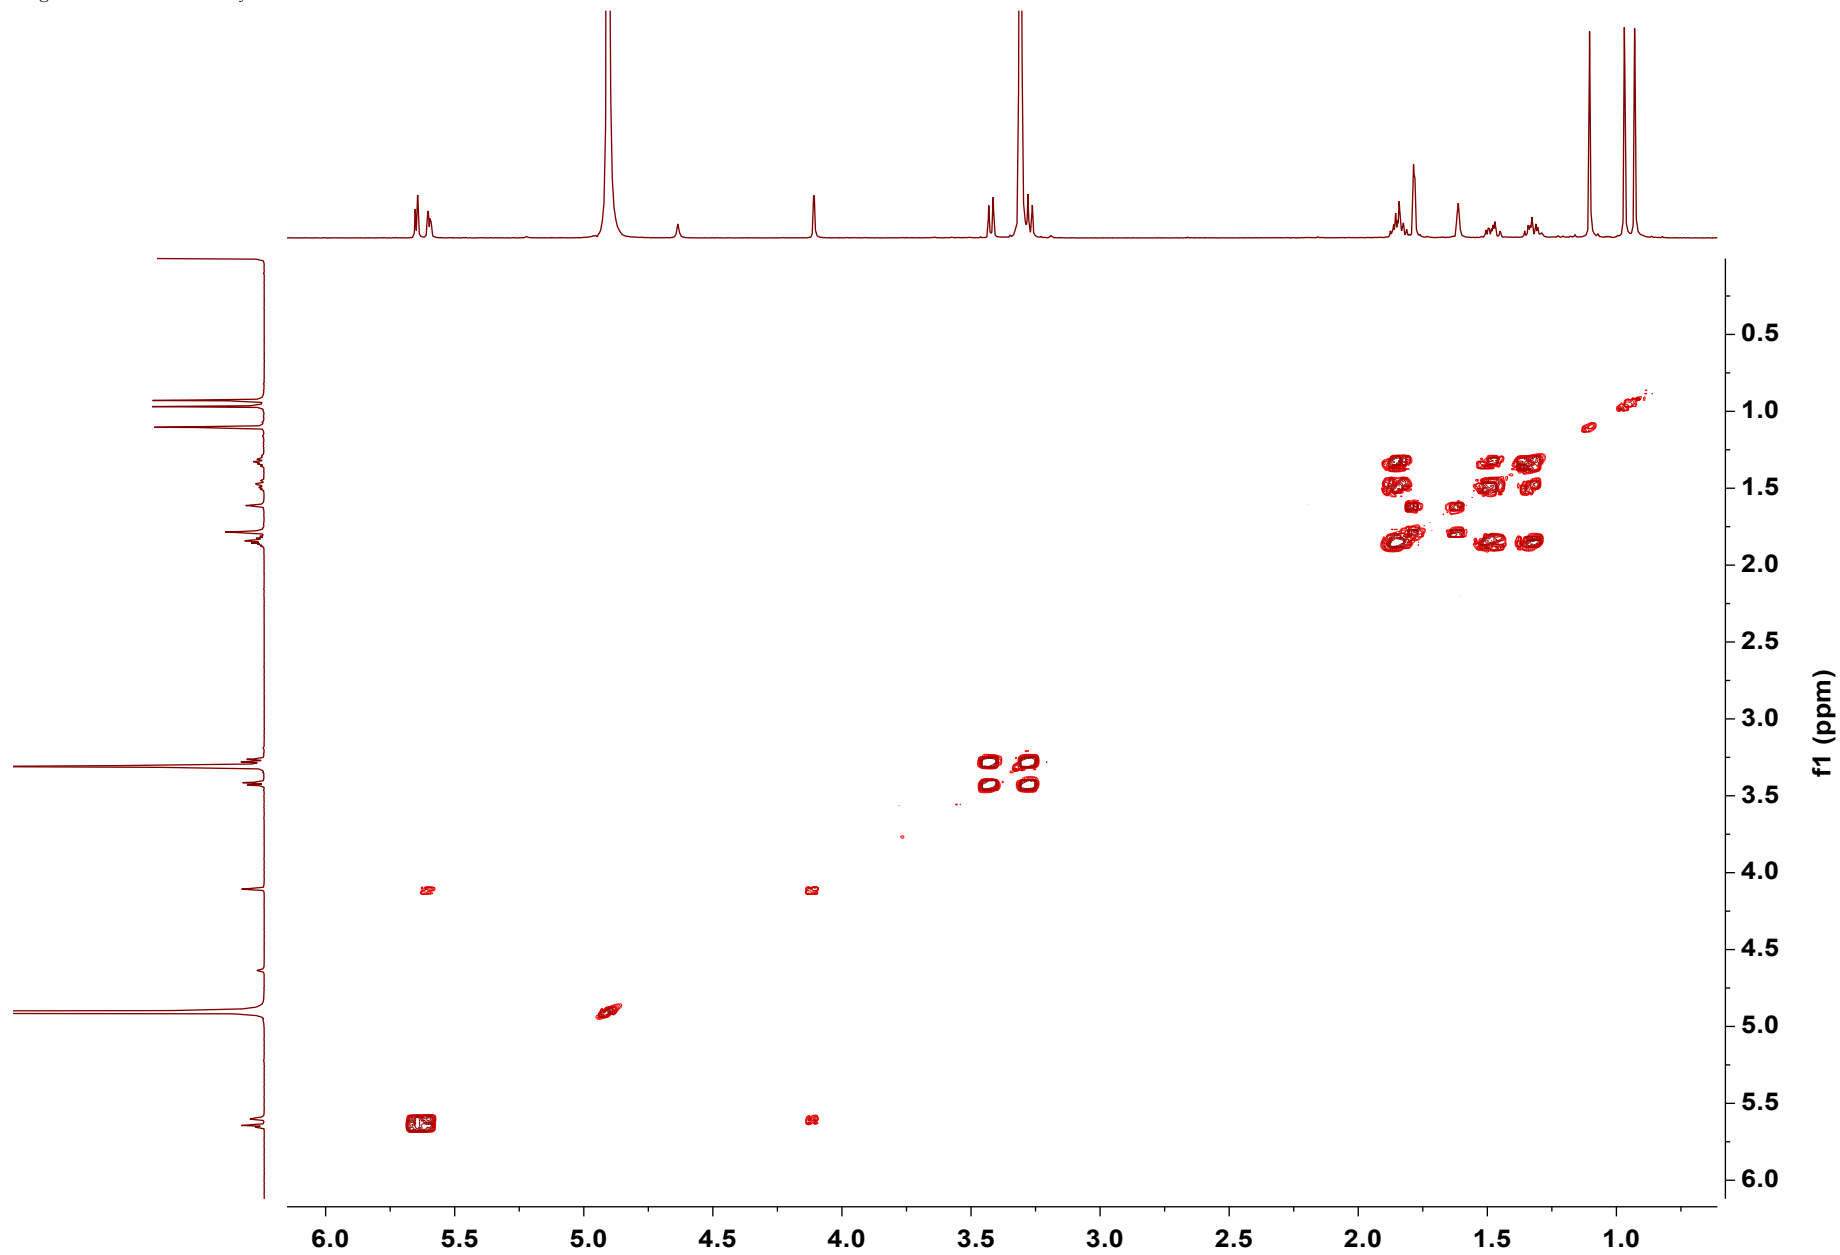



**Figure 12S.** HMBC spectrum of **2** (CD<sub>3</sub>OD)

11g7.85.1.2rr — hmbc MeOD av600

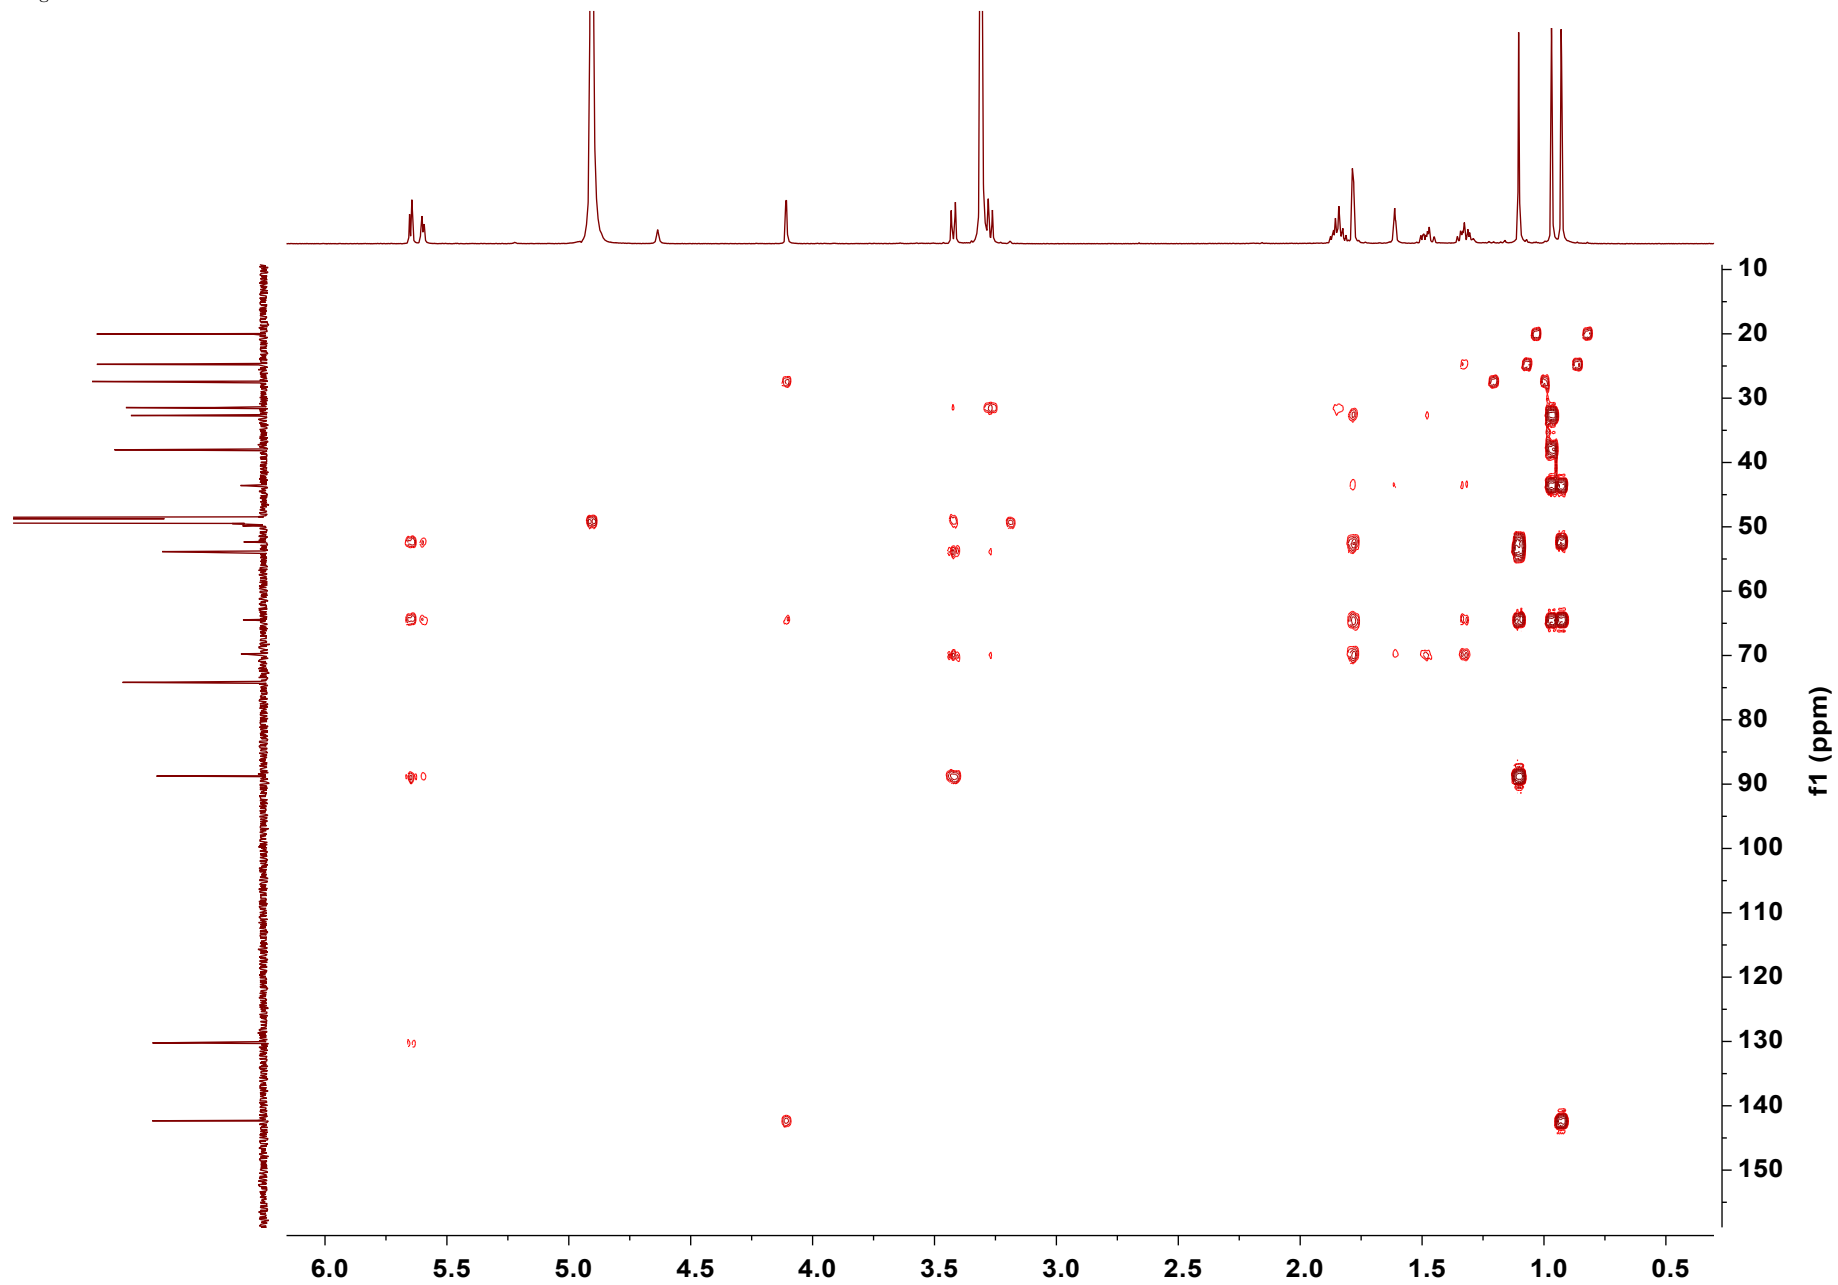

**Figure 13S.** ROESY spectrum of **2** (CD<sub>3</sub>OD)

11g7.83.1.2rr — roesy\_pr MeOD av600

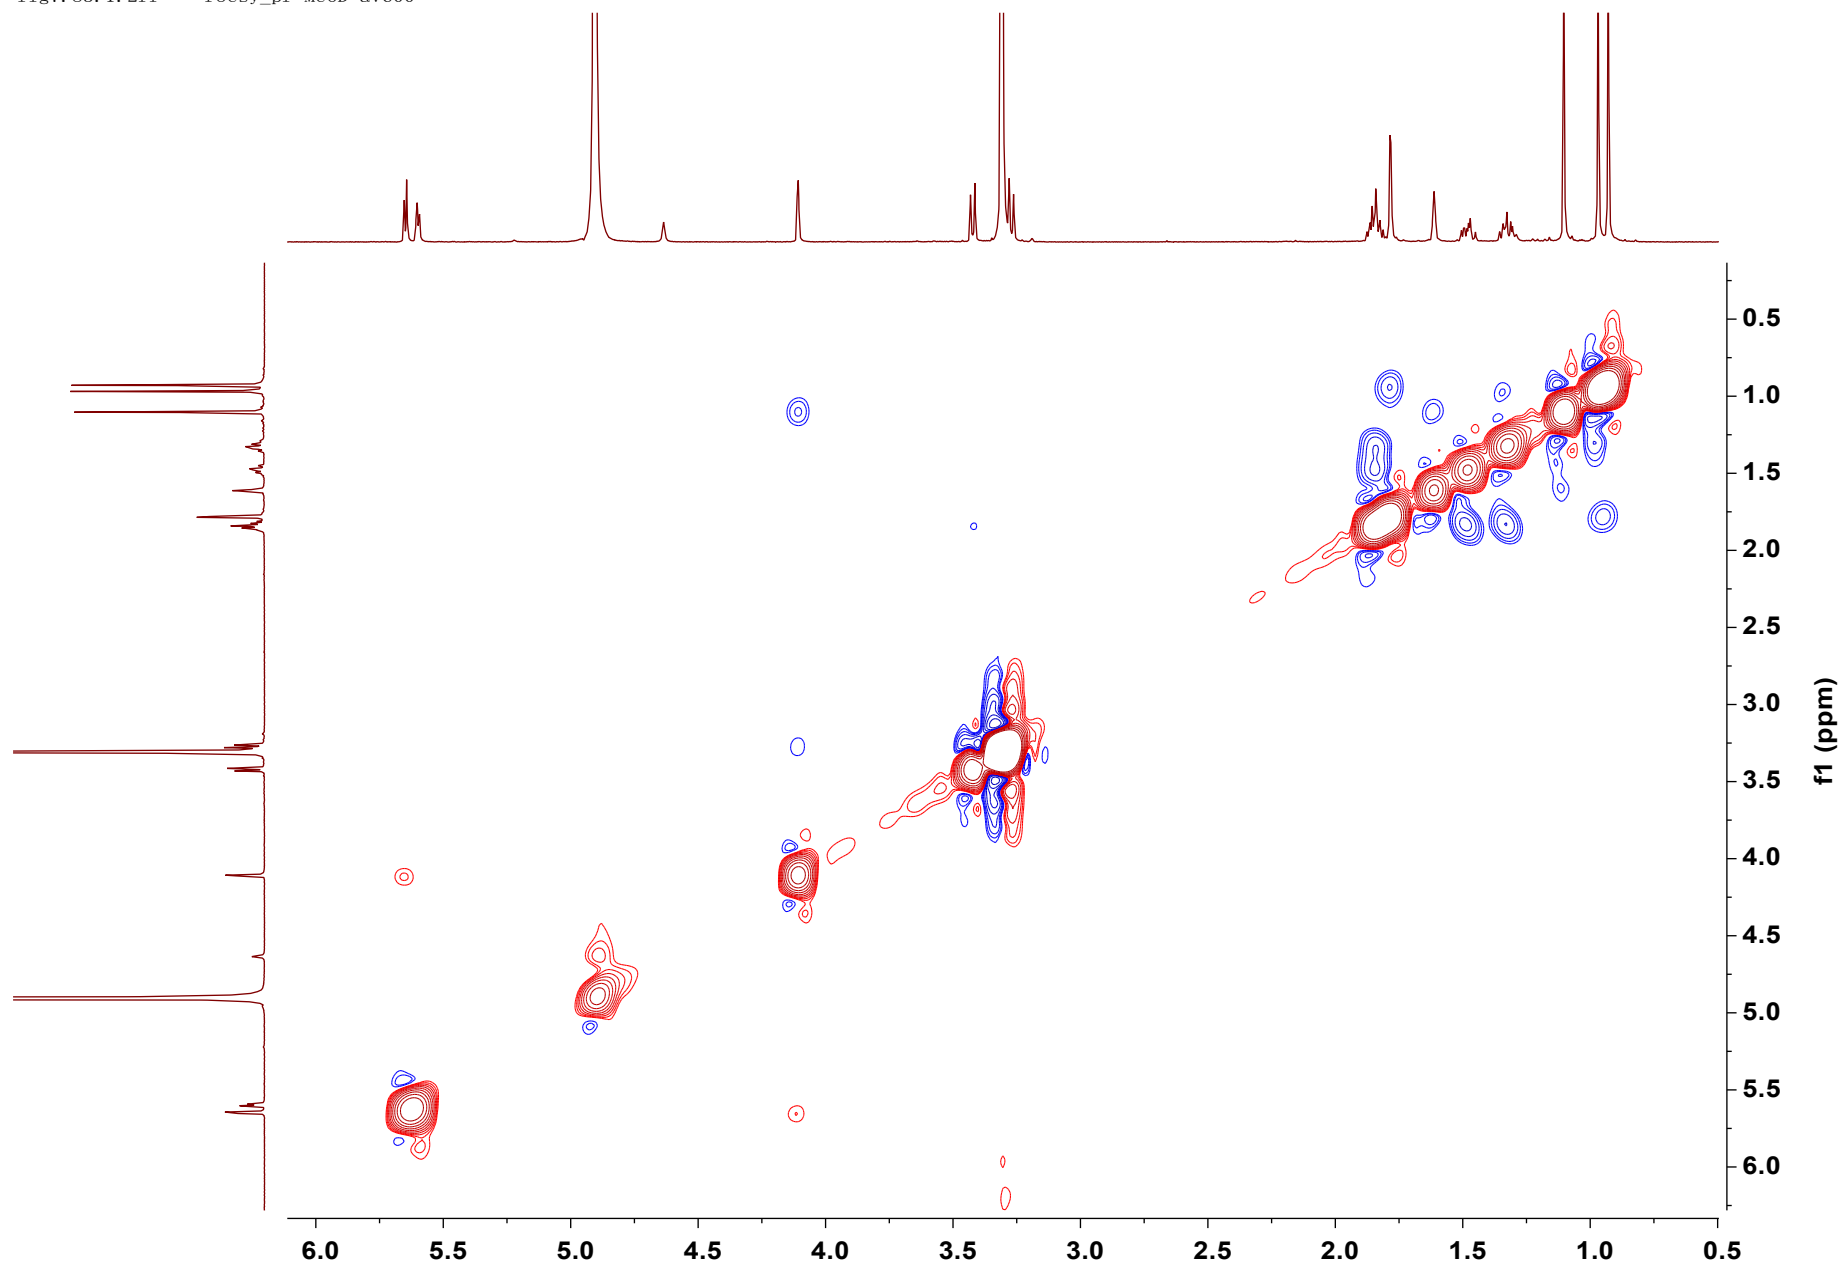

Figure 14S. HREIMS (+) report of 2.

### Elemental Composition Report

#### Single Mass Analysis

Tolerance = 10.0 PPM / DBE: min = -10.0, max = 120.0

Selected filters: None

Monoisotopic Mass, Odd and Even Electron Ions

13 formula(e) evaluated with 1 results within limits (up to 51 closest results for each mass)

Elements Used:

C: 0-200 H: 0-400 O: 1-3

Ilg7

17:22:56 14-Apr-2017

Voltage EI+

KIB  
M170414EA-01AFAMM 14 (1.286)  
234.1617

Autospec Premier  
P776  
1

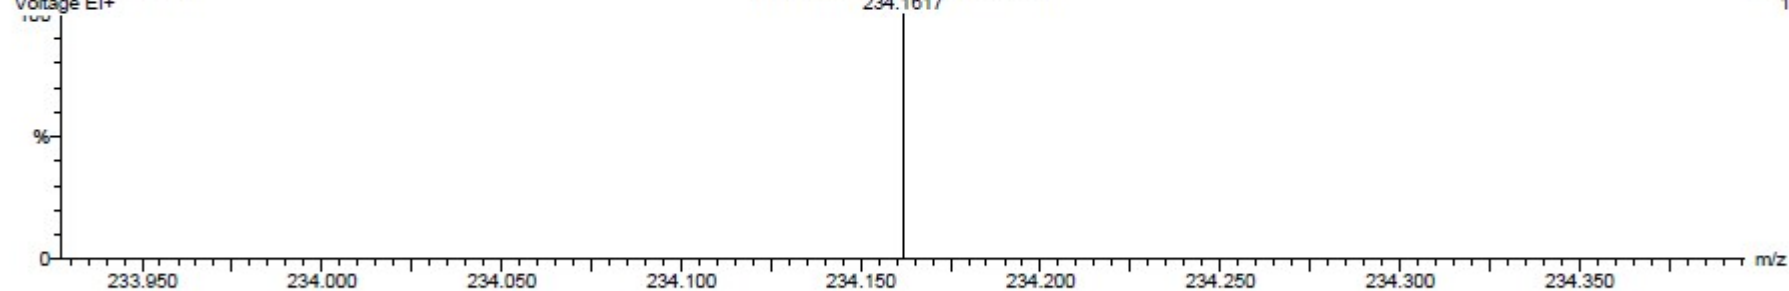

Minimum: -10.0  
Maximum: 200.0 10.0 120.0

| Mass     | Calc. Mass | mDa  | PPM  | DBE | i-FIT     | Formula    |
|----------|------------|------|------|-----|-----------|------------|
| 234.1617 | 234.1620   | -0.3 | -1.3 | 5.0 | 5546026.0 | C15 H22 O2 |

Figure 15S.  $^1\text{H}$  NMR spectrum of **3** (600 MHz,  $\text{CDCl}_3$ )

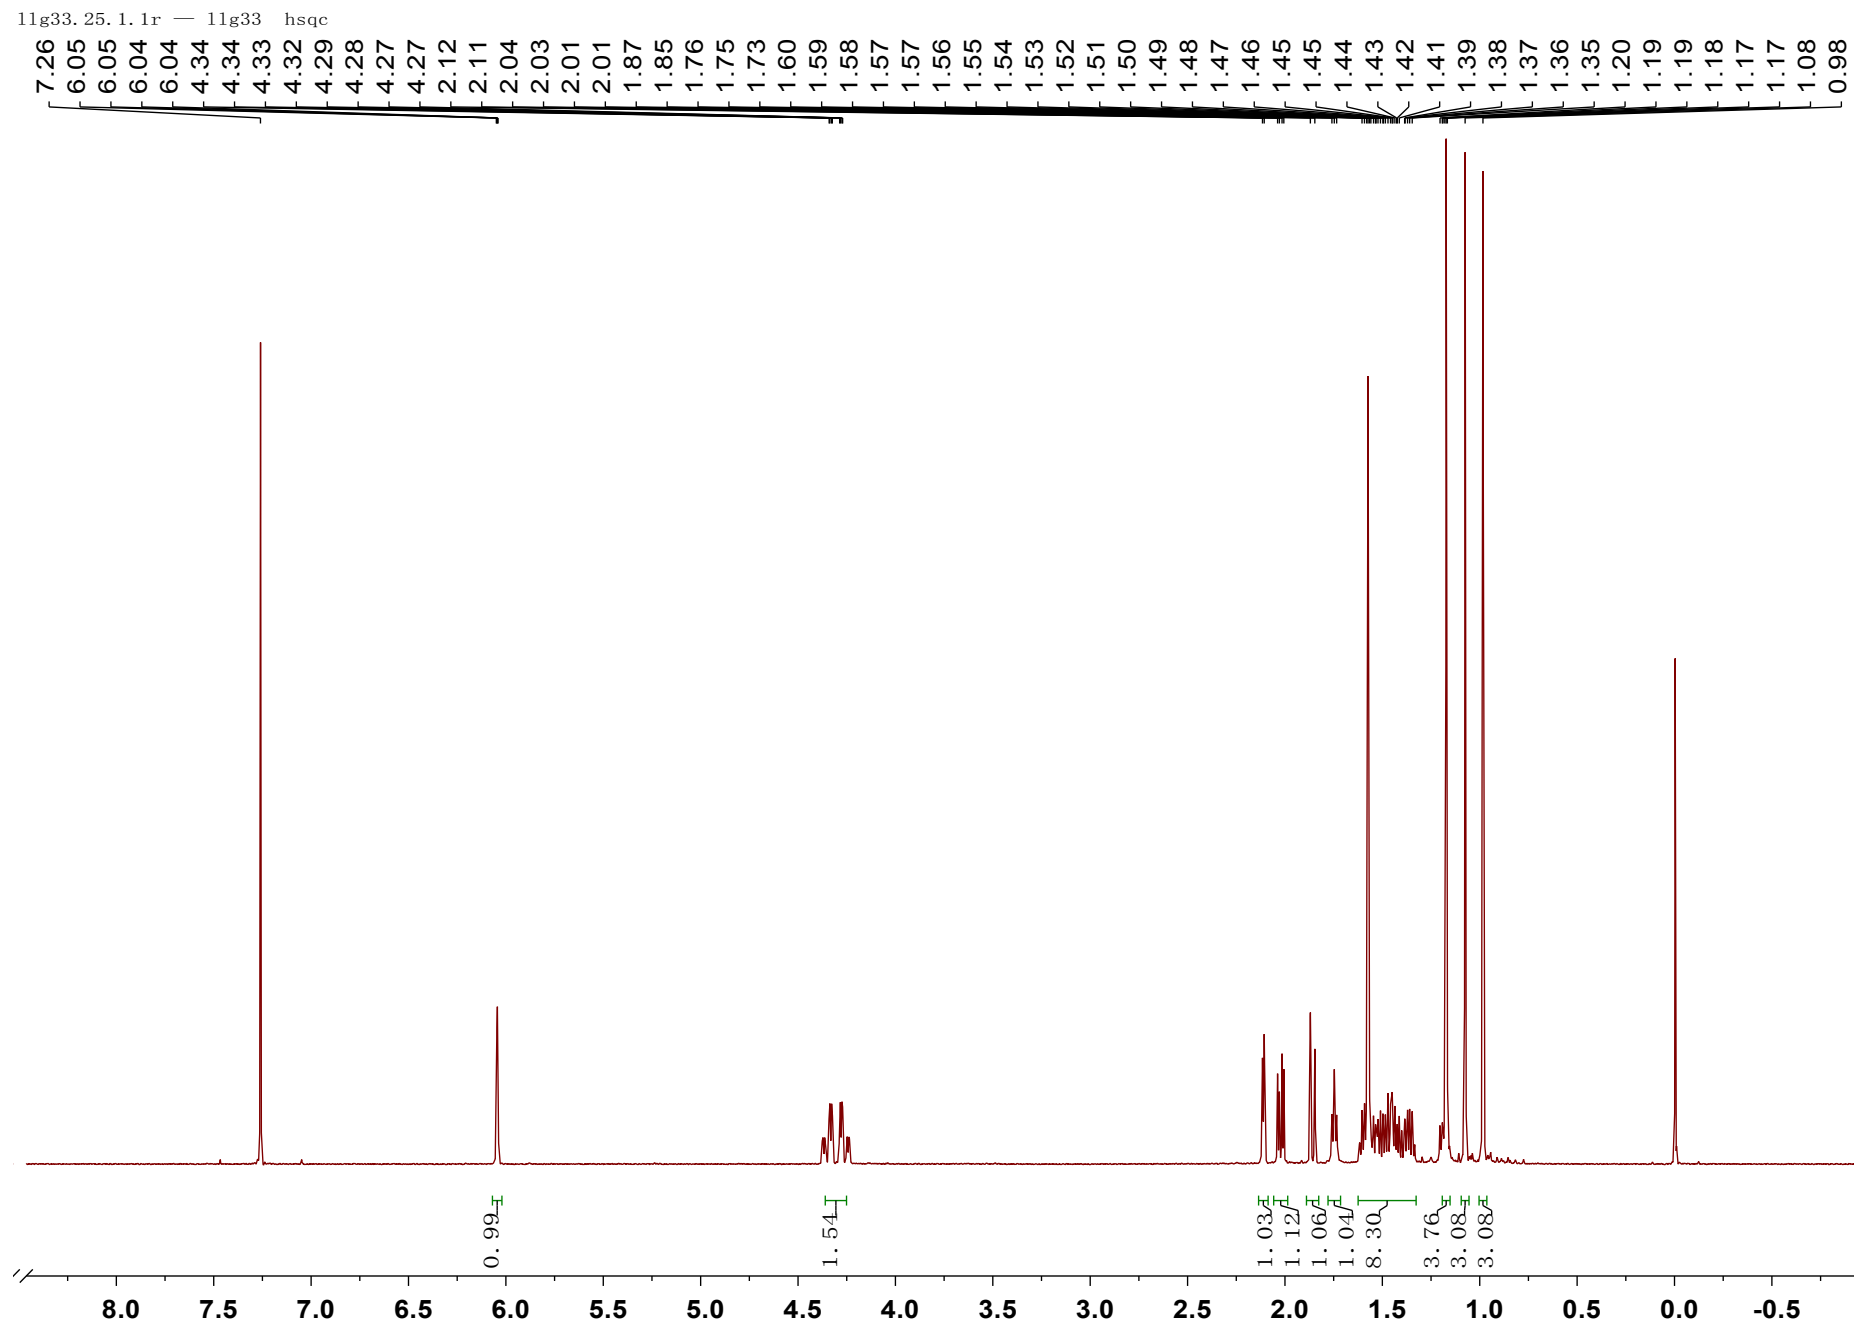

Figure 16S.  $^{13}\text{C}$  NMR and DEPT spectra of **3** (150 MHz,  $\text{CDCl}_3$ )

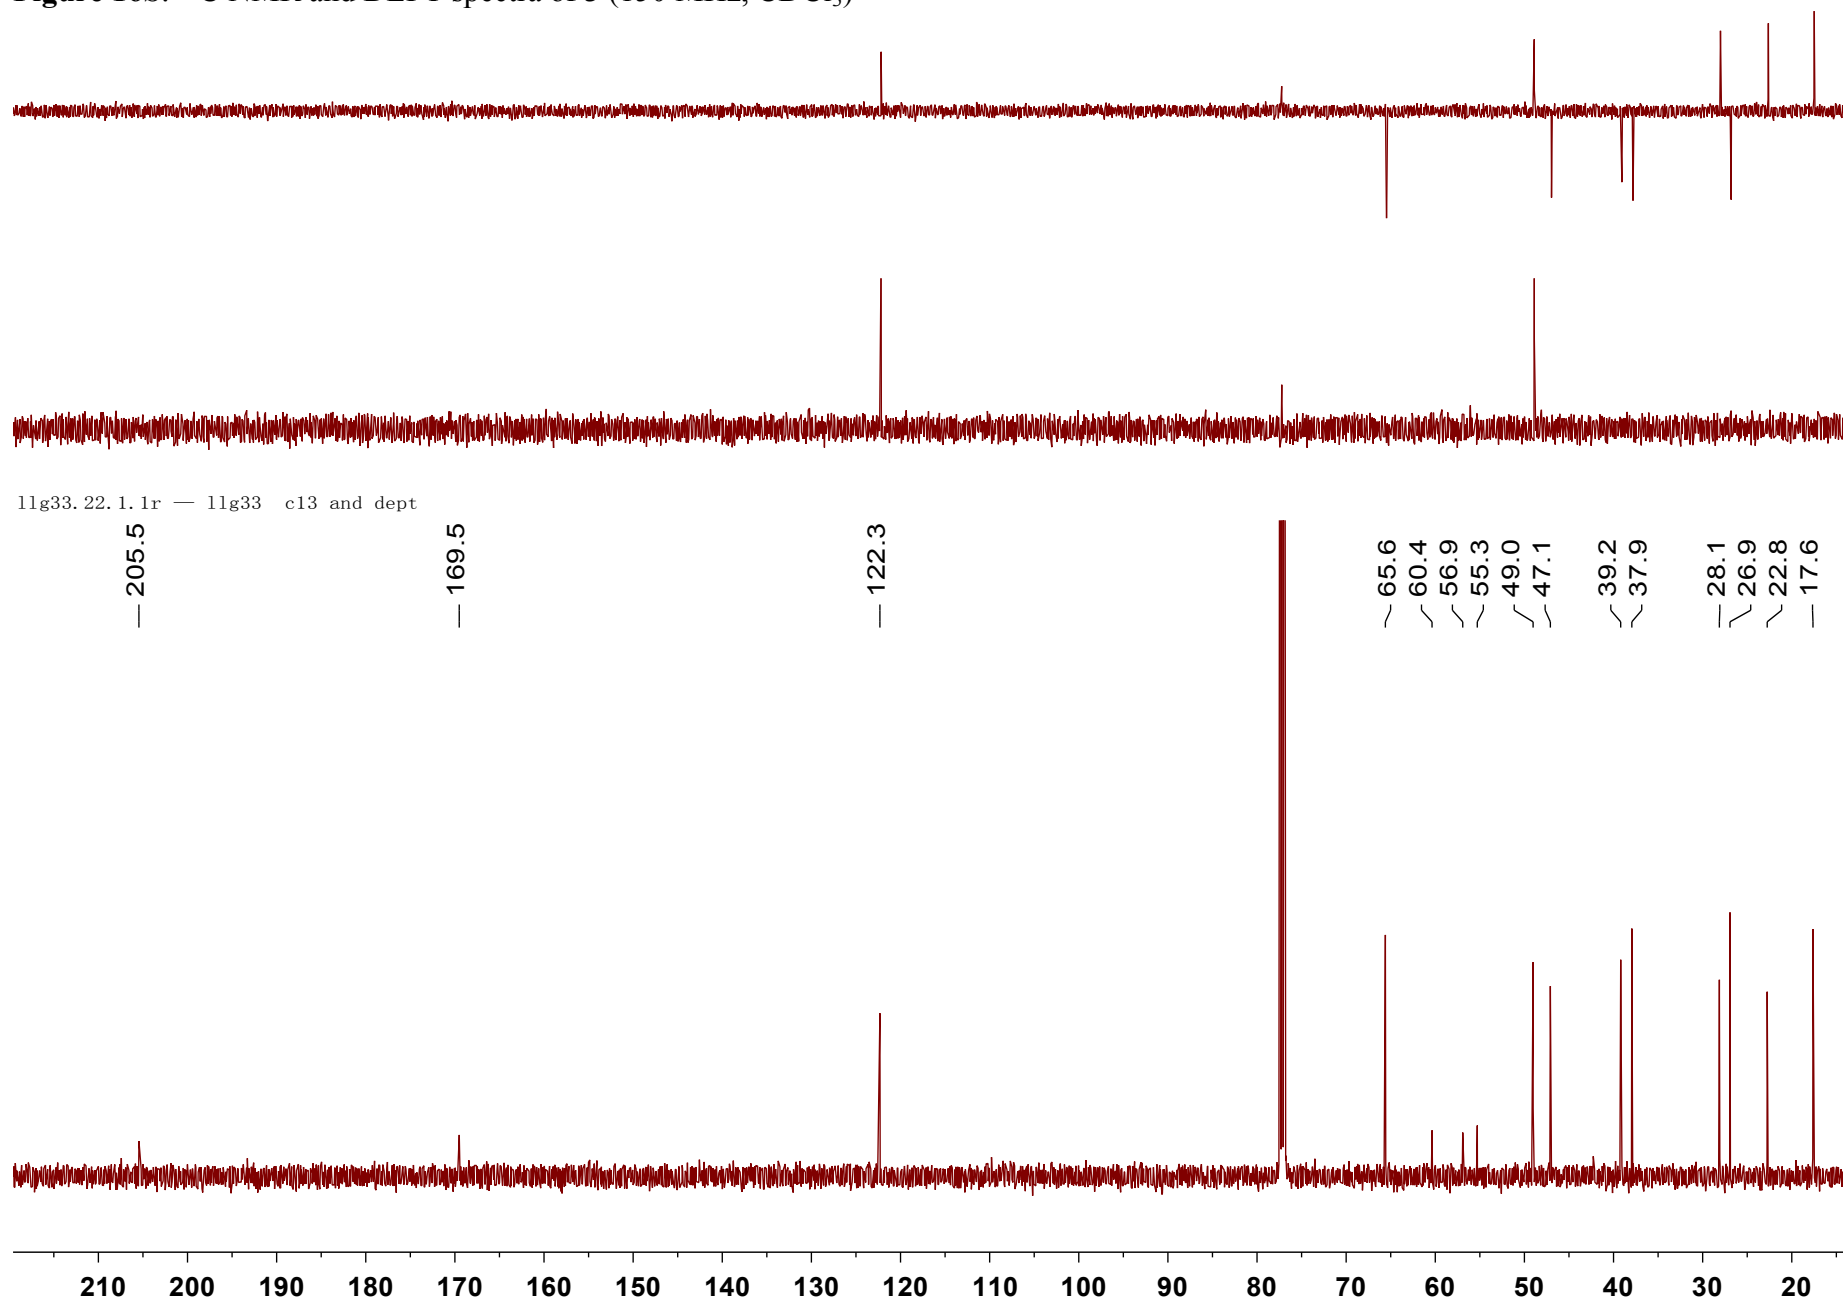

**Figure 17S.** HSQC spectrum of **3** (CDCl<sub>3</sub>)

11g33.27.1.2rr — 11g33 hsqc

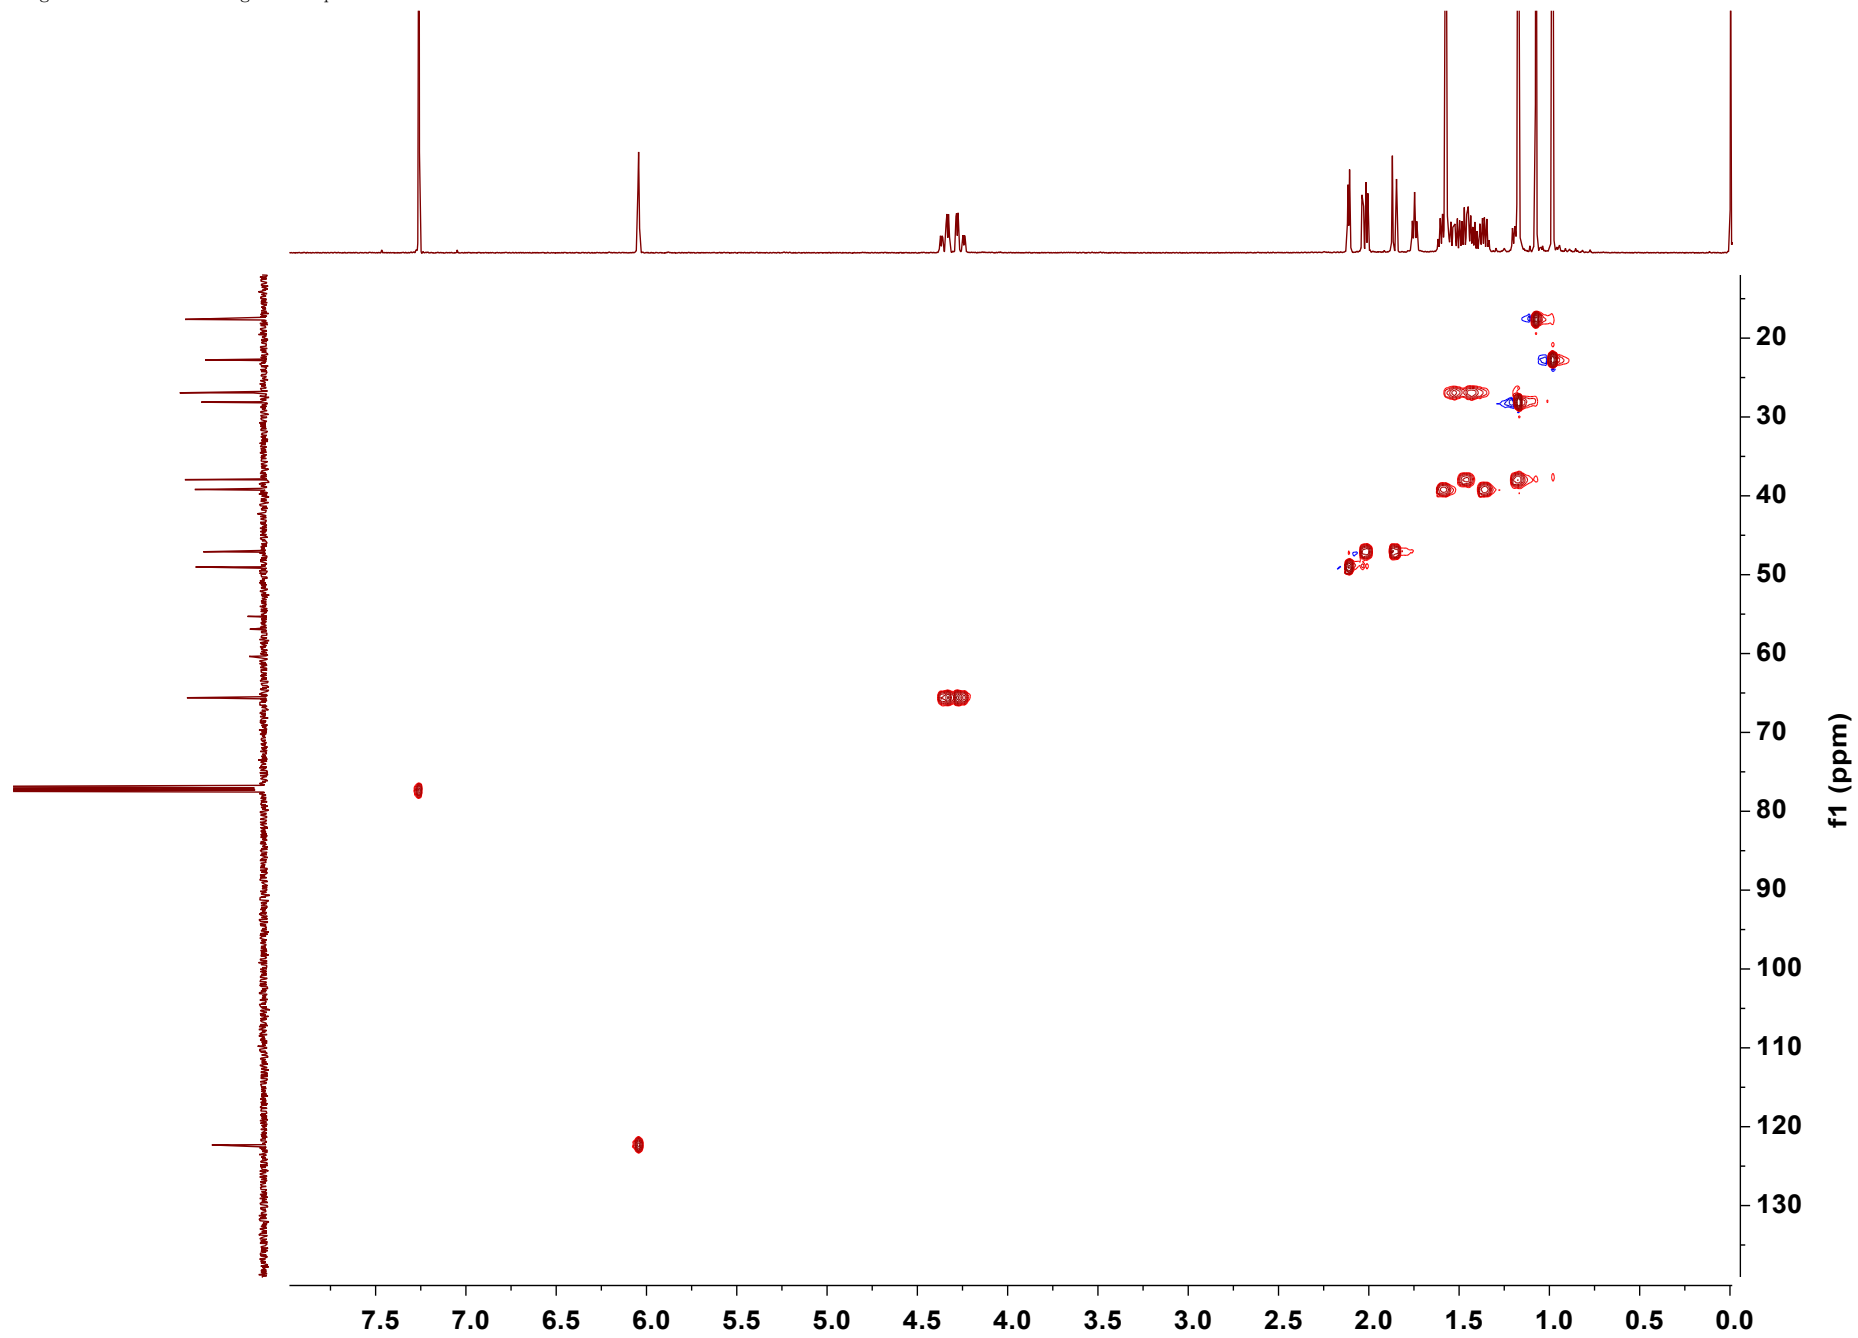

**Figure 18S.**  $^1\text{H}$ - $^1\text{H}$  COSY spectrum of **3** ( $\text{CDCl}_3$ )

11g33.26.1.2rr — 11g33 cosy

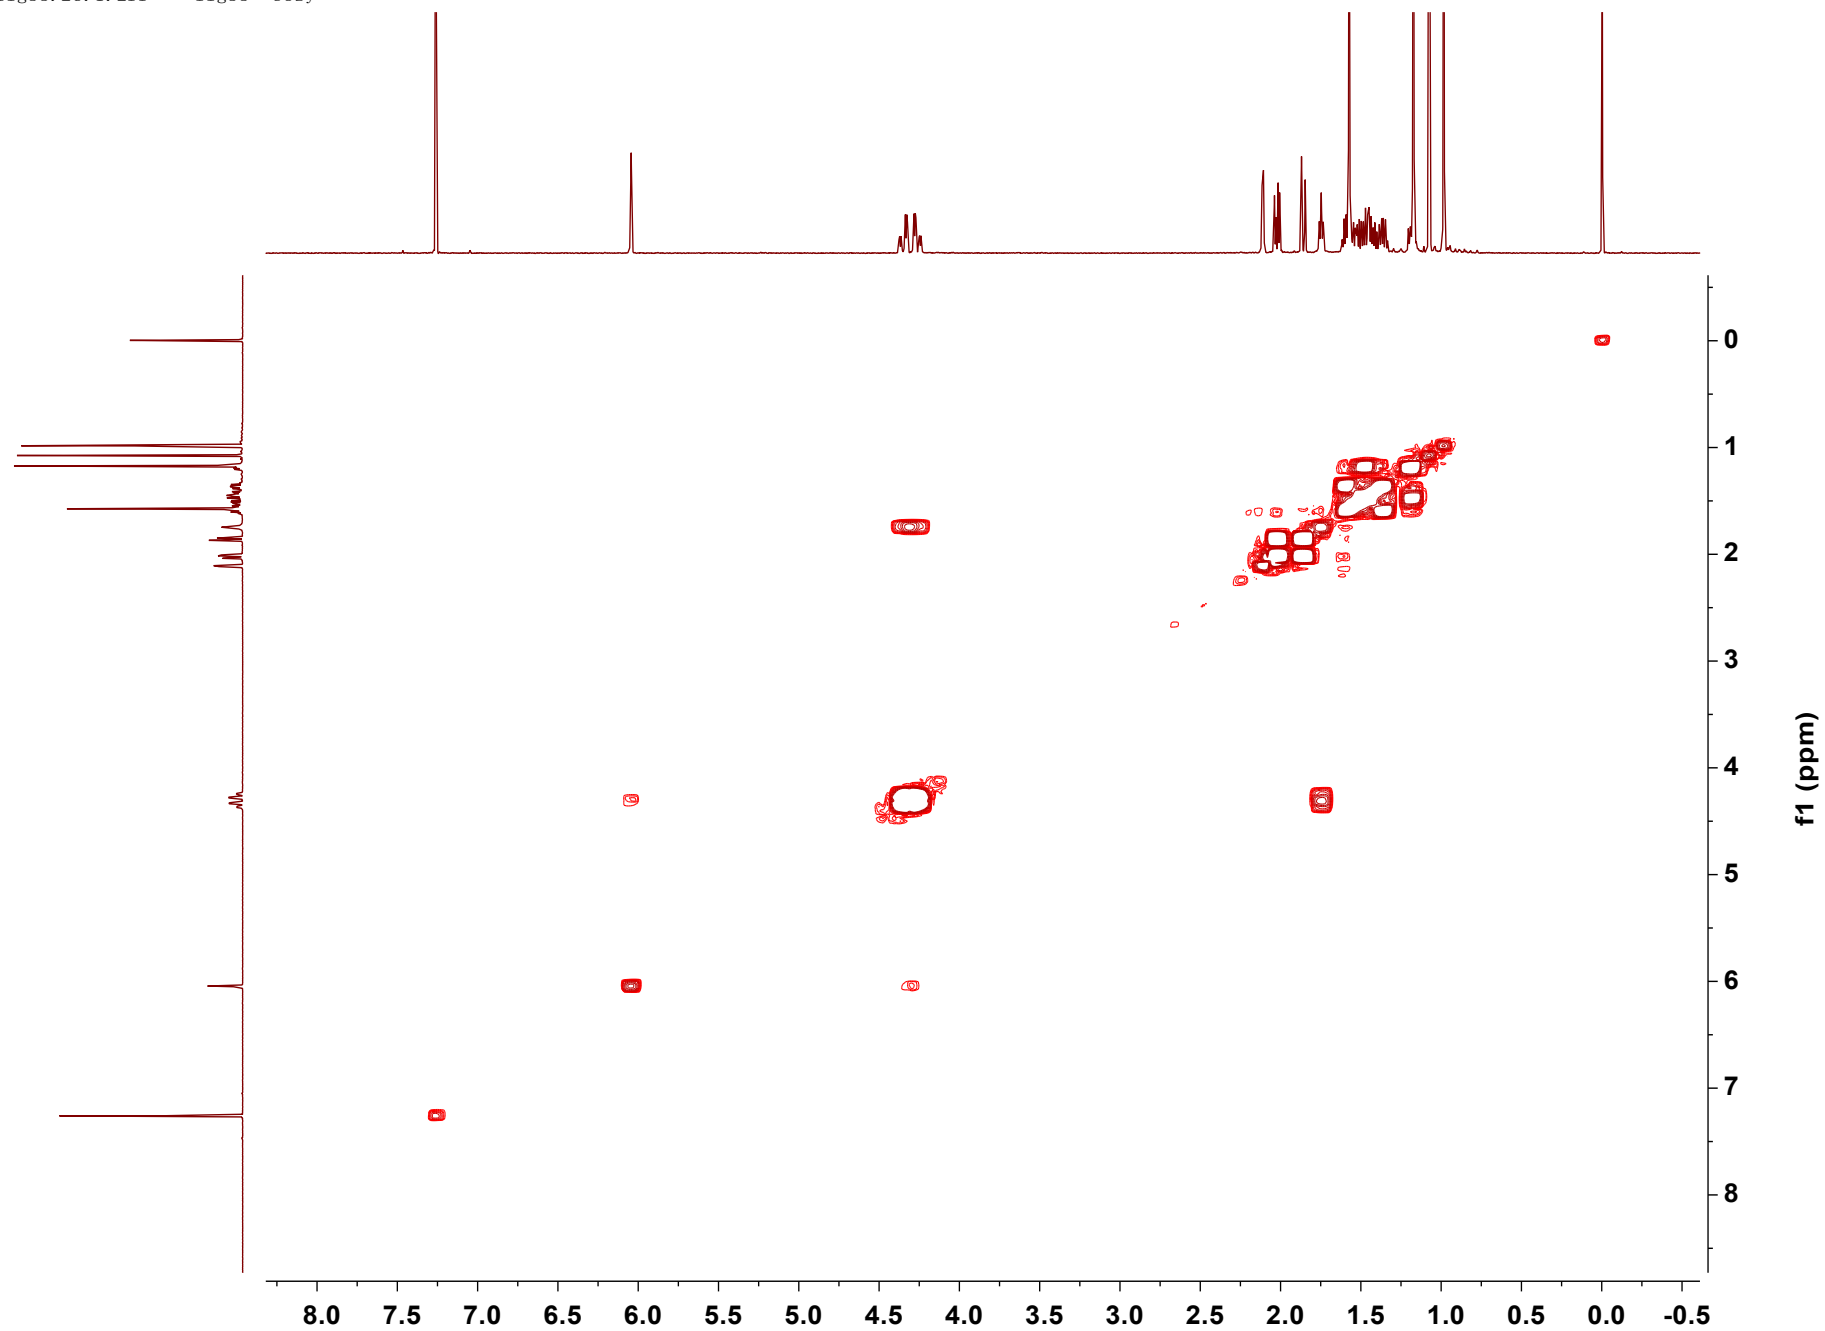

**Figure 19S.** HMBC spectrum of **3** (CDCl<sub>3</sub>)

11g33.28.1.2rr — 11g33 hmbc

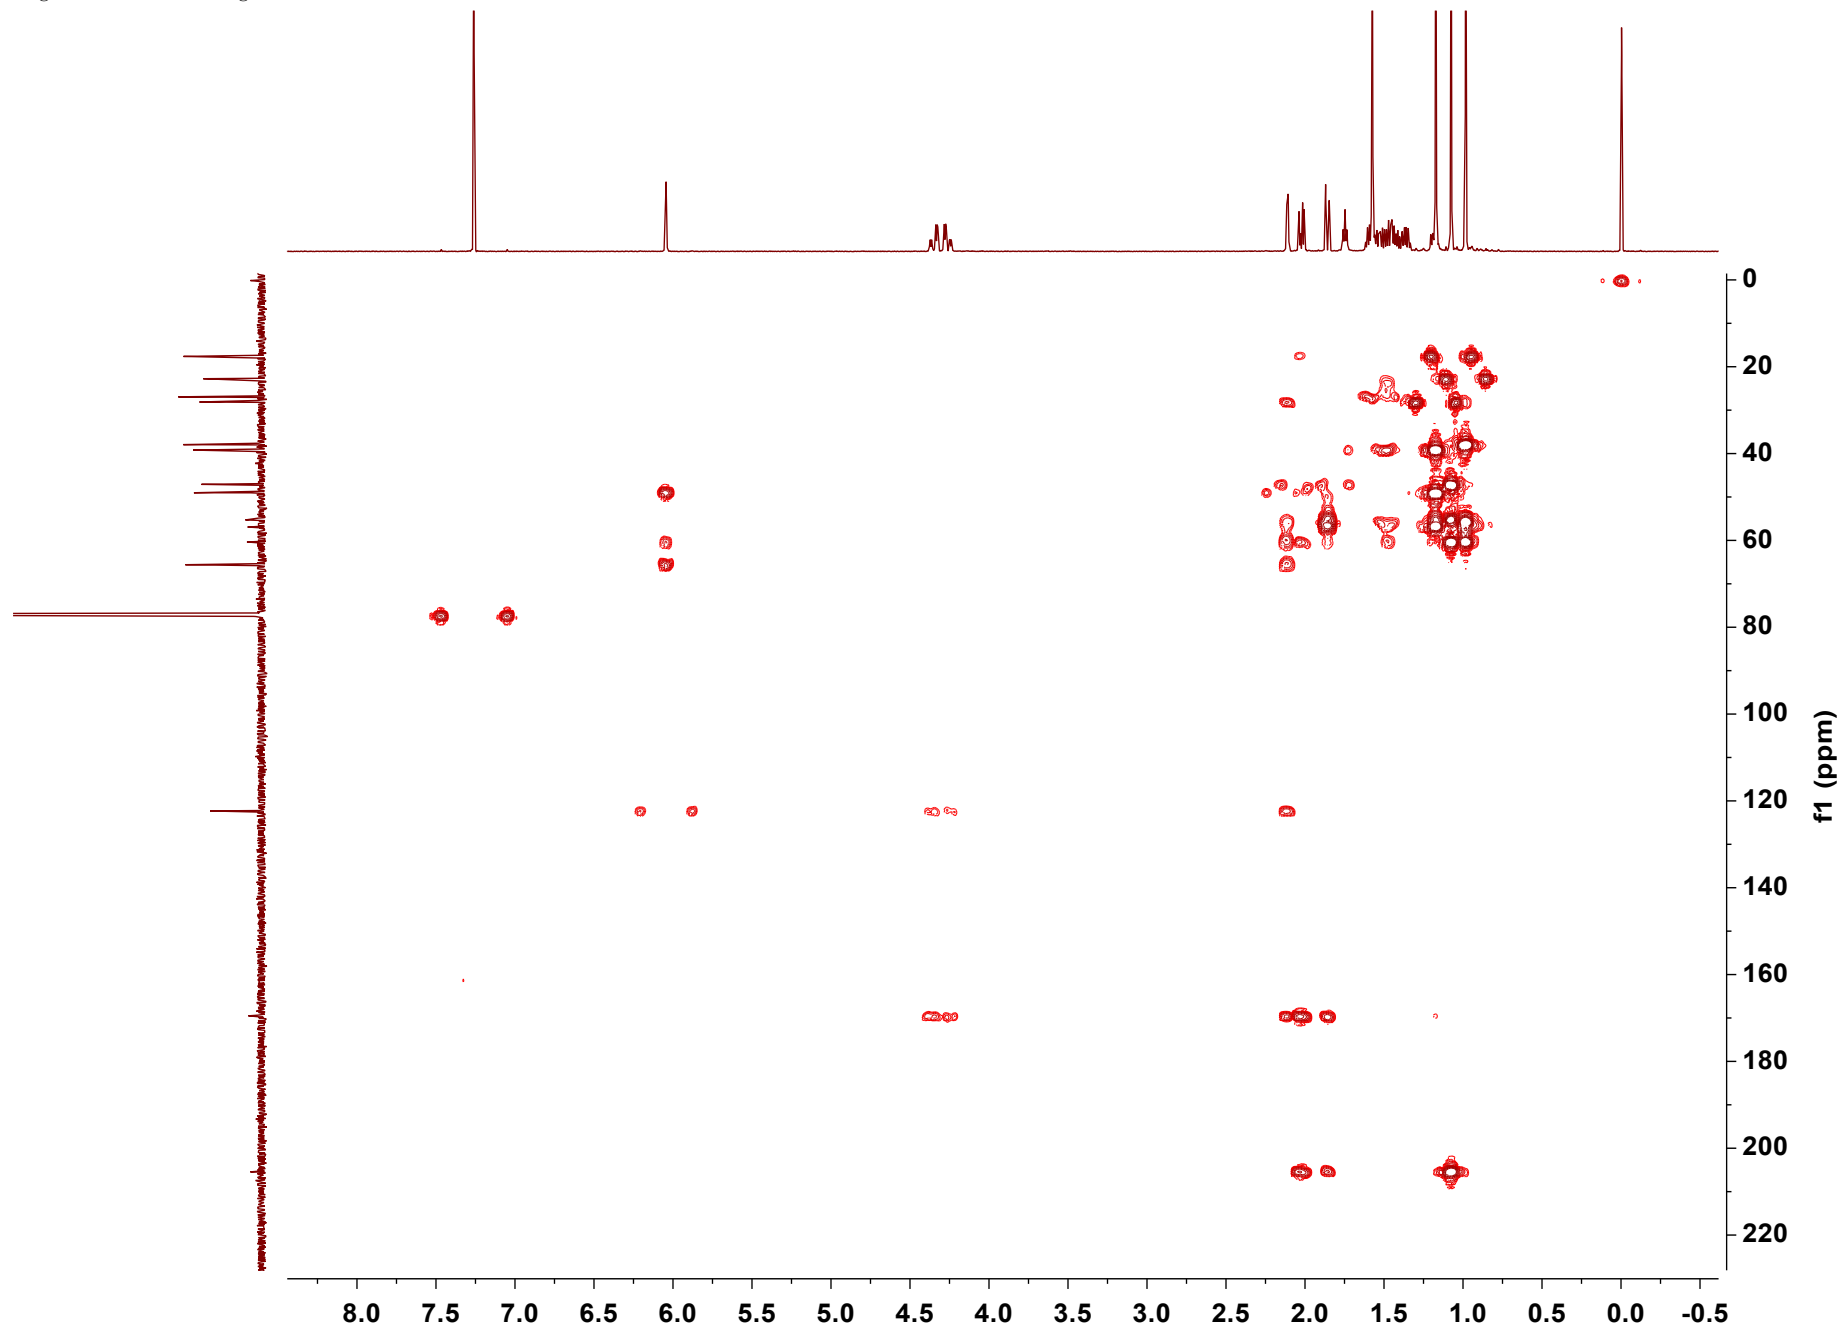



**Figure 20S.** ROESY spectrum of **3** (CDCl<sub>3</sub>)

11g33.29.1.2rr — 11g33 roesy

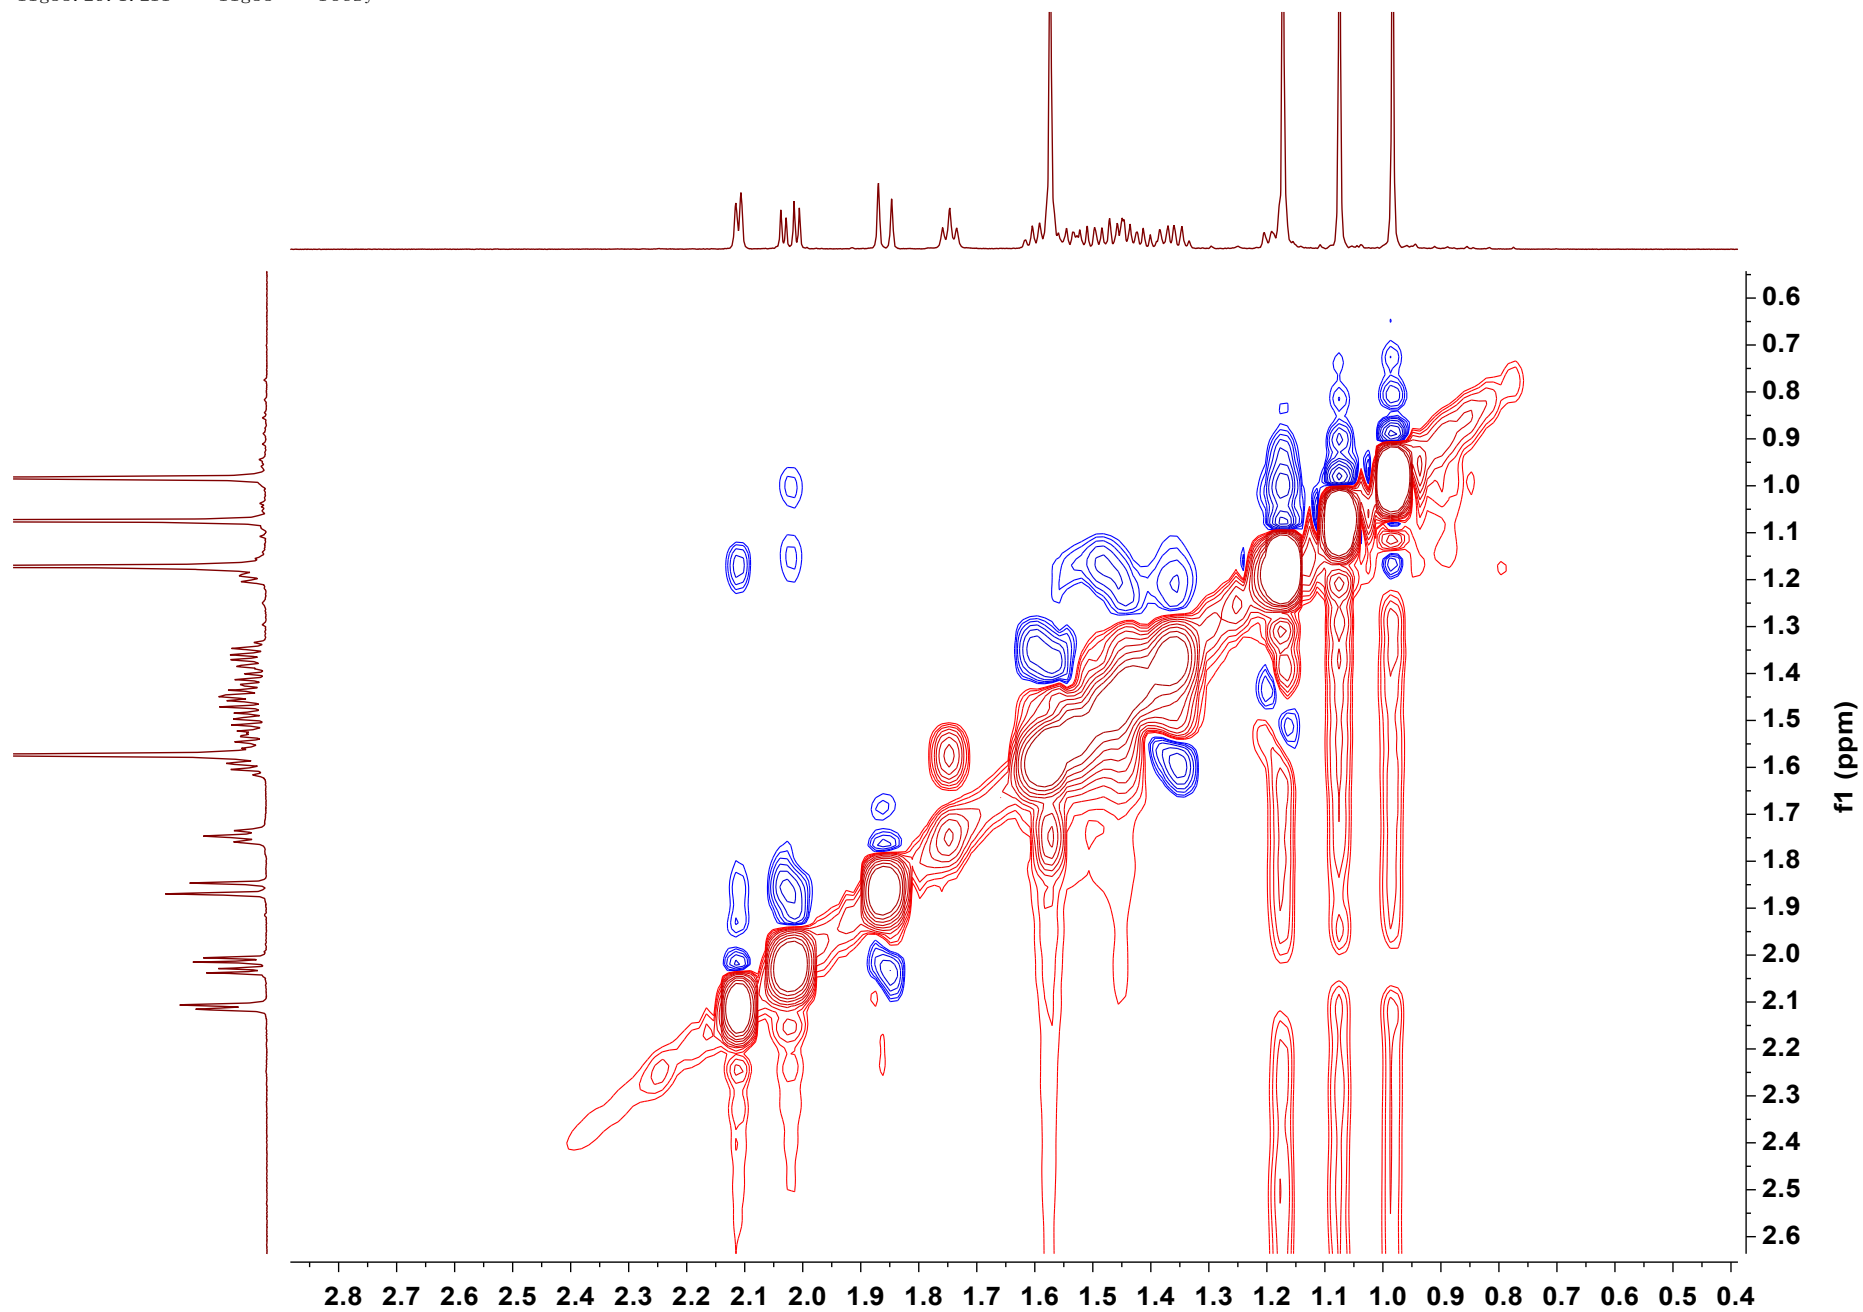

Figure 21S. HRESIMS (+) report of 3

### Qualitative Analysis Report

|                        |              |               |                     |
|------------------------|--------------|---------------|---------------------|
| Data Filename          | llg33.d      | Sample Name   | llg33               |
| Sample Type            | Sample       | Position      | P1-C8               |
| Instrument Name        | Instrument 1 | User Name     |                     |
| Acq Method             | s-HRp.m      | Acquired Time | 3/9/2017 4:47:34 PM |
| IRM Calibration Status | Success      | DA Method     | sibu.m              |
| Comment                |              |               |                     |

|                |                             |
|----------------|-----------------------------|
| Sample Group   | Info.                       |
| Acquisition SW | 6200 series TOF/6500 series |
| Version        | Q-TOF B.05.01 (85125.2)     |

#### User Spectra

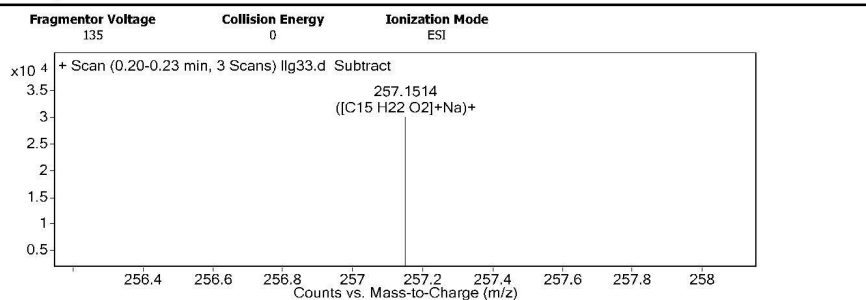

| m/z       | z | Abund    | Formula    | Ion     |
|-----------|---|----------|------------|---------|
| 122.0814  | 1 | 9480.3   |            |         |
| 257.1514  | 1 | 30054.17 | C15 H22 O2 | (M+Na)+ |
| 258.1545  | 1 | 4738.96  | C15 H22 O2 | (M+Na)+ |
| 273.1274  | 1 | 7475.14  |            |         |
| 317.1736  | 1 | 6282.44  |            |         |
| 471.1962  | 1 | 13362.15 |            |         |
| 472.2004  | 1 | 3624.74  |            |         |
| 1122.4535 | 1 | 4067.84  |            |         |

#### Formula Calculator Element Limits

| Element | Min | Max |
|---------|-----|-----|
| C       | 3   | 60  |
| H       | 0   | 120 |
| O       | 0   | 30  |

#### Formula Calculator Results

| Formula    | CalculatedMass | CalculatedMz | Mz       | Diff. (mDa) | Diff. (ppm) | DBE    |
|------------|----------------|--------------|----------|-------------|-------------|--------|
| C15 H22 O2 | 234.1620       | 257.1512     | 257.1514 | -0.4        | -1.6        | 5.0000 |

--- End Of Report ---

Figure 22S. <sup>1</sup>H NMR spectrum of 4 (600 MHz, CD<sub>3</sub>OD)

11gal4a.1.1.1r - 11gal4a

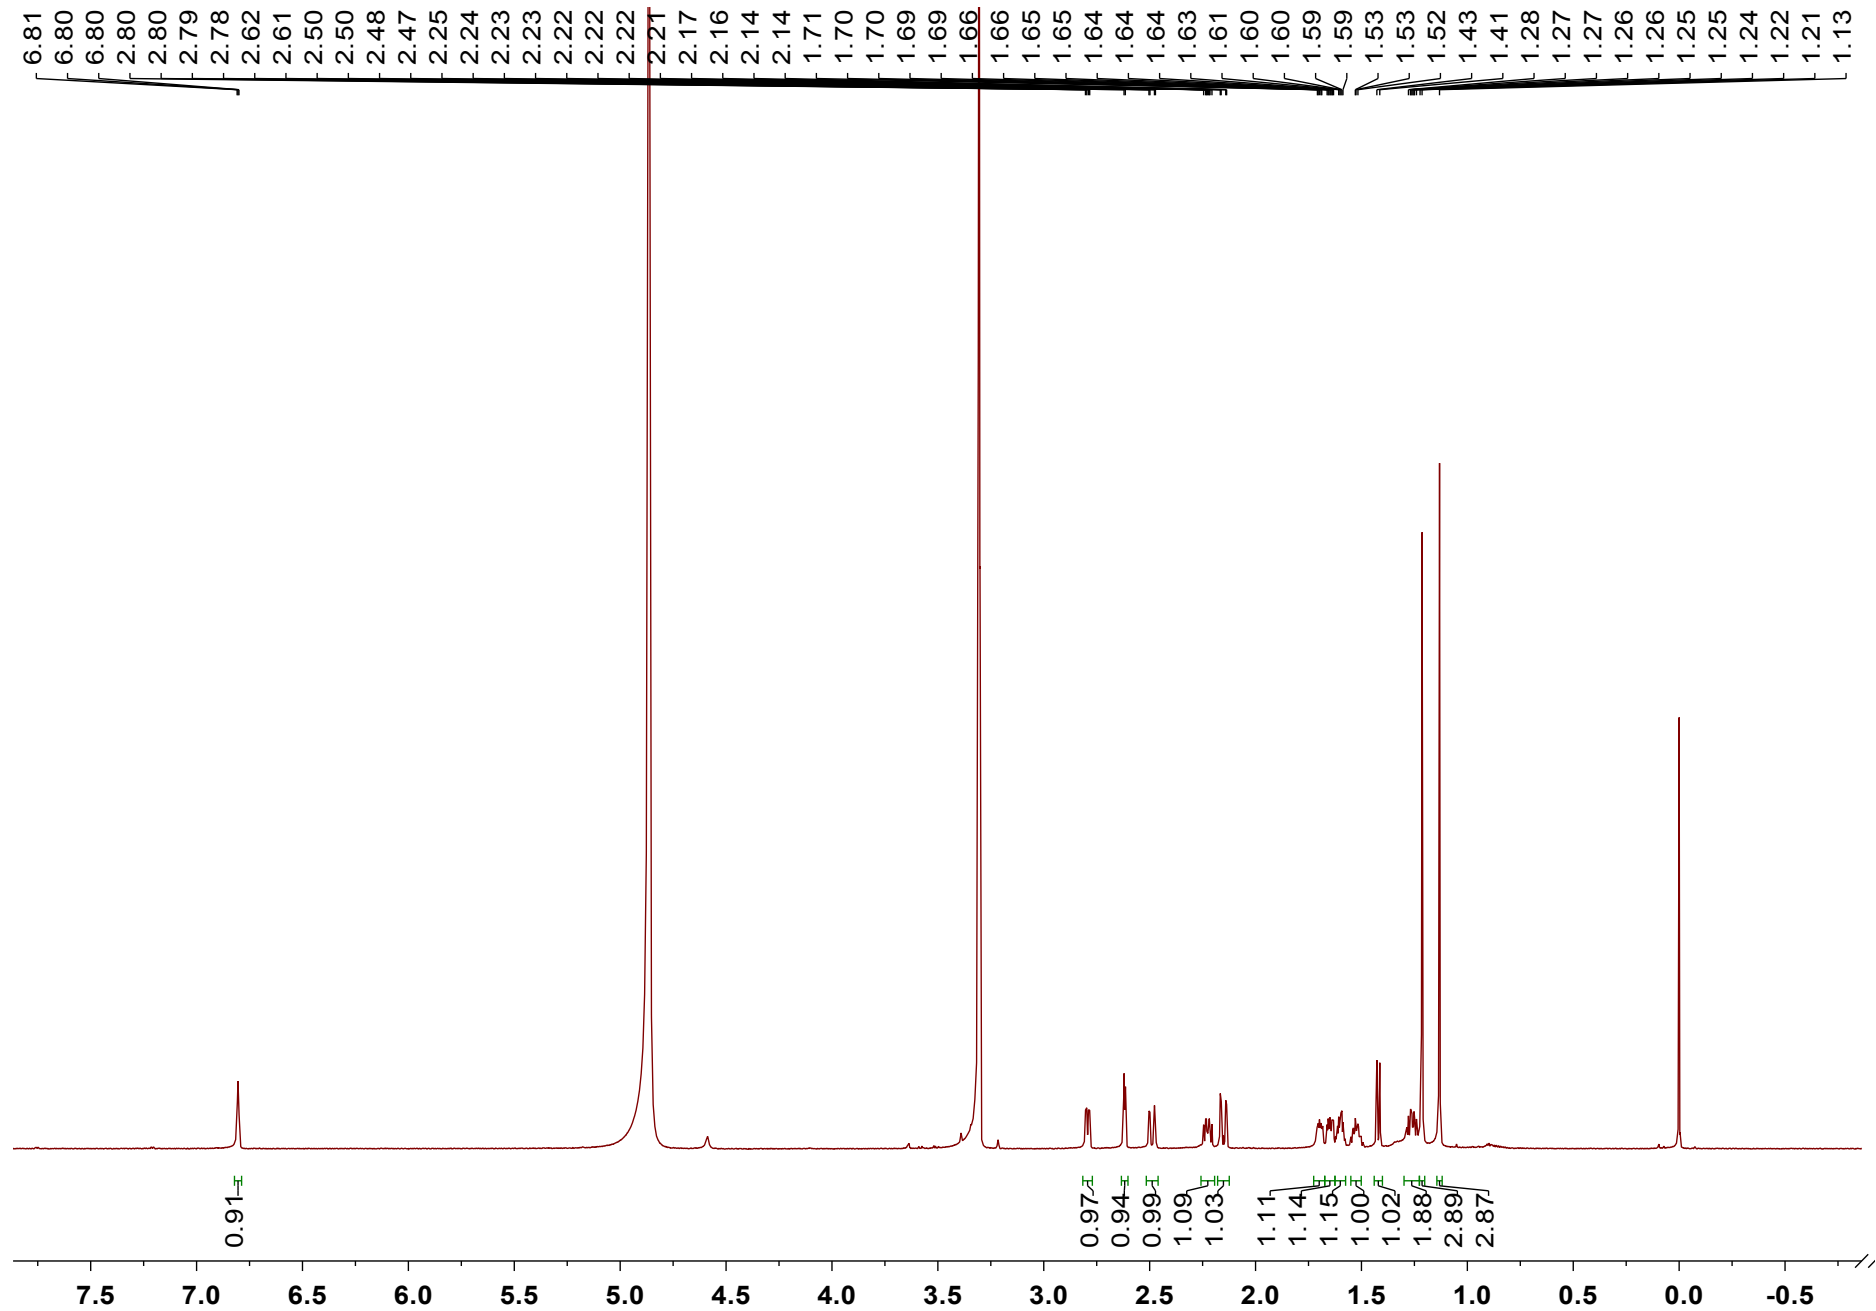

**Figure 23S.**  $^{13}\text{C}$  NMR and DEPT spectra of **4** (150 MHz,  $\text{CD}_3\text{OD}$ )

1lga14a. 3. 1. 1r — 1lga14a

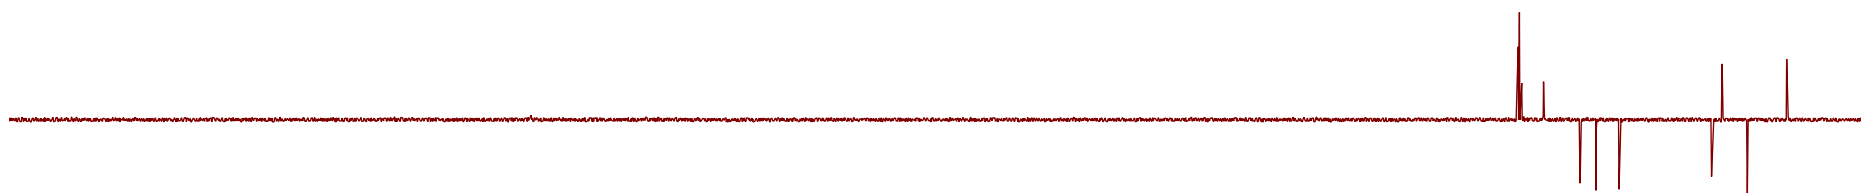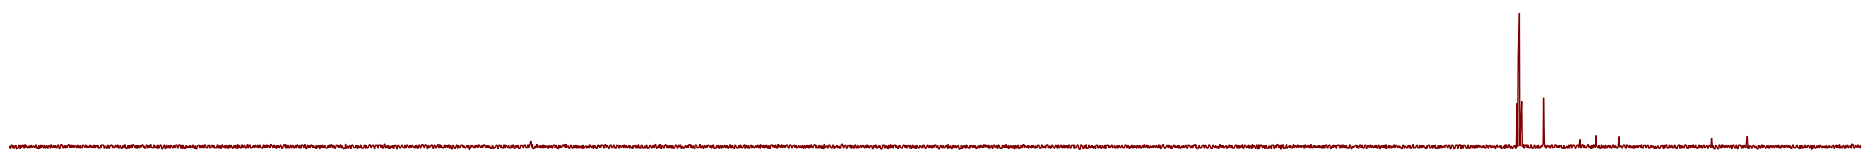

1lga14a. 2. 1. 1r — 1lga14a

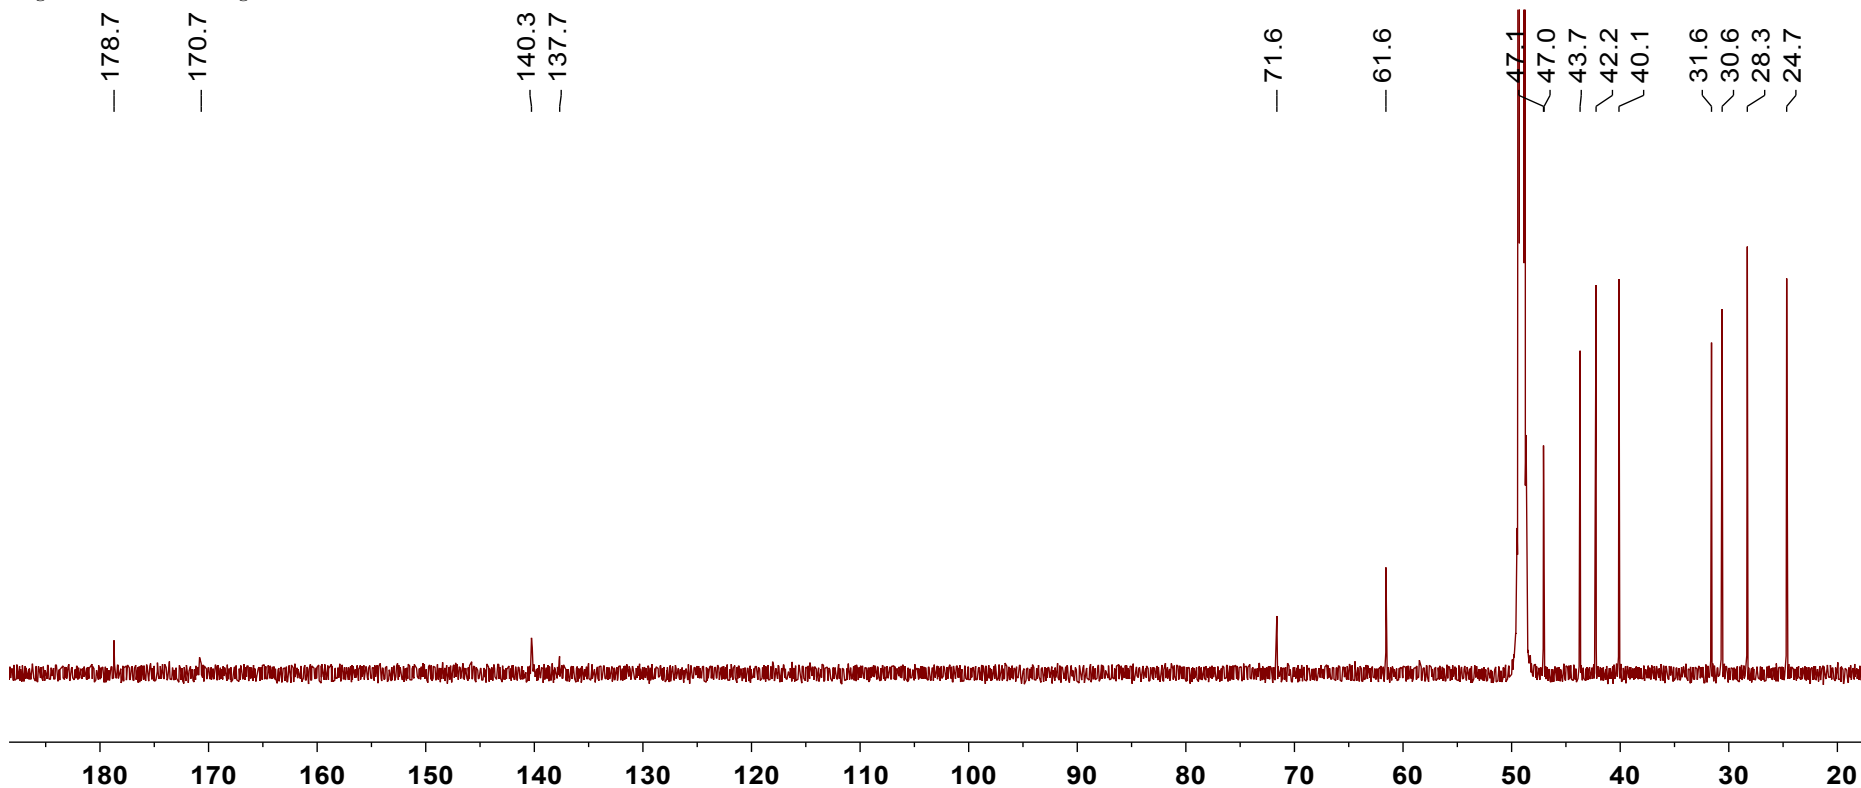

Figure 24S. HSQC spectrum of 4 (CD<sub>3</sub>OD)

11ga14a.40.1.2rr — HSQGP-sxhuo MeOD D:\\ root 9

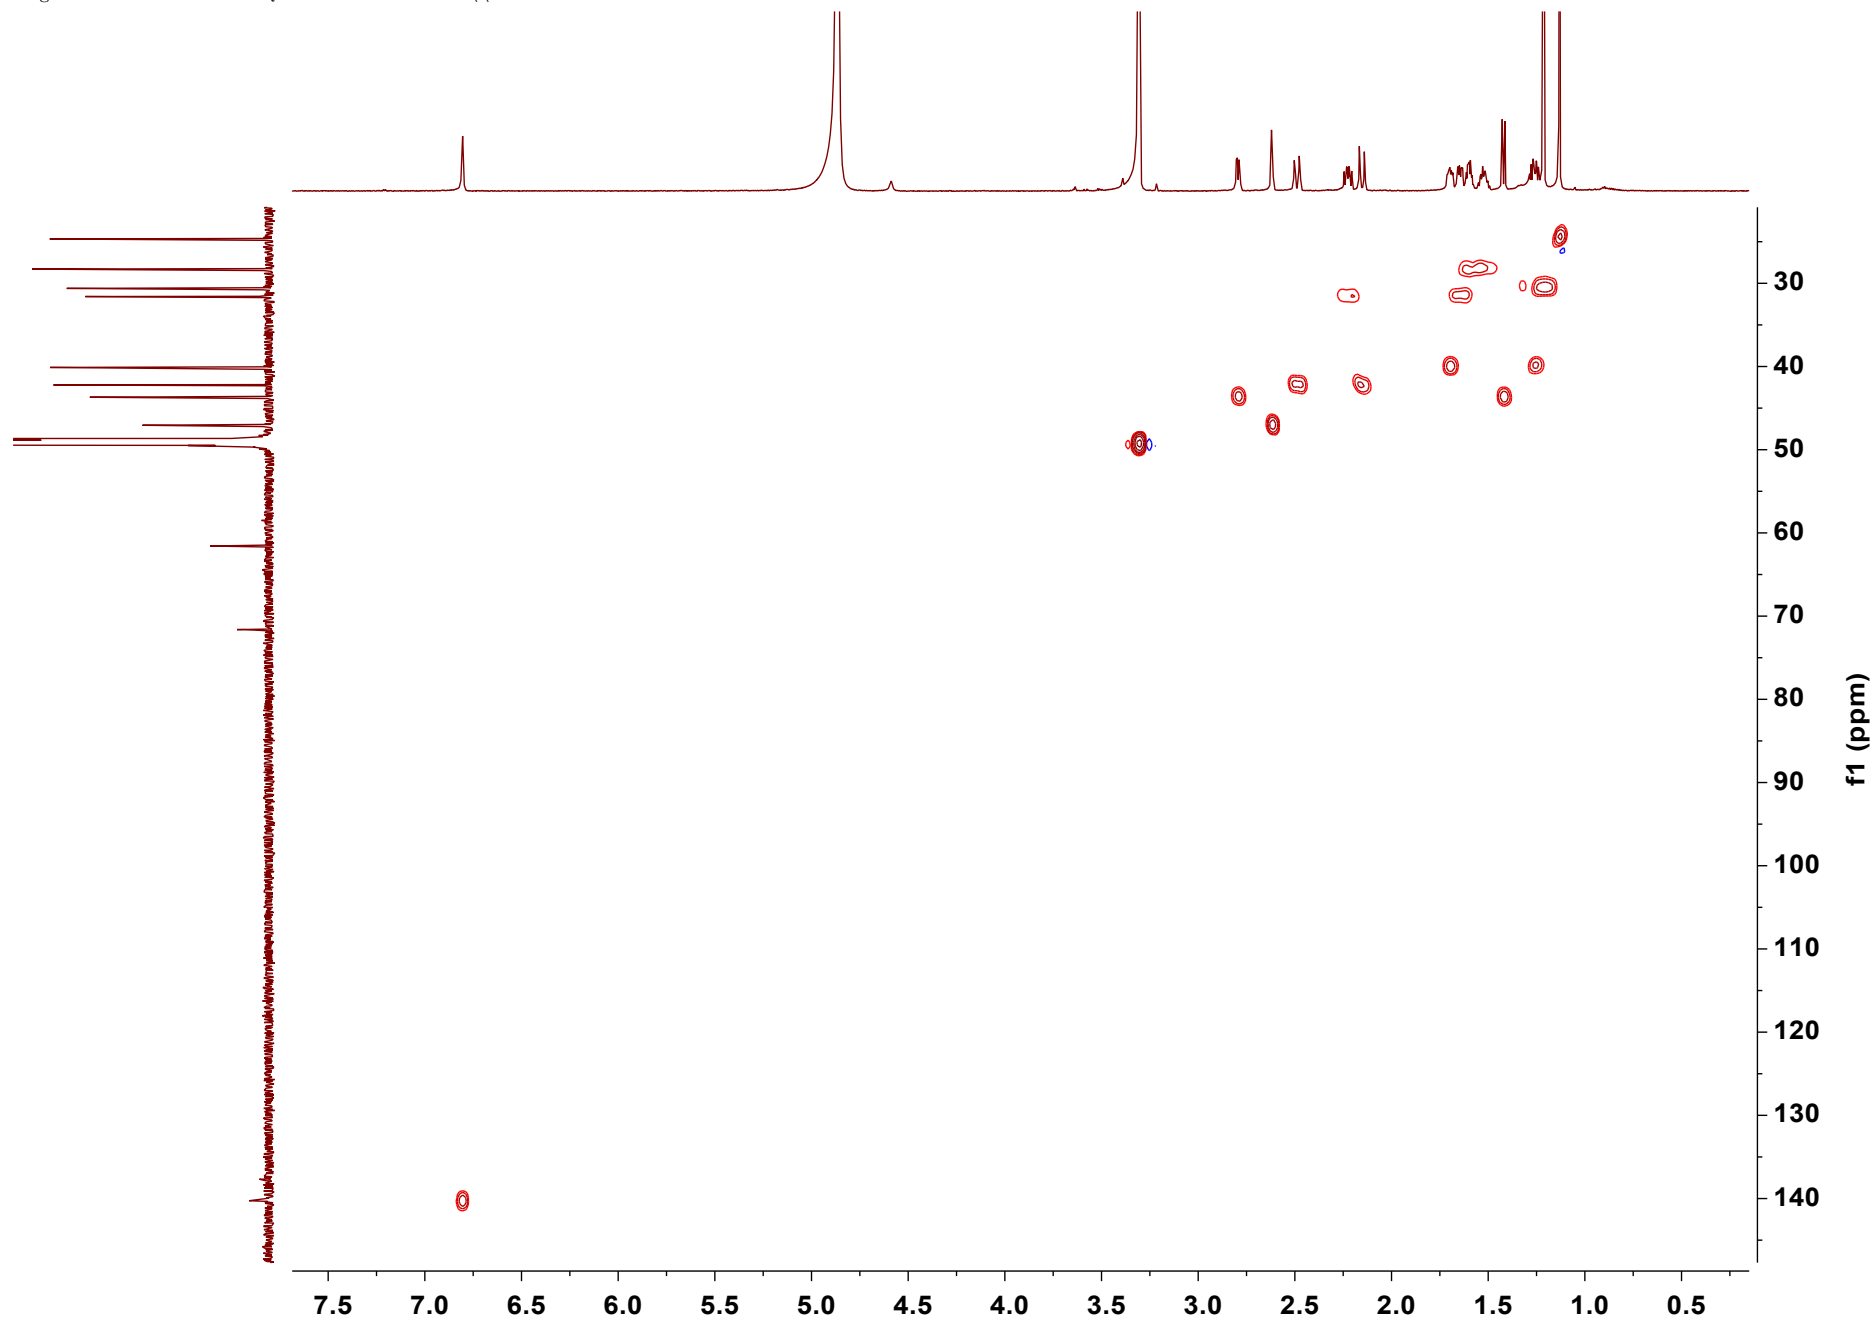

**Figure 25S.**  $^1\text{H}$ - $^1\text{H}$  COSY spectrum of **4** ( $\text{CD}_3\text{OD}$ )

1lga14a.10.1.1.2rr — COSY-sxhuo MeOD D:\ root 9

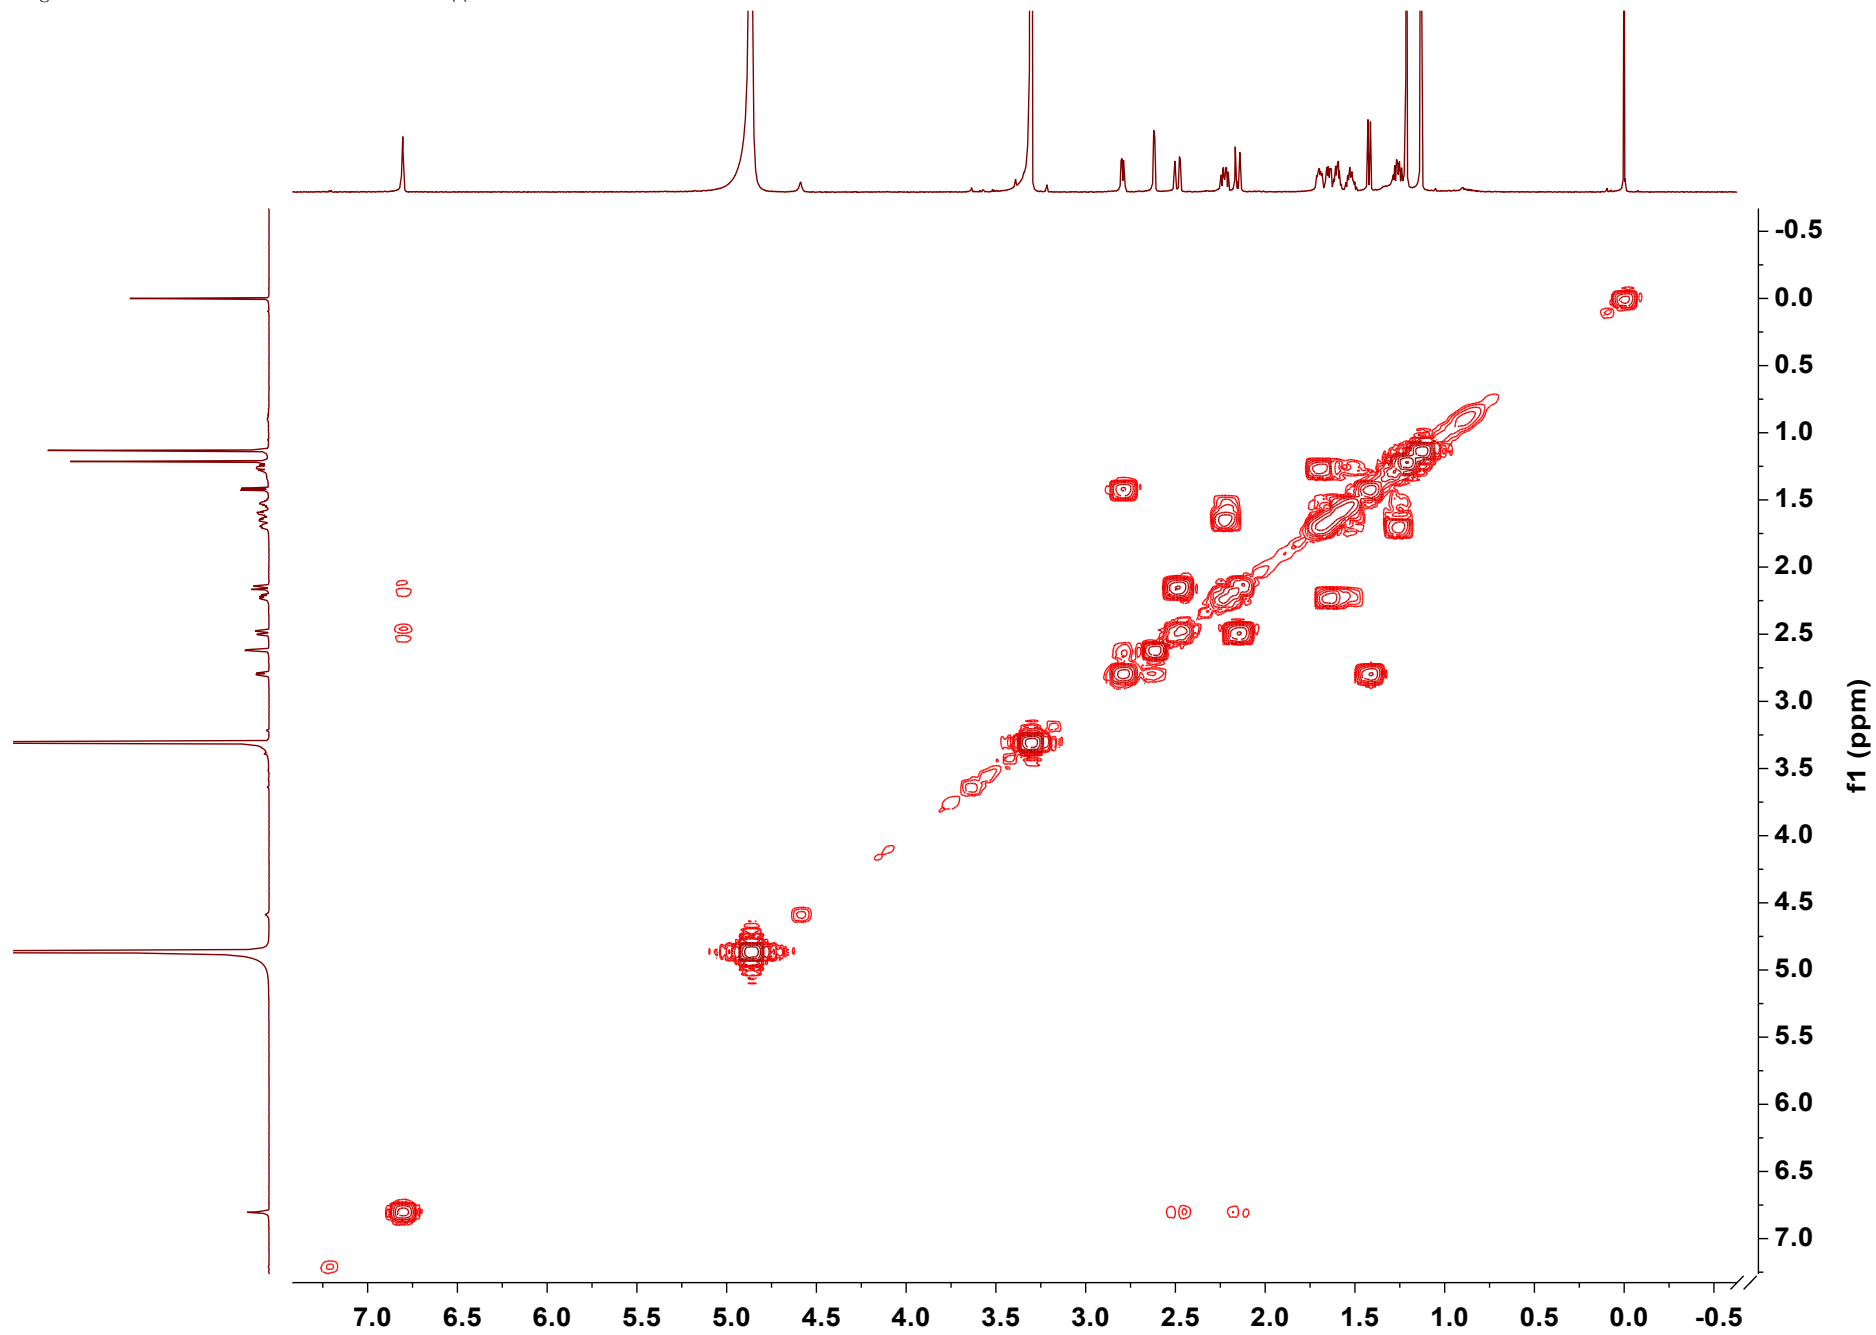

Figure 26S. HMBC spectrum of 4 (CD<sub>3</sub>OD)

11ga14a.10.1.2rr — 11ga14a

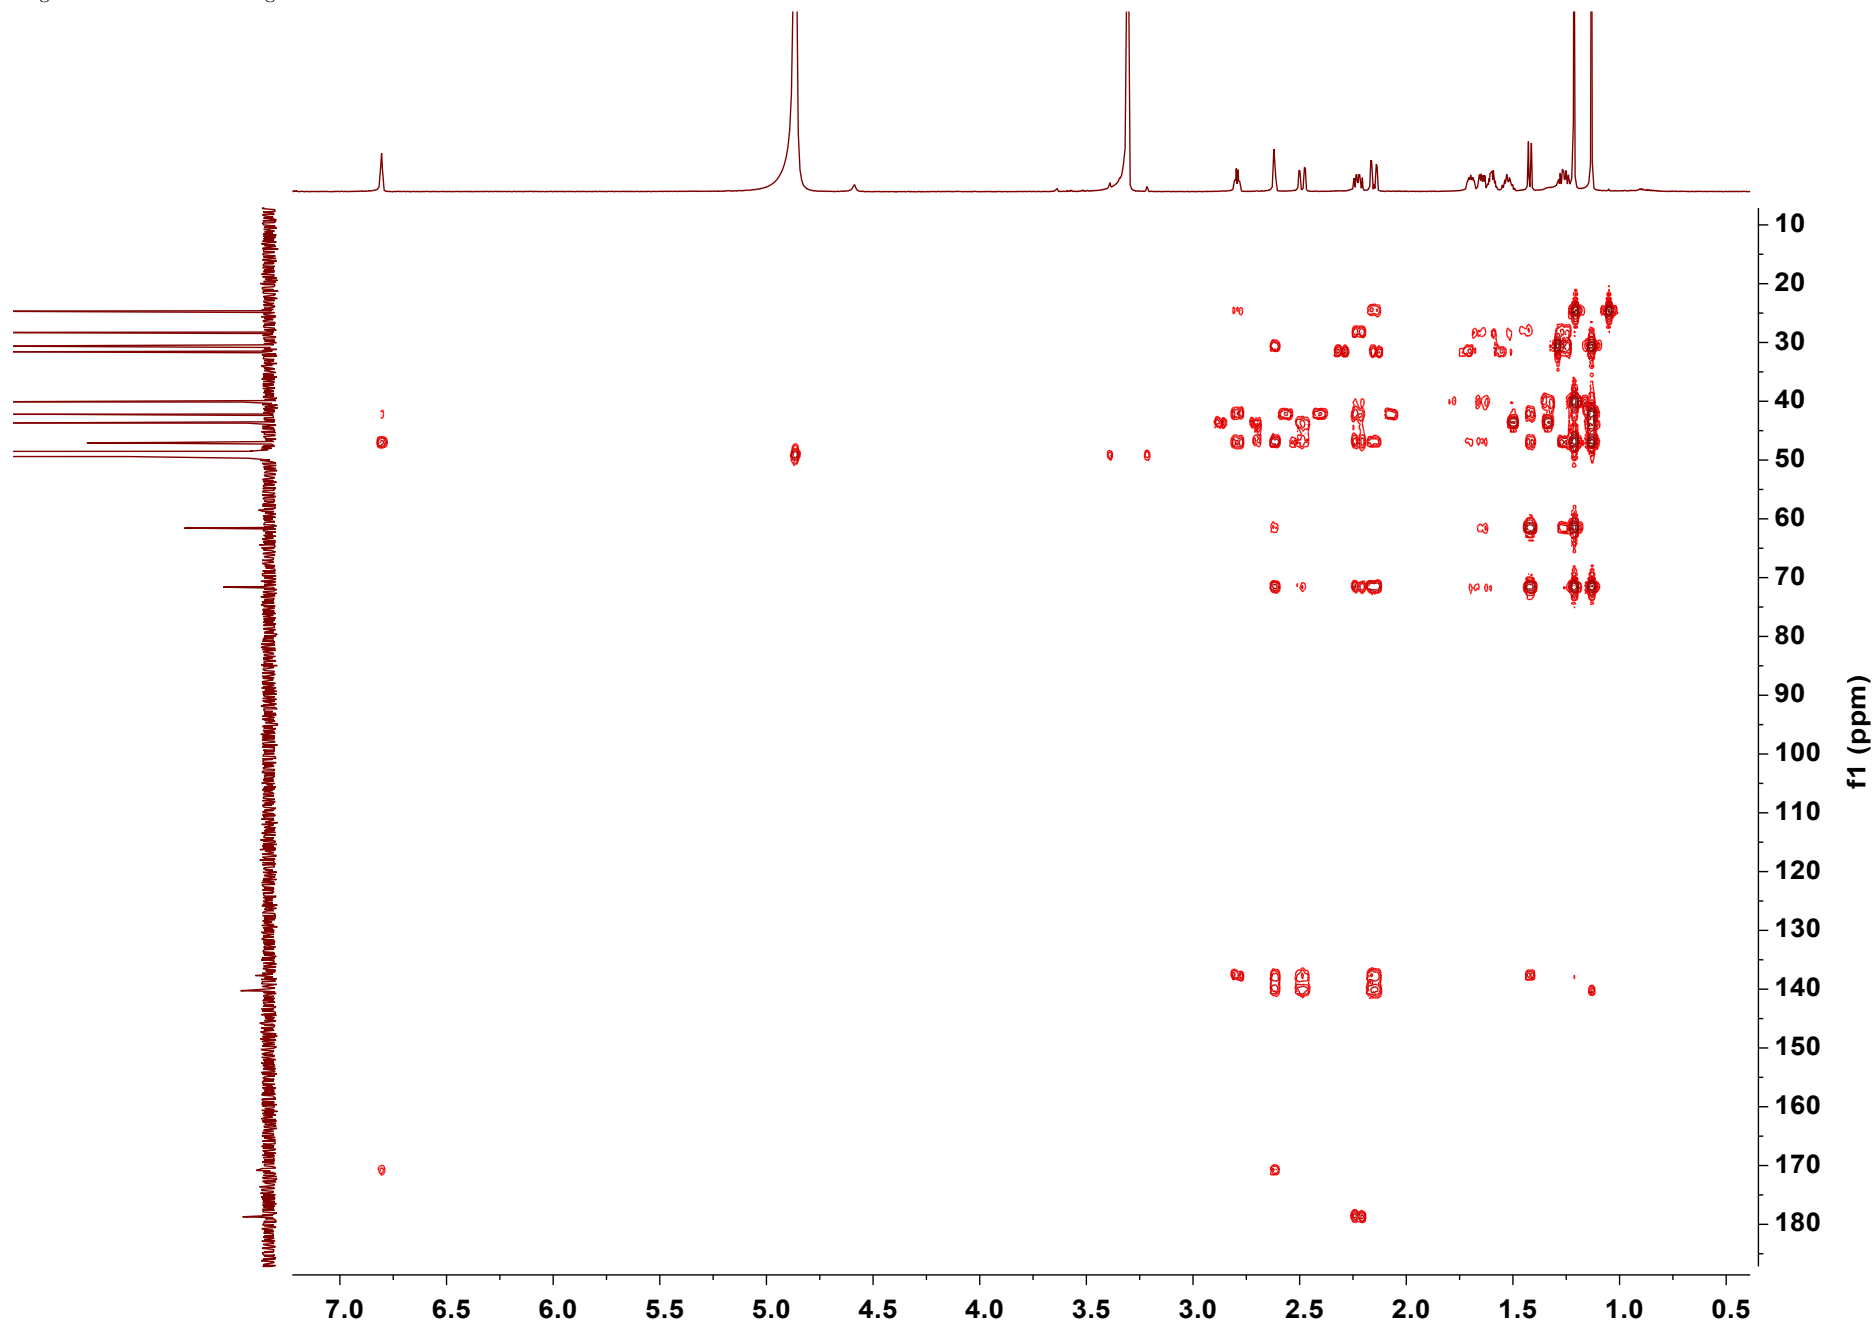

**Figure 27S.** ROESY spectrum of **4** (CD<sub>3</sub>OD)

11ga14a.14.1.2rr — ROESYPHPR-sxhuo MeOD D:\ \ root 9

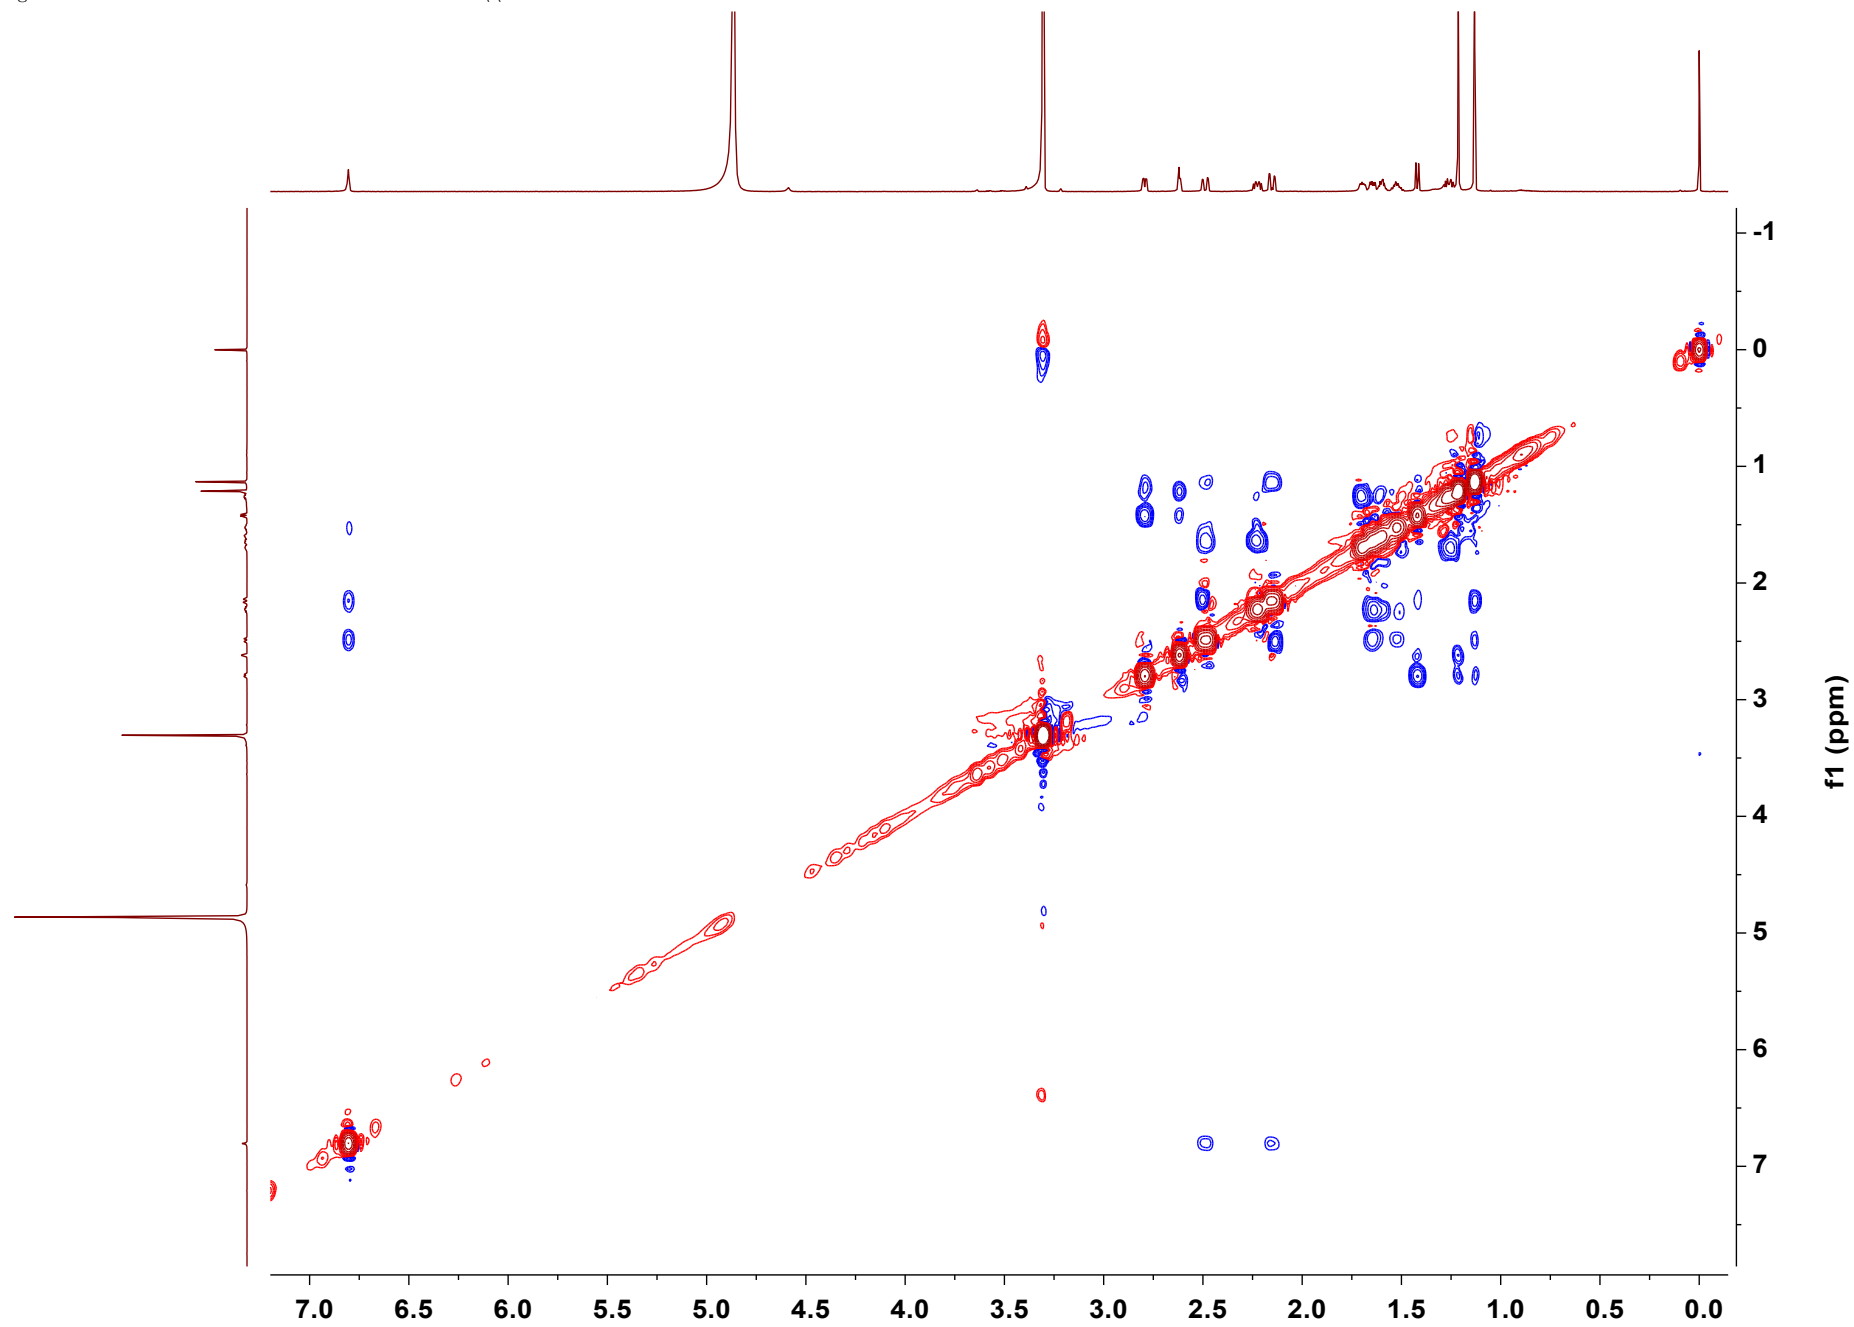



Figure 28S. HRESIMS (+) report of 4

### Qualitative Analysis Report

|                               |              |                      |                        |
|-------------------------------|--------------|----------------------|------------------------|
| <b>Data Filename</b>          | llga14a.d    | <b>Sample Name</b>   | llga14a                |
| <b>Sample Type</b>            | Sample       | <b>Position</b>      | P2-A2                  |
| <b>Instrument Name</b>        | Instrument 1 | <b>User Name</b>     |                        |
| <b>Acq Method</b>             | SIBU.m       | <b>Acquired Time</b> | 11/27/2017 10:48:01 AM |
| <b>IRM Calibration Status</b> | Success      | <b>DA Method</b>     | Default.m              |
| <b>Comment</b>                |              |                      |                        |

|                       |                             |              |
|-----------------------|-----------------------------|--------------|
| <b>Sample Group</b>   |                             | <b>Info.</b> |
| <b>Acquisition SW</b> | 6200 series TOF/6500 series |              |
| <b>Version</b>        | Q-TOF B.05.01 (85125.2)     |              |

#### User Spectra

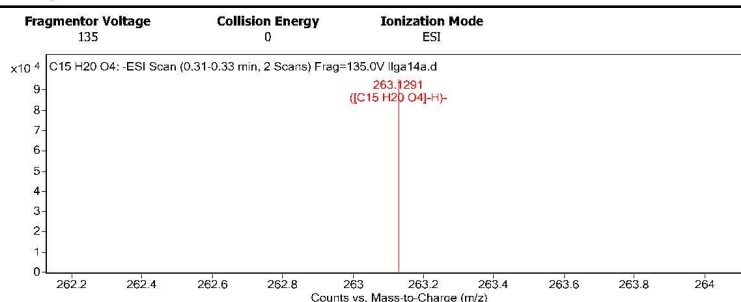

#### Peak List

| m/z       | z | Abund    | Formula    | Ion    |
|-----------|---|----------|------------|--------|
| 119.0364  | 1 | 17871.06 |            |        |
| 263.1291  | 1 | 95318.84 | C15 H20 O4 | (M-H)- |
| 264.1324  | 1 | 15007.87 | C15 H20 O4 | (M-H)- |
| 966.0011  | 1 | 8760.39  |            |        |
| 982.9916  | 1 | 85130.63 |            |        |
| 983.994   | 1 | 14735.99 |            |        |
| 996.012   | 1 | 50640.63 |            |        |
| 997.0147  | 1 | 10217.79 |            |        |
| 1033.9889 | 1 | 71822.22 |            |        |
| 1034.9913 | 1 | 13631.42 |            |        |

#### Formula Calculator Element Limits

| Element | Min | Max |
|---------|-----|-----|
| C       | 3   | 60  |
| H       | 0   | 120 |
| O       | 0   | 30  |

#### Formula Calculator Results

| Formula    | CalculatedMass | CalculatedMz | Mz       | Diff. (mDa) | Diff. (ppm) | DBE    |
|------------|----------------|--------------|----------|-------------|-------------|--------|
| C15 H20 O4 | 264.1362       | 263.1289     | 263.1291 | -0.3        | -0.9        | 6.0000 |

--- End Of Report ---

Figure 29S. <sup>1</sup>H NMR spectrum of 5 (600 MHz, CD<sub>3</sub>OD)

ecg485.21.1.1r — ecg485 H

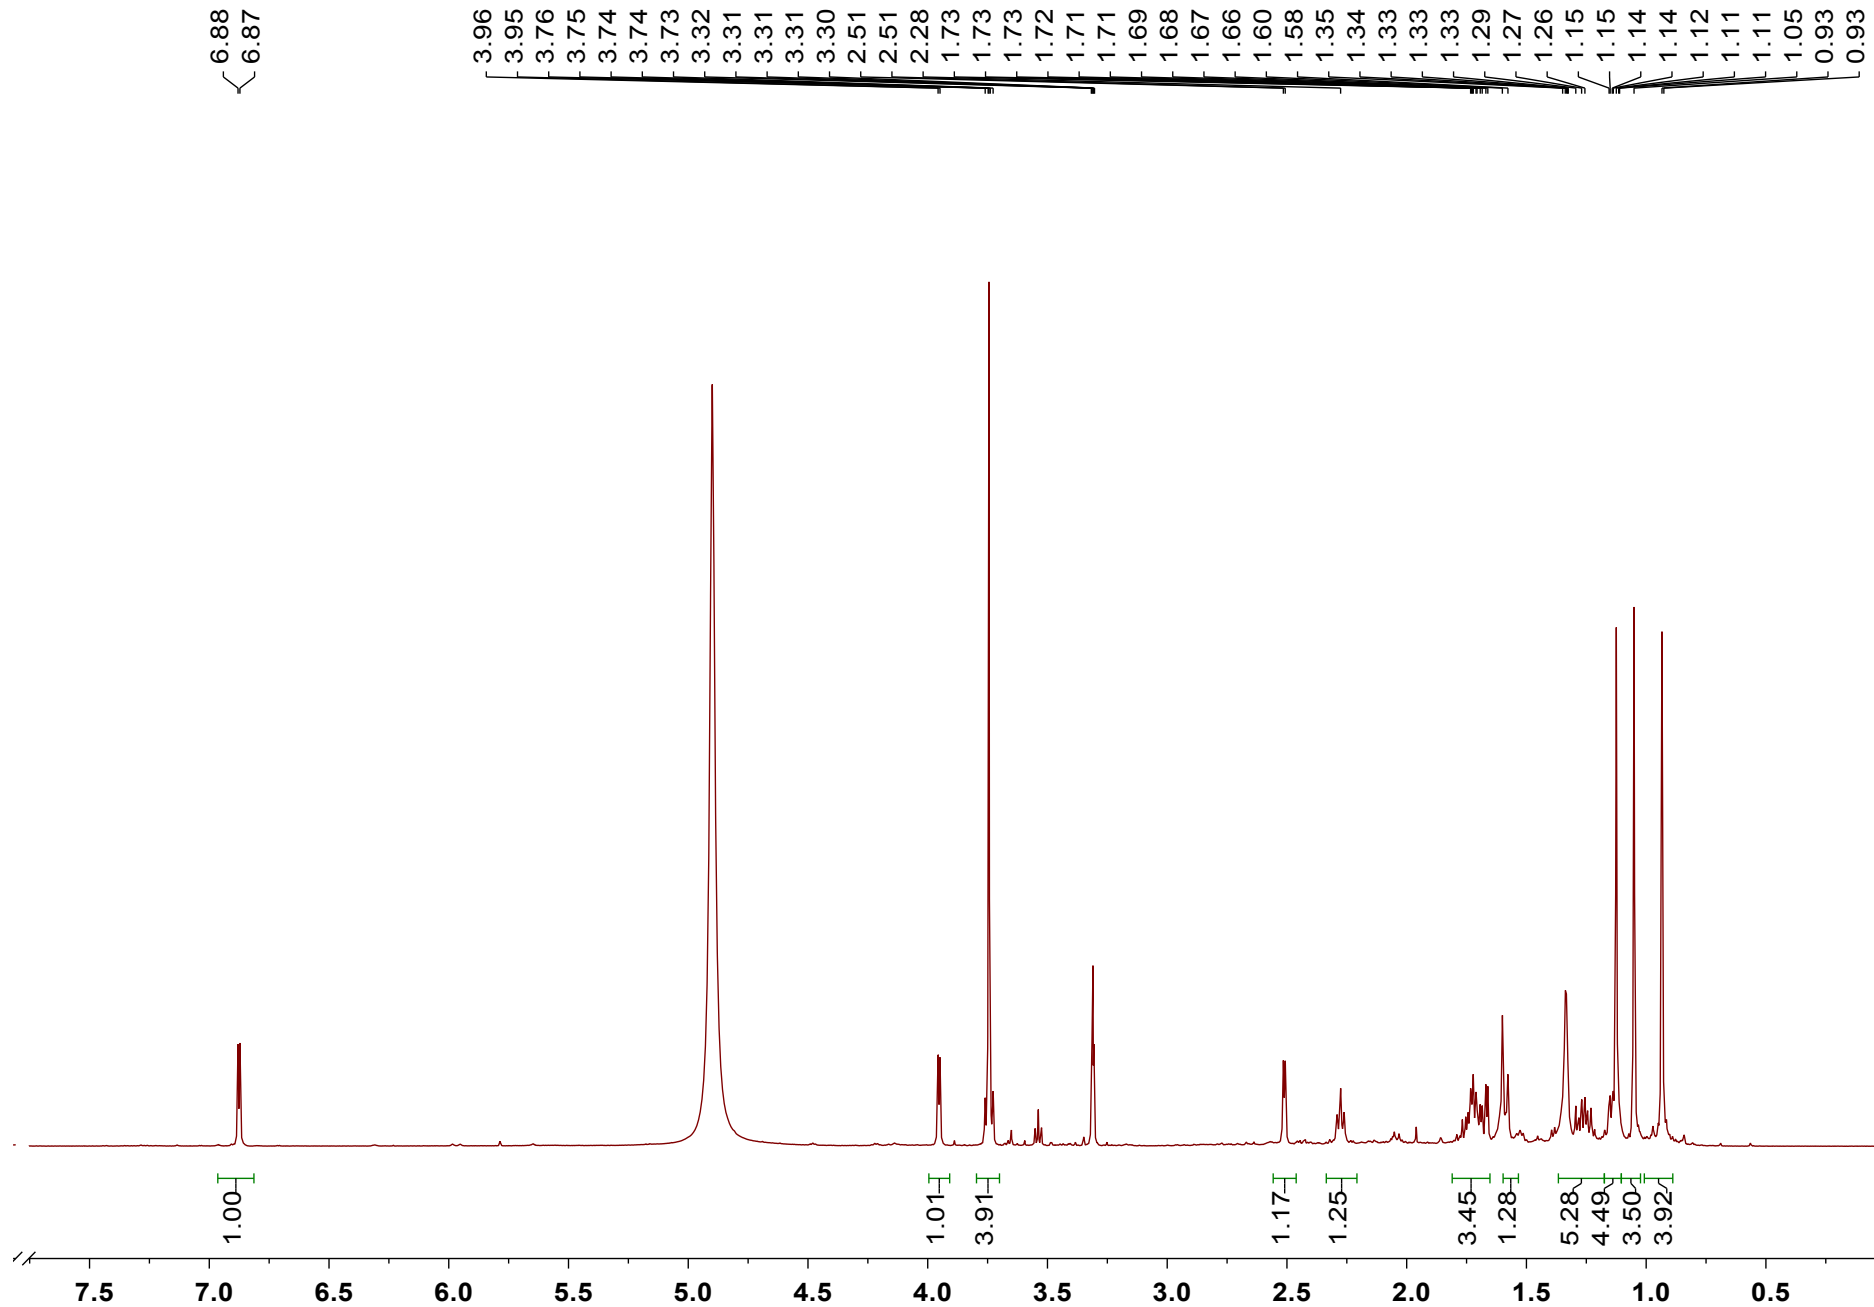

Figure 30S.  $^{13}\text{C}$  NMR and DEPT spectra of **5** (150 MHz,  $\text{CD}_3\text{OD}$ )

t. 24. 1. 1r —

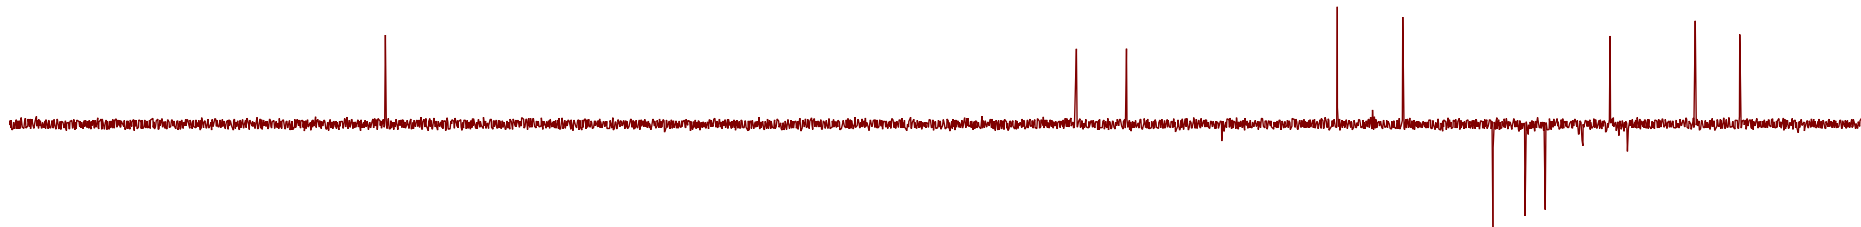

t. 23. 1. 1r —

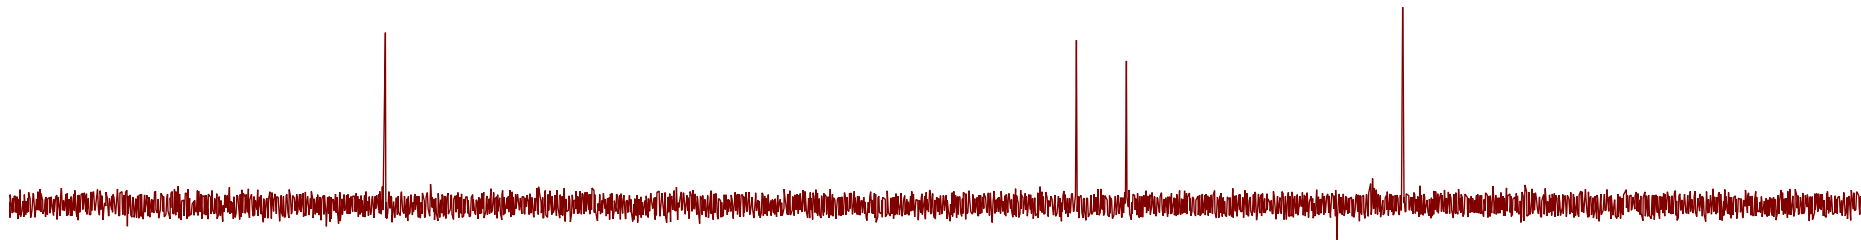

llgc1. 22. 1. 1r — llgc1

c13 and dept

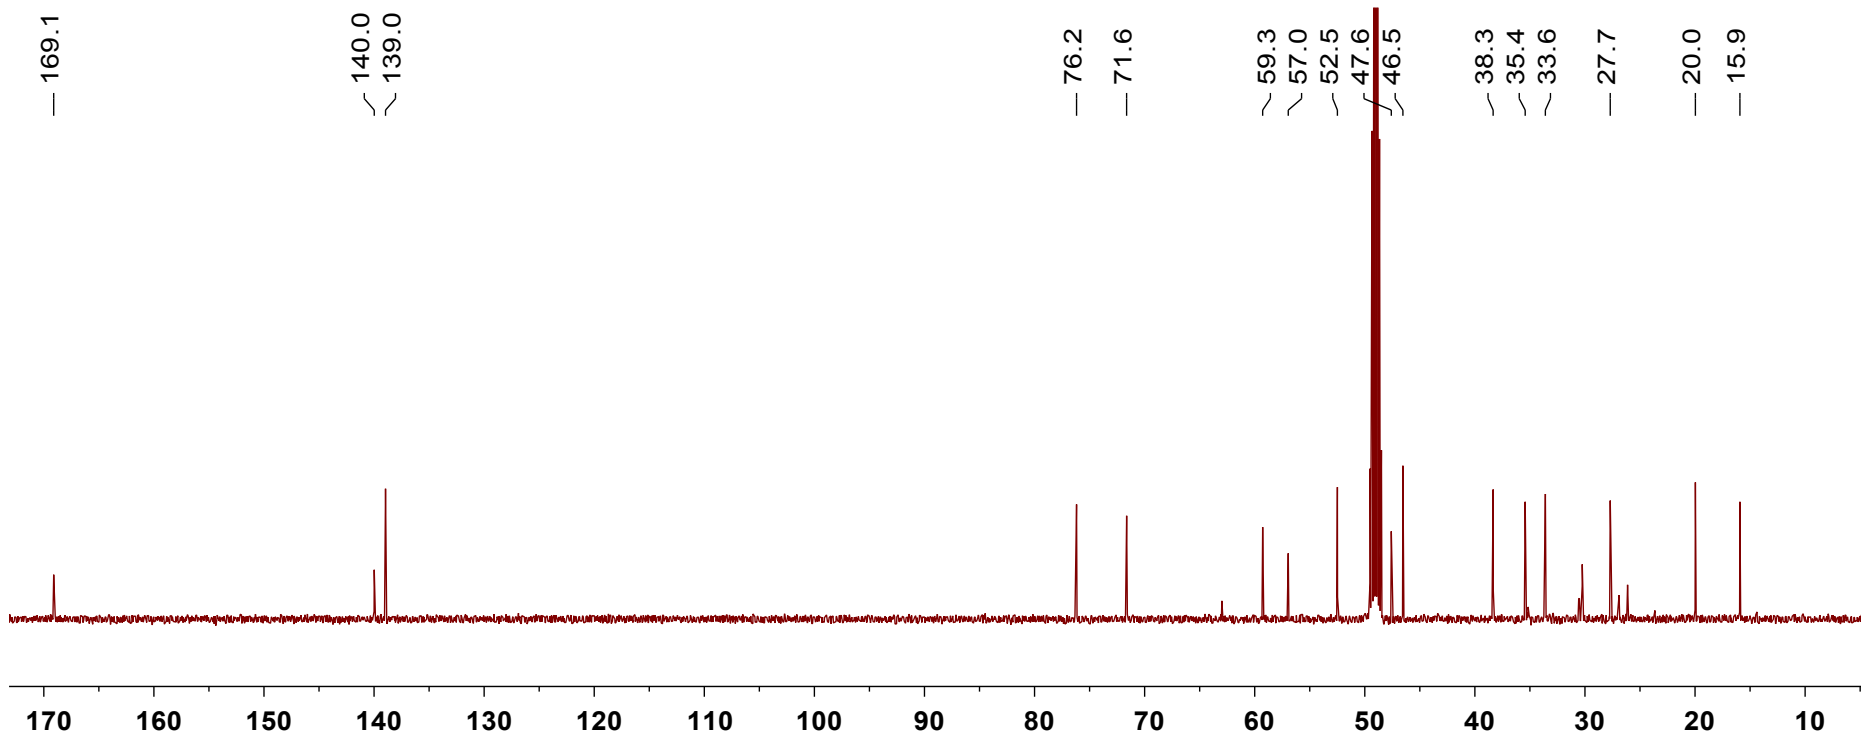

**Figure 31S.** HSQC spectrum of **5** (CD<sub>3</sub>OD)

11gc1.26.1.2rr — 11gc1\_hsqc

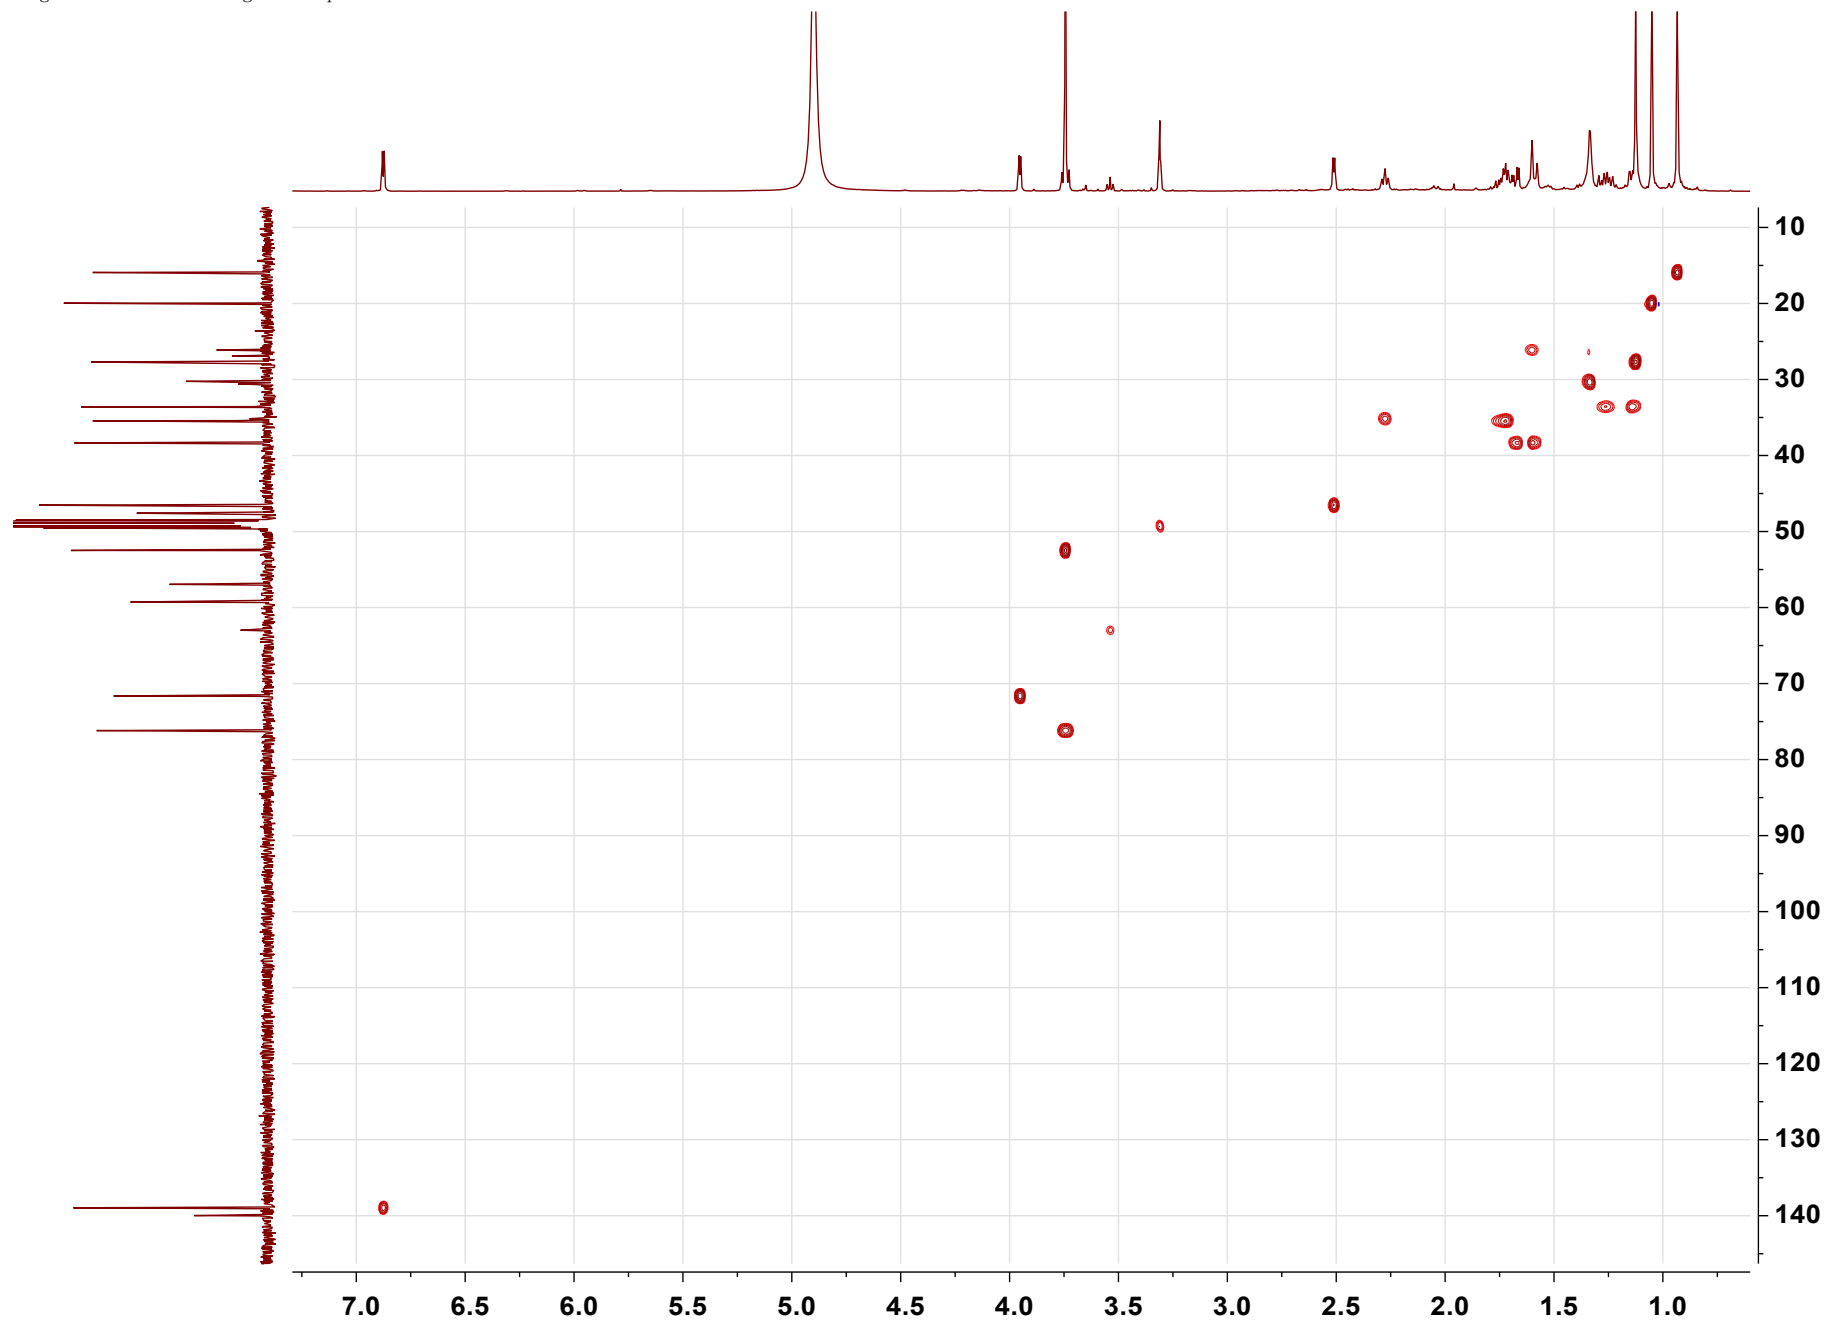

**Figure 32S.**  $^1\text{H}$ - $^1\text{H}$  COSY spectrum of **5** ( $\text{CD}_3\text{OD}$ )

11gc1.25.1.2rr — 11gc1 cosy

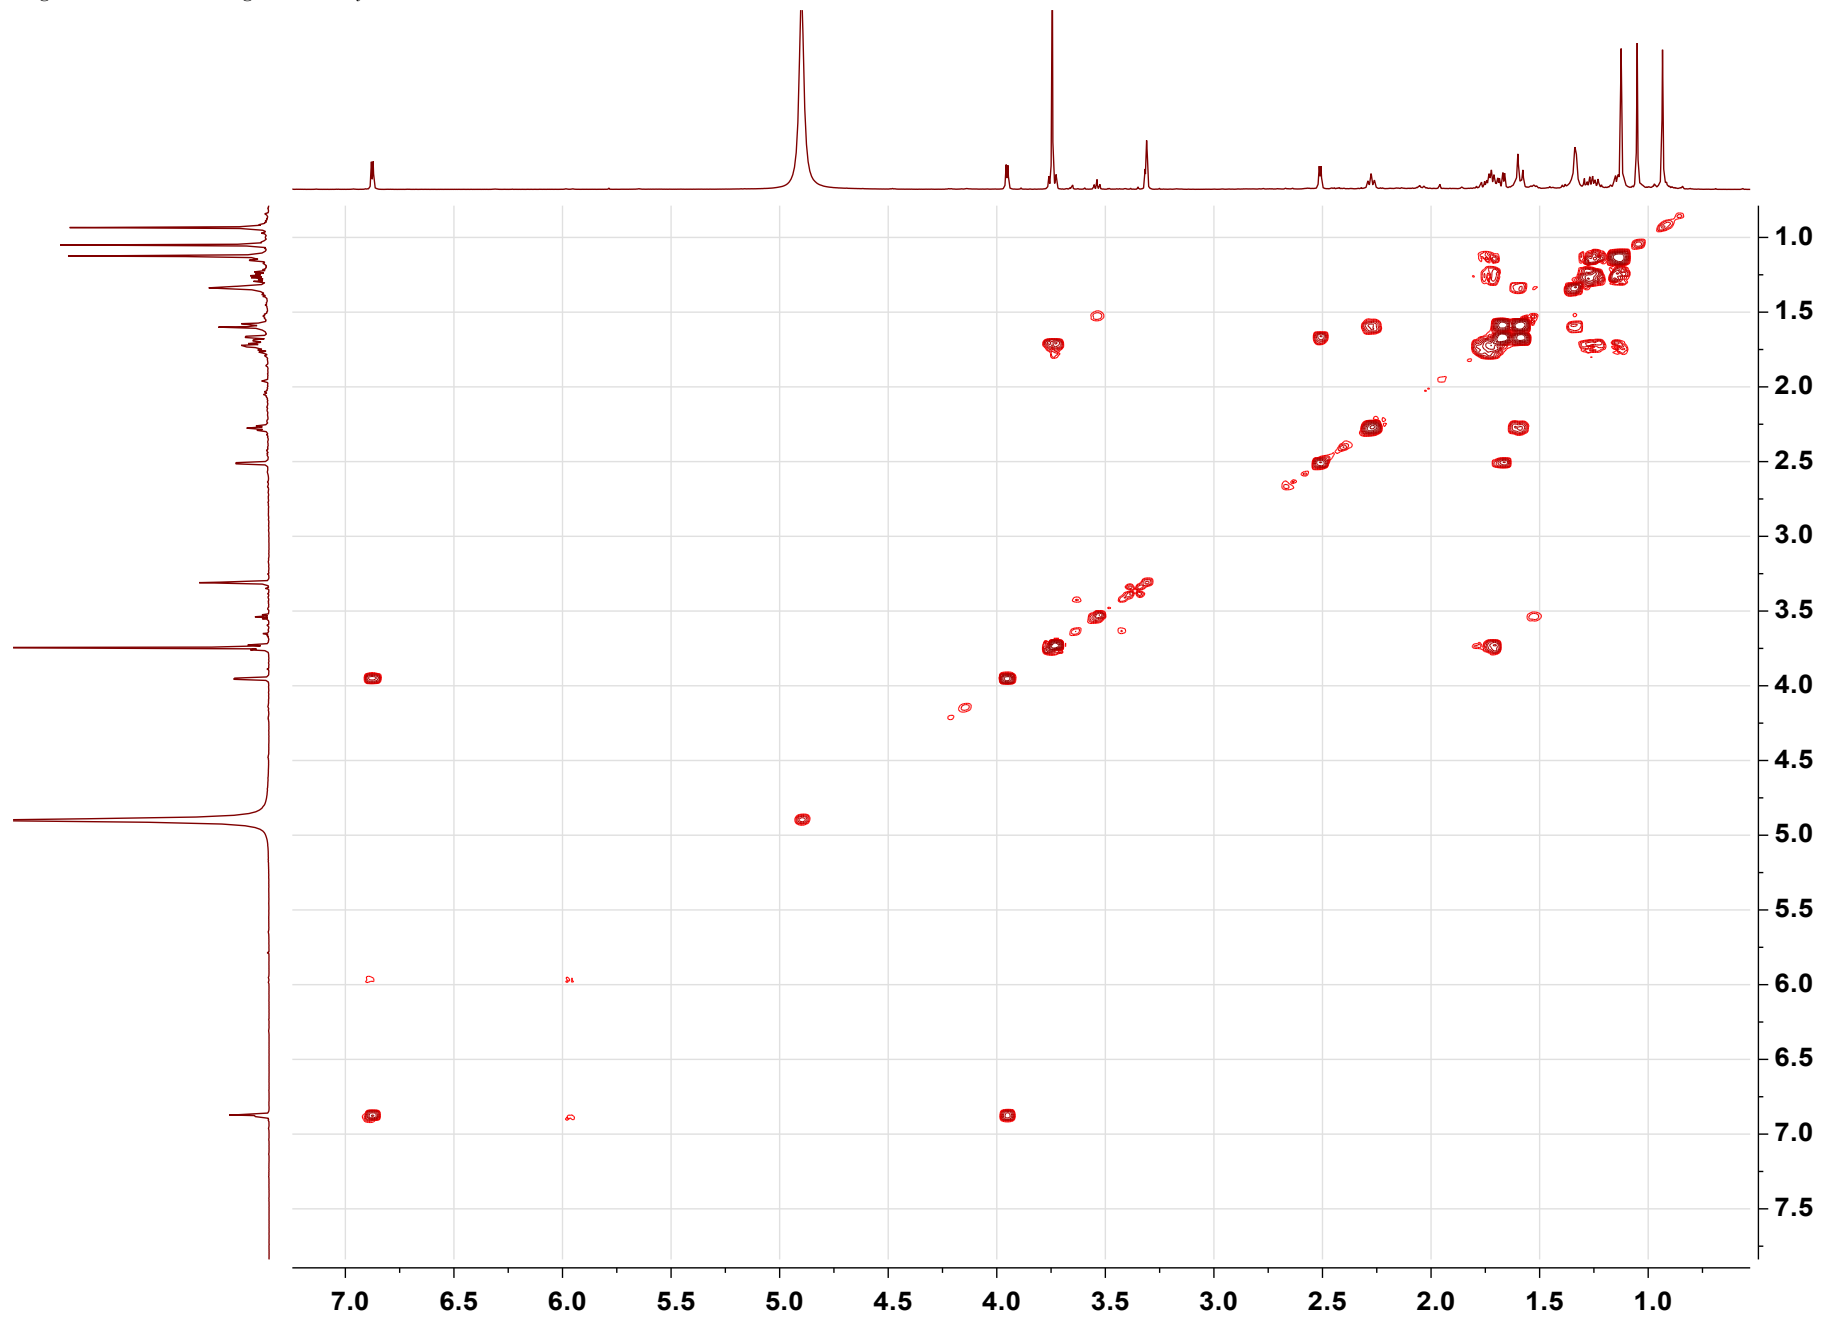

Figure 33S. HMBC spectrum of 5 (CD<sub>3</sub>OD)

11gc1.27.1.2rr — 11gc1 hmbc

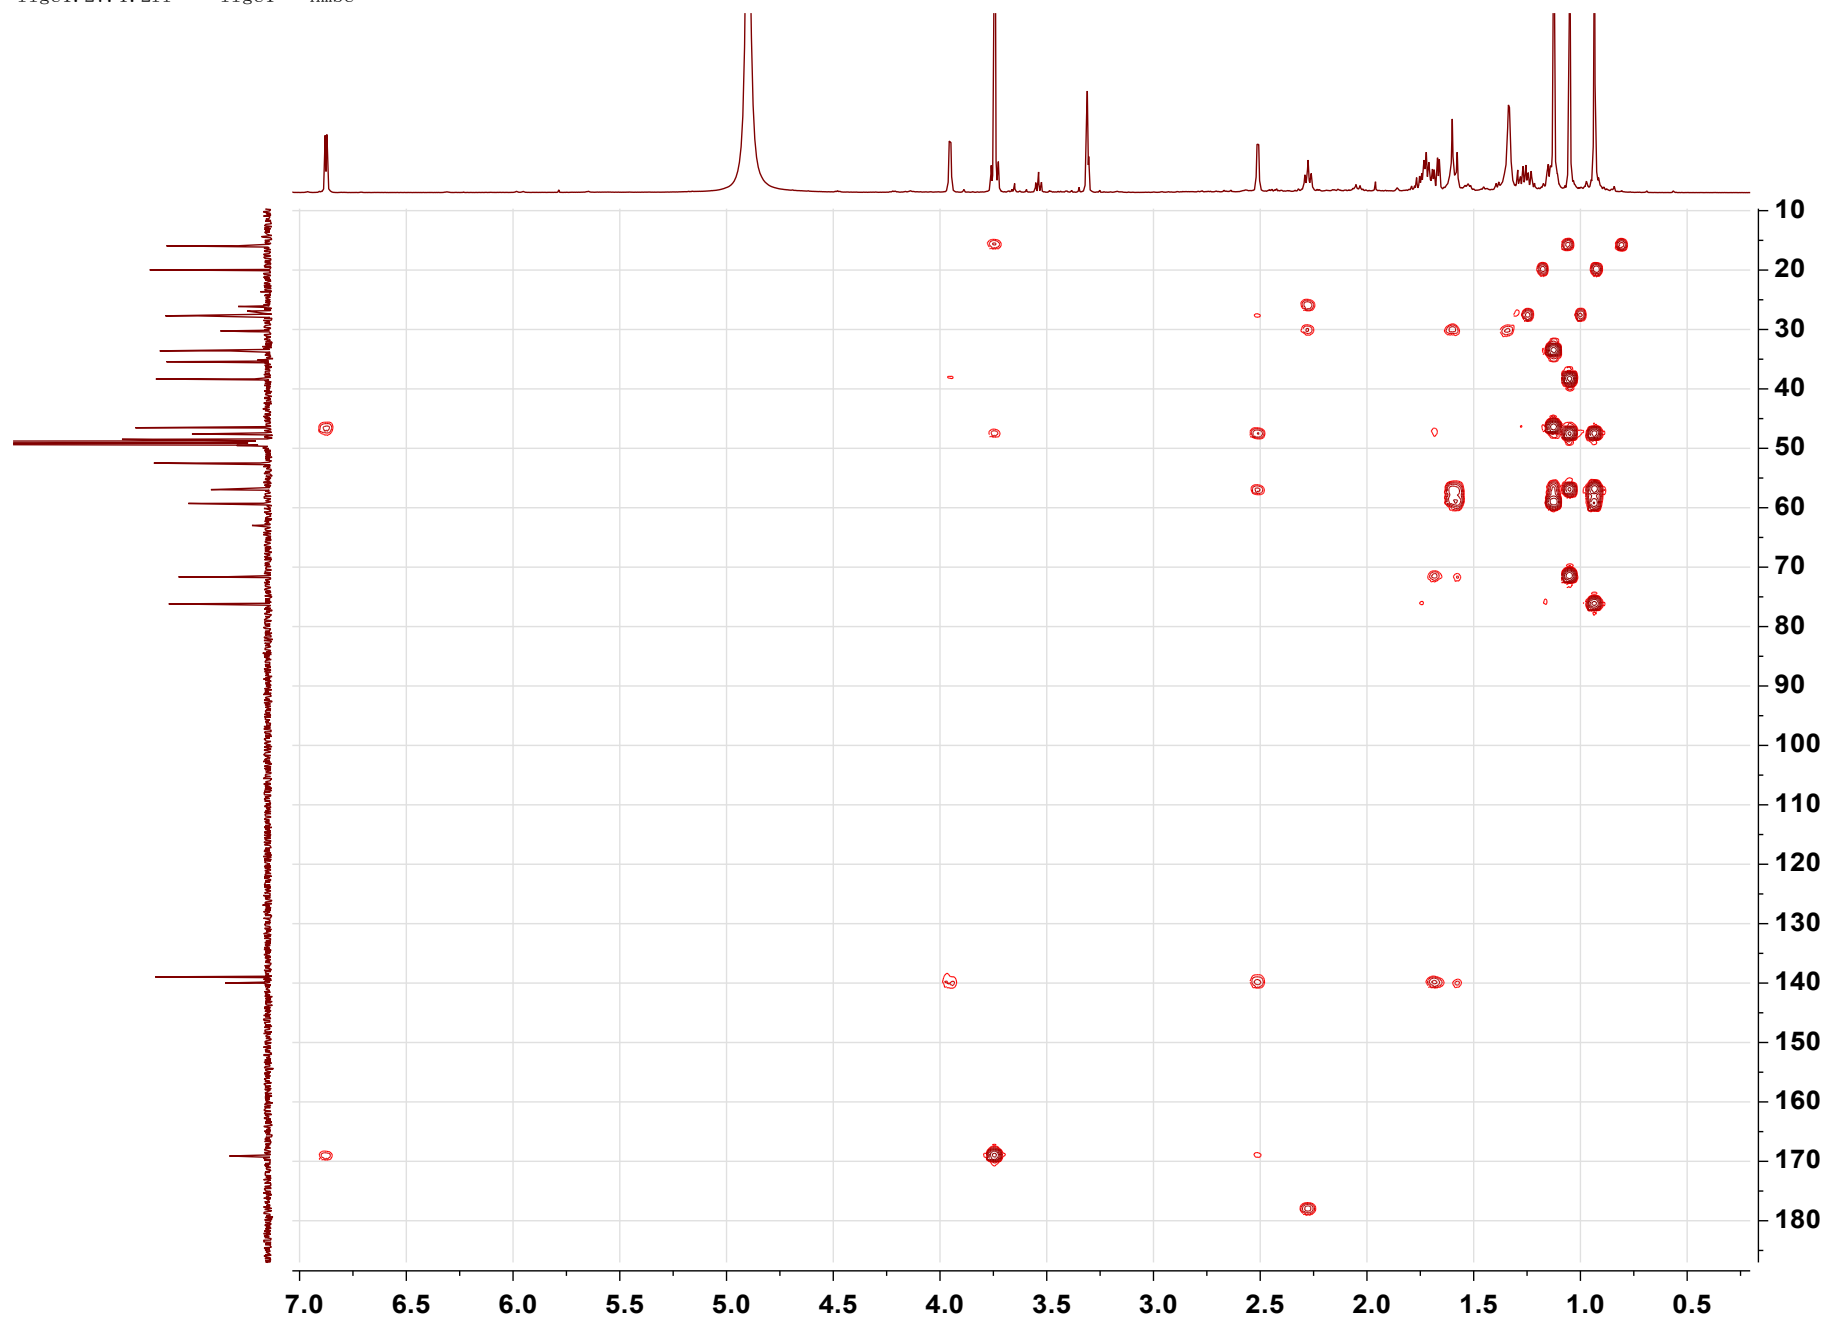

**Figure 34S.** ROESY spectrum of **5** (CD<sub>3</sub>OD)

11gc1.28.1.2rr — 11gc1 roesy

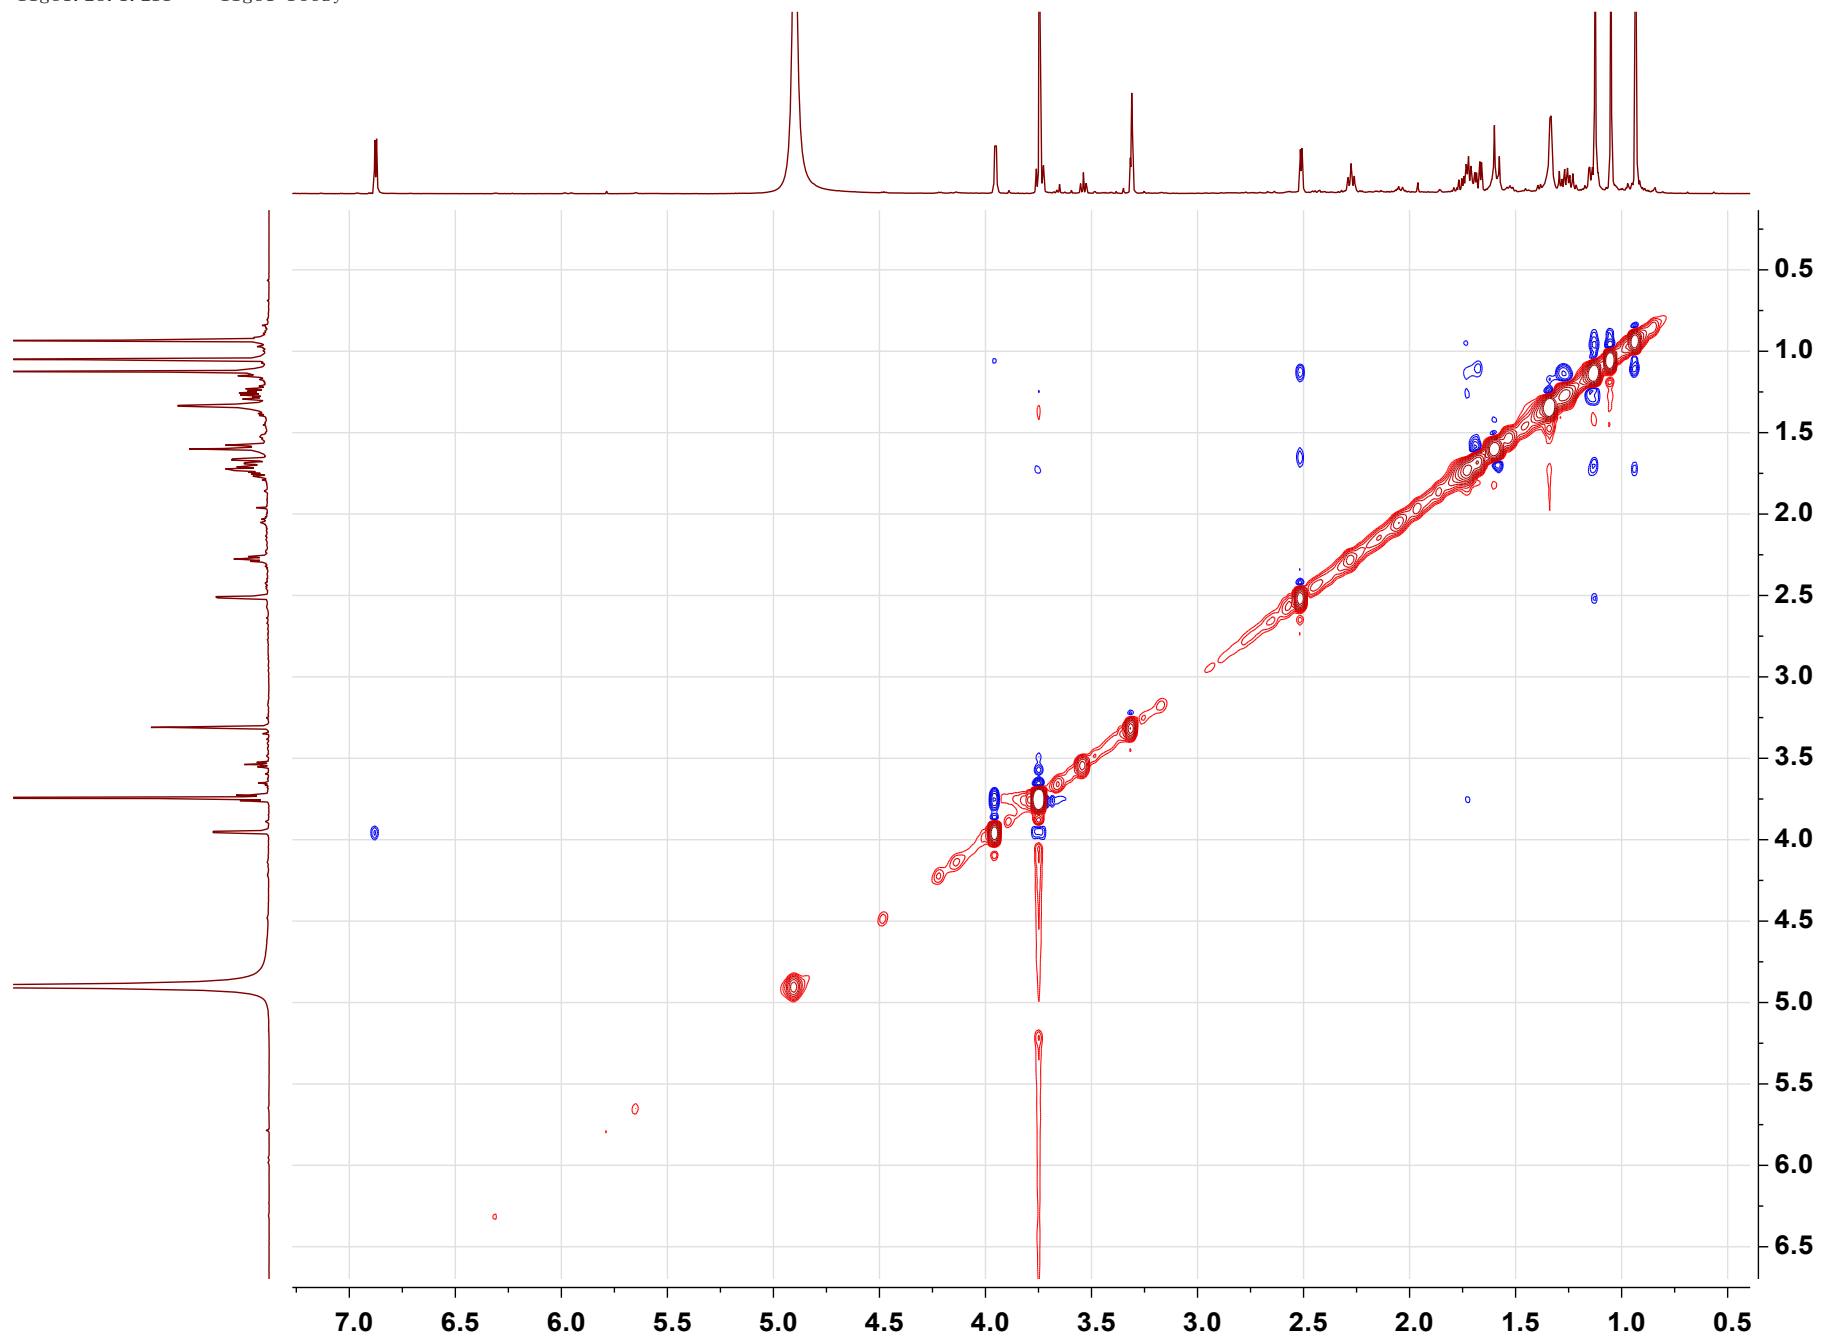

Figure 35S. HRESIMS (+) report of 5

### Qualitative Analysis Report

|                               |              |                      |                        |
|-------------------------------|--------------|----------------------|------------------------|
| <b>Data Filename</b>          | llgc1.d      | <b>Sample Name</b>   | llgc1                  |
| <b>Sample Type</b>            | Sample       | <b>Position</b>      | P2-A3                  |
| <b>Instrument Name</b>        | Instrument 1 | <b>User Name</b>     |                        |
| <b>Acq Method</b>             | SIBU.m       | <b>Acquired Time</b> | 11/27/2017 10:16:11 AM |
| <b>IRM Calibration Status</b> | Success      | <b>DA Method</b>     | Default.m              |
| <b>Comment</b>                |              |                      |                        |

|                       |                             |              |
|-----------------------|-----------------------------|--------------|
| <b>Sample Group</b>   |                             | <b>Info.</b> |
| <b>Acquisition SW</b> | 6200 series TOF/6500 series |              |
| <b>Version</b>        | Q-TOF B.05.01 (B5125.2)     |              |

#### User Spectra

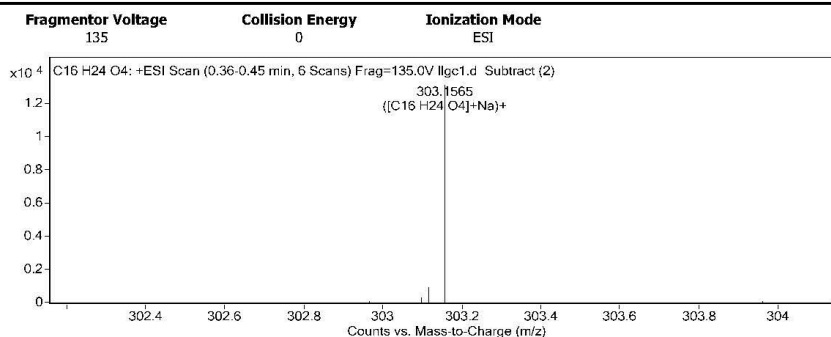

#### Peak List

| <i>m/z</i> | <i>z</i> | Abund    | Formula    | Ion     |
|------------|----------|----------|------------|---------|
| 273.146    | 1        | 16040.5  |            |         |
| 275.1618   | 1        | 11812.88 |            |         |
| 289.1199   | 1        | 5606.91  |            |         |
| 289.1395   | 1        | 4961.16  |            |         |
| 303.1565   | 1        | 13069.8  | C16 H24 O4 | (M+Na)+ |
| 319.1309   | 1        | 9919.51  |            |         |
| 331.1505   | 1        | 12196.29 |            |         |
| 333.1672   | 1        | 7356.92  |            |         |
| 347.1255   | 1        | 4758.05  |            |         |
| 401.1549   | 1        | 6929.66  |            |         |

#### Formula Calculator Element Limits

| Element | Min | Max |
|---------|-----|-----|
| C       | 3   | 60  |
| H       | 0   | 120 |
| O       | 0   | 30  |

#### Formula Calculator Results

| Formula    | CalculatedMass | CalculatedMz | Mz       | Diff. (mDa) | Diff. (ppm) | DBE    |
|------------|----------------|--------------|----------|-------------|-------------|--------|
| C16 H24 O4 | 280.1675       | 303.1567     | 303.1565 | 0.0         | 0.1         | 5.0000 |

--- End Of Report ---



**Figure 36S.**  $^1\text{H}$  NMR spectrum of **6** and **7** (600 MHz,  $\text{CDCl}_3$ )

11gf4b.21.1.1r — 11gf4b\_hsqc

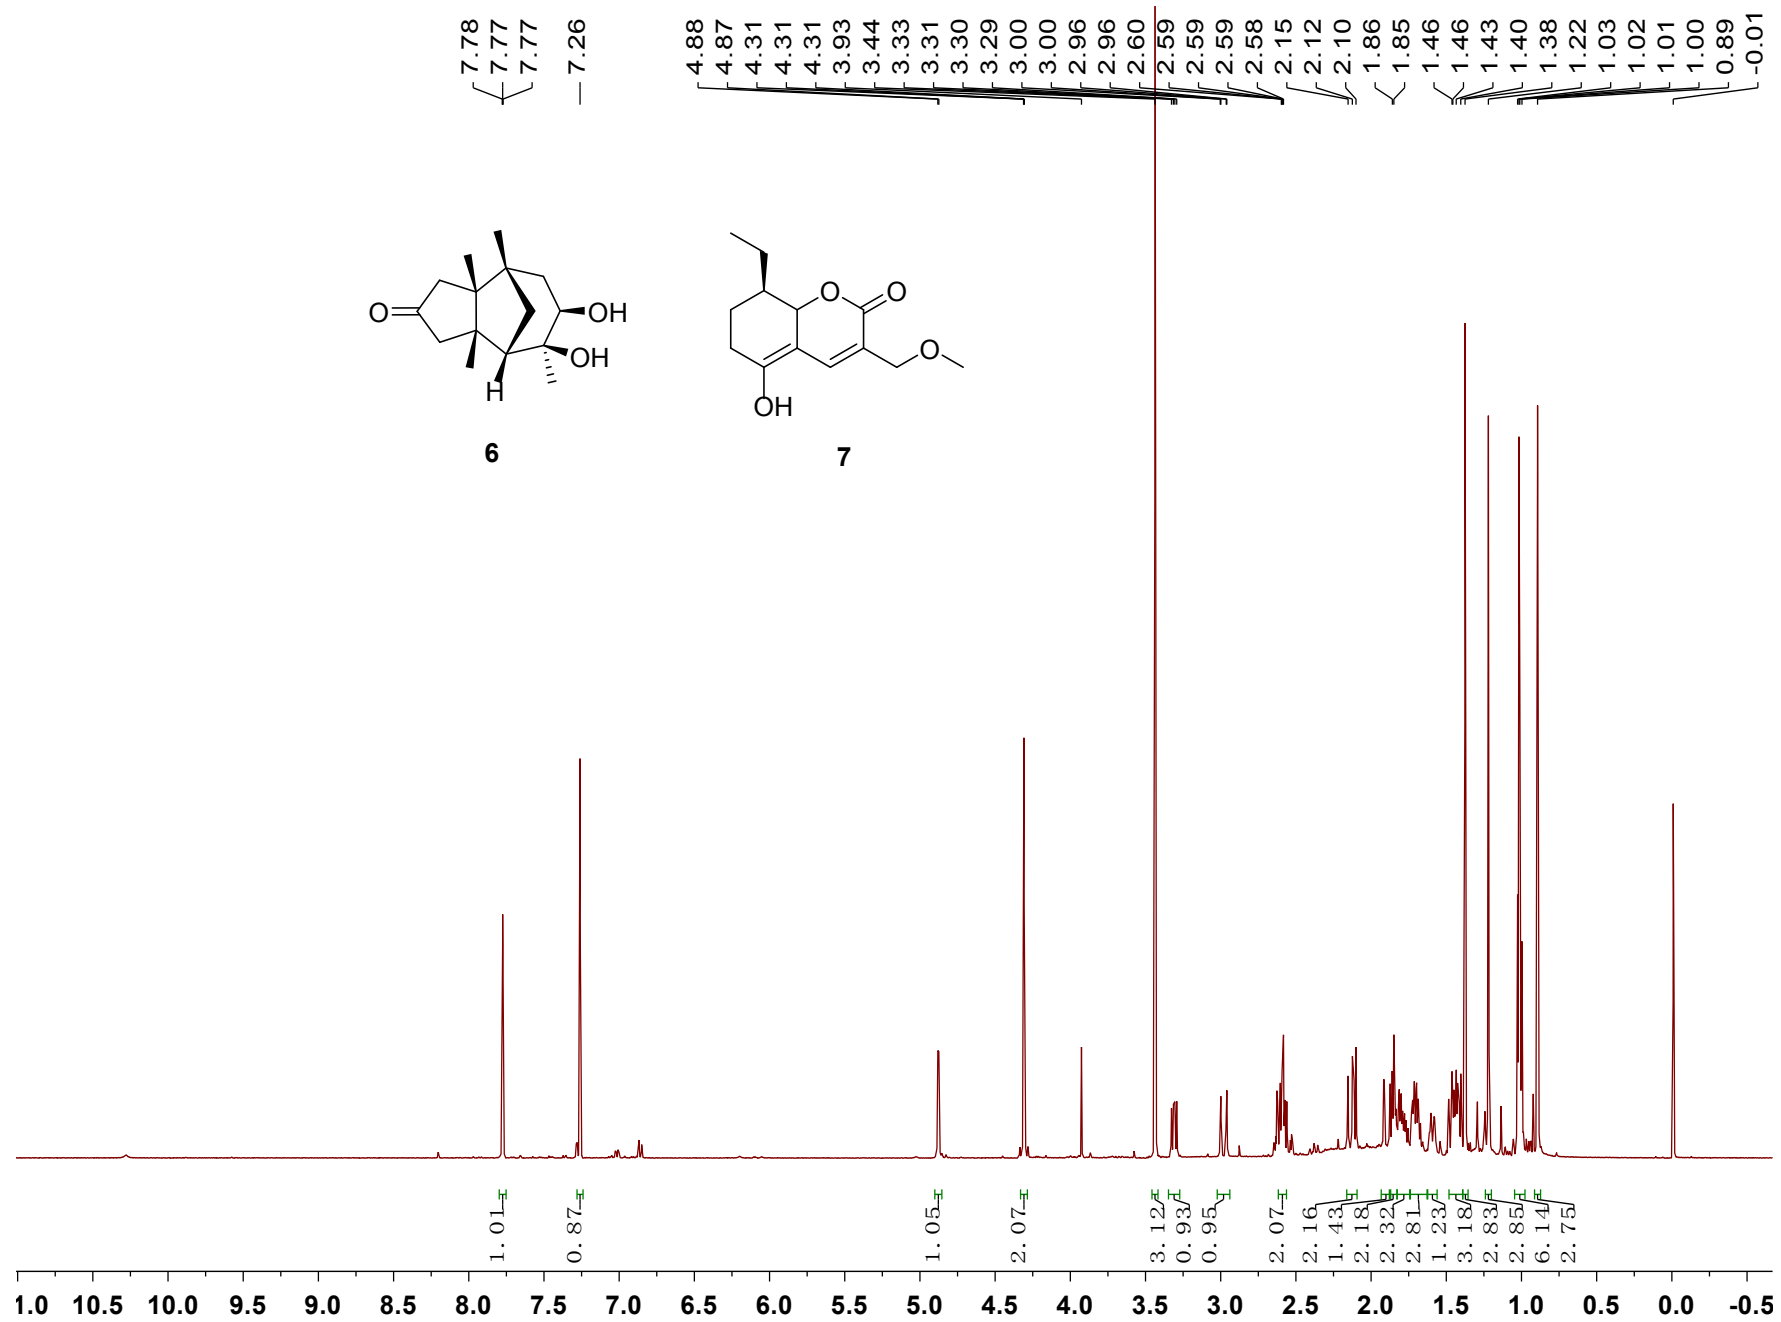

Figure 37S.  $^{13}\text{C}$  NMR and DEPT spectra of **6** and **7** (150 MHz,  $\text{CDCl}_3$ )

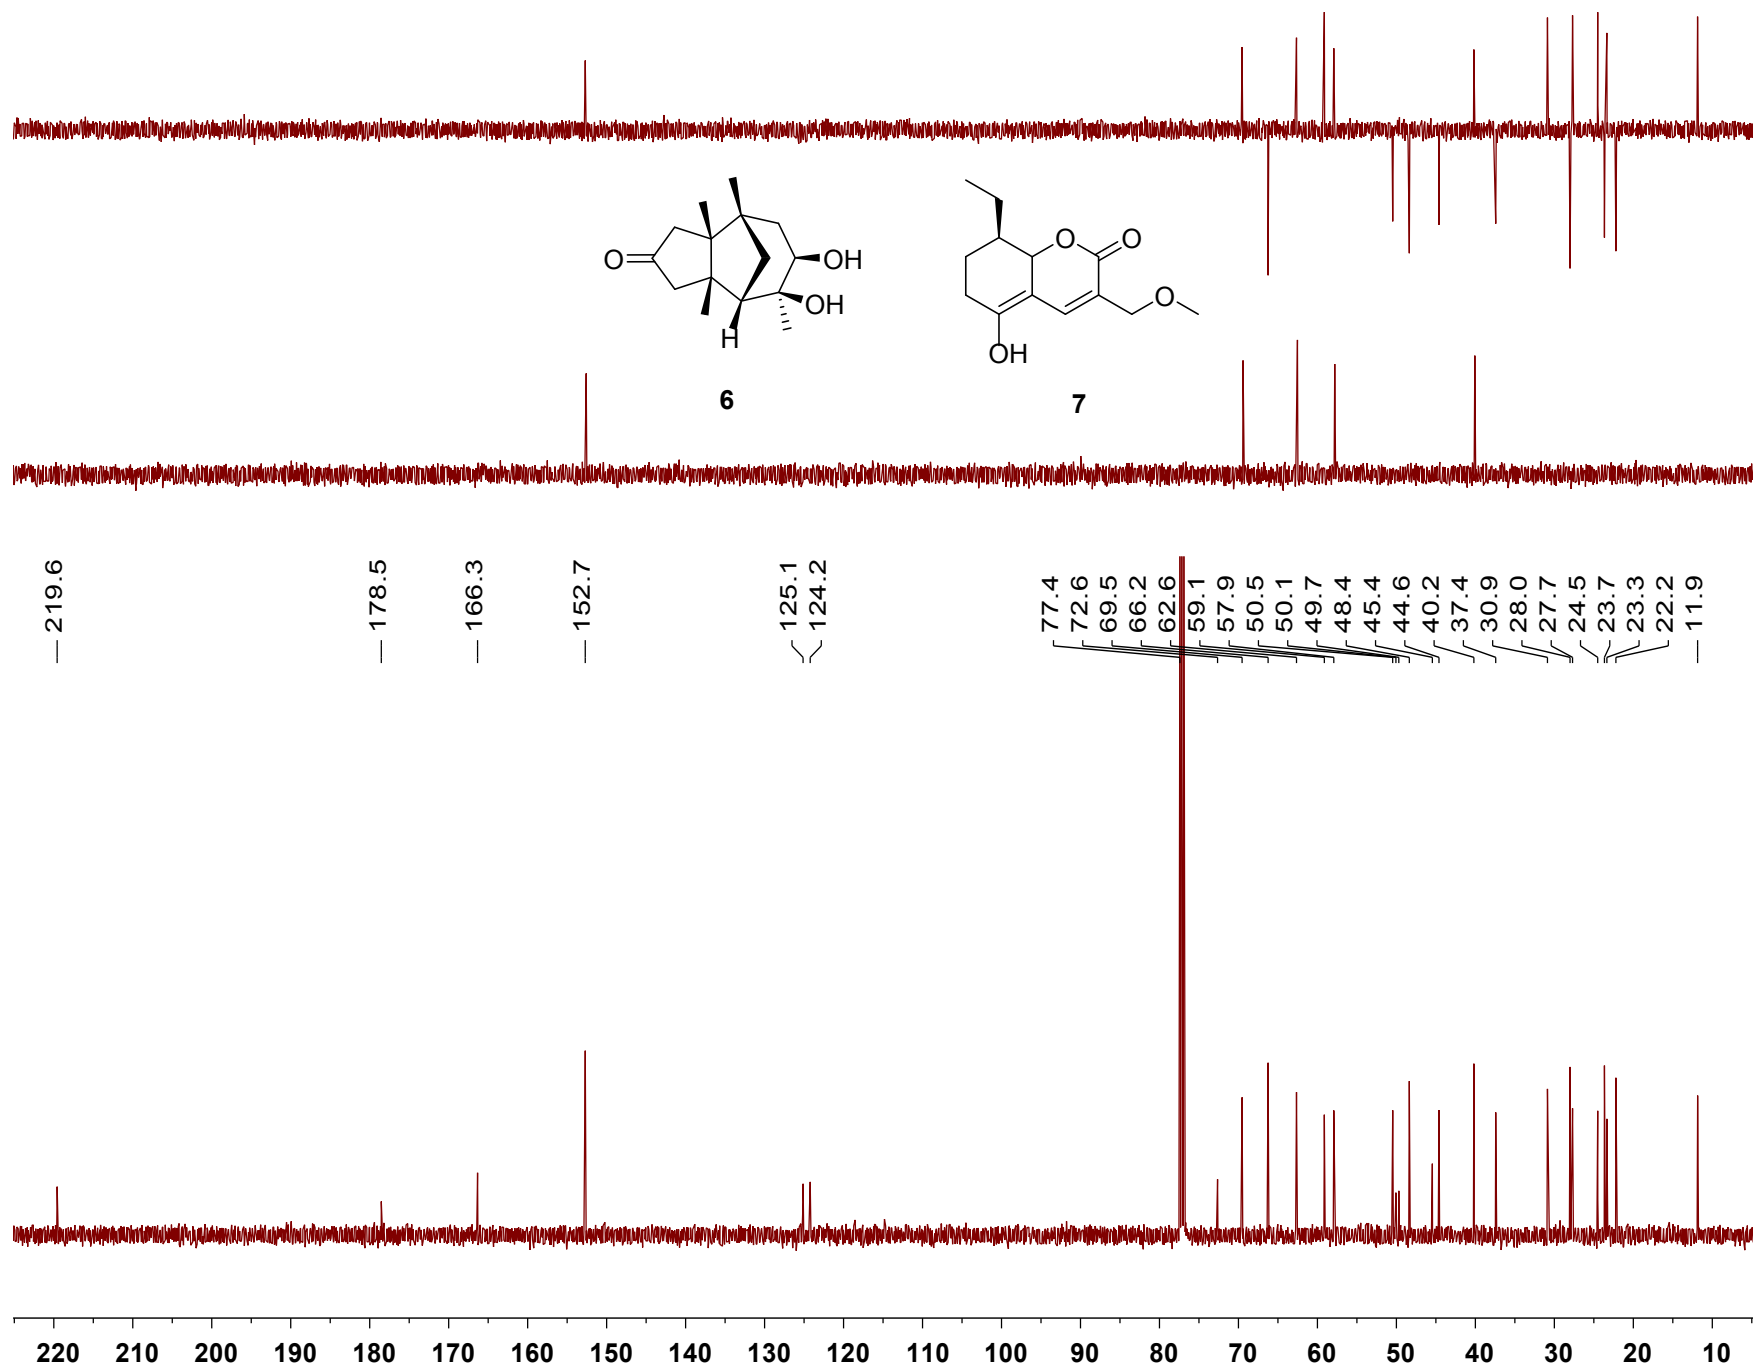

Figure 38S. HSQC spectrum of **6** and **7** (CDCl<sub>3</sub>)

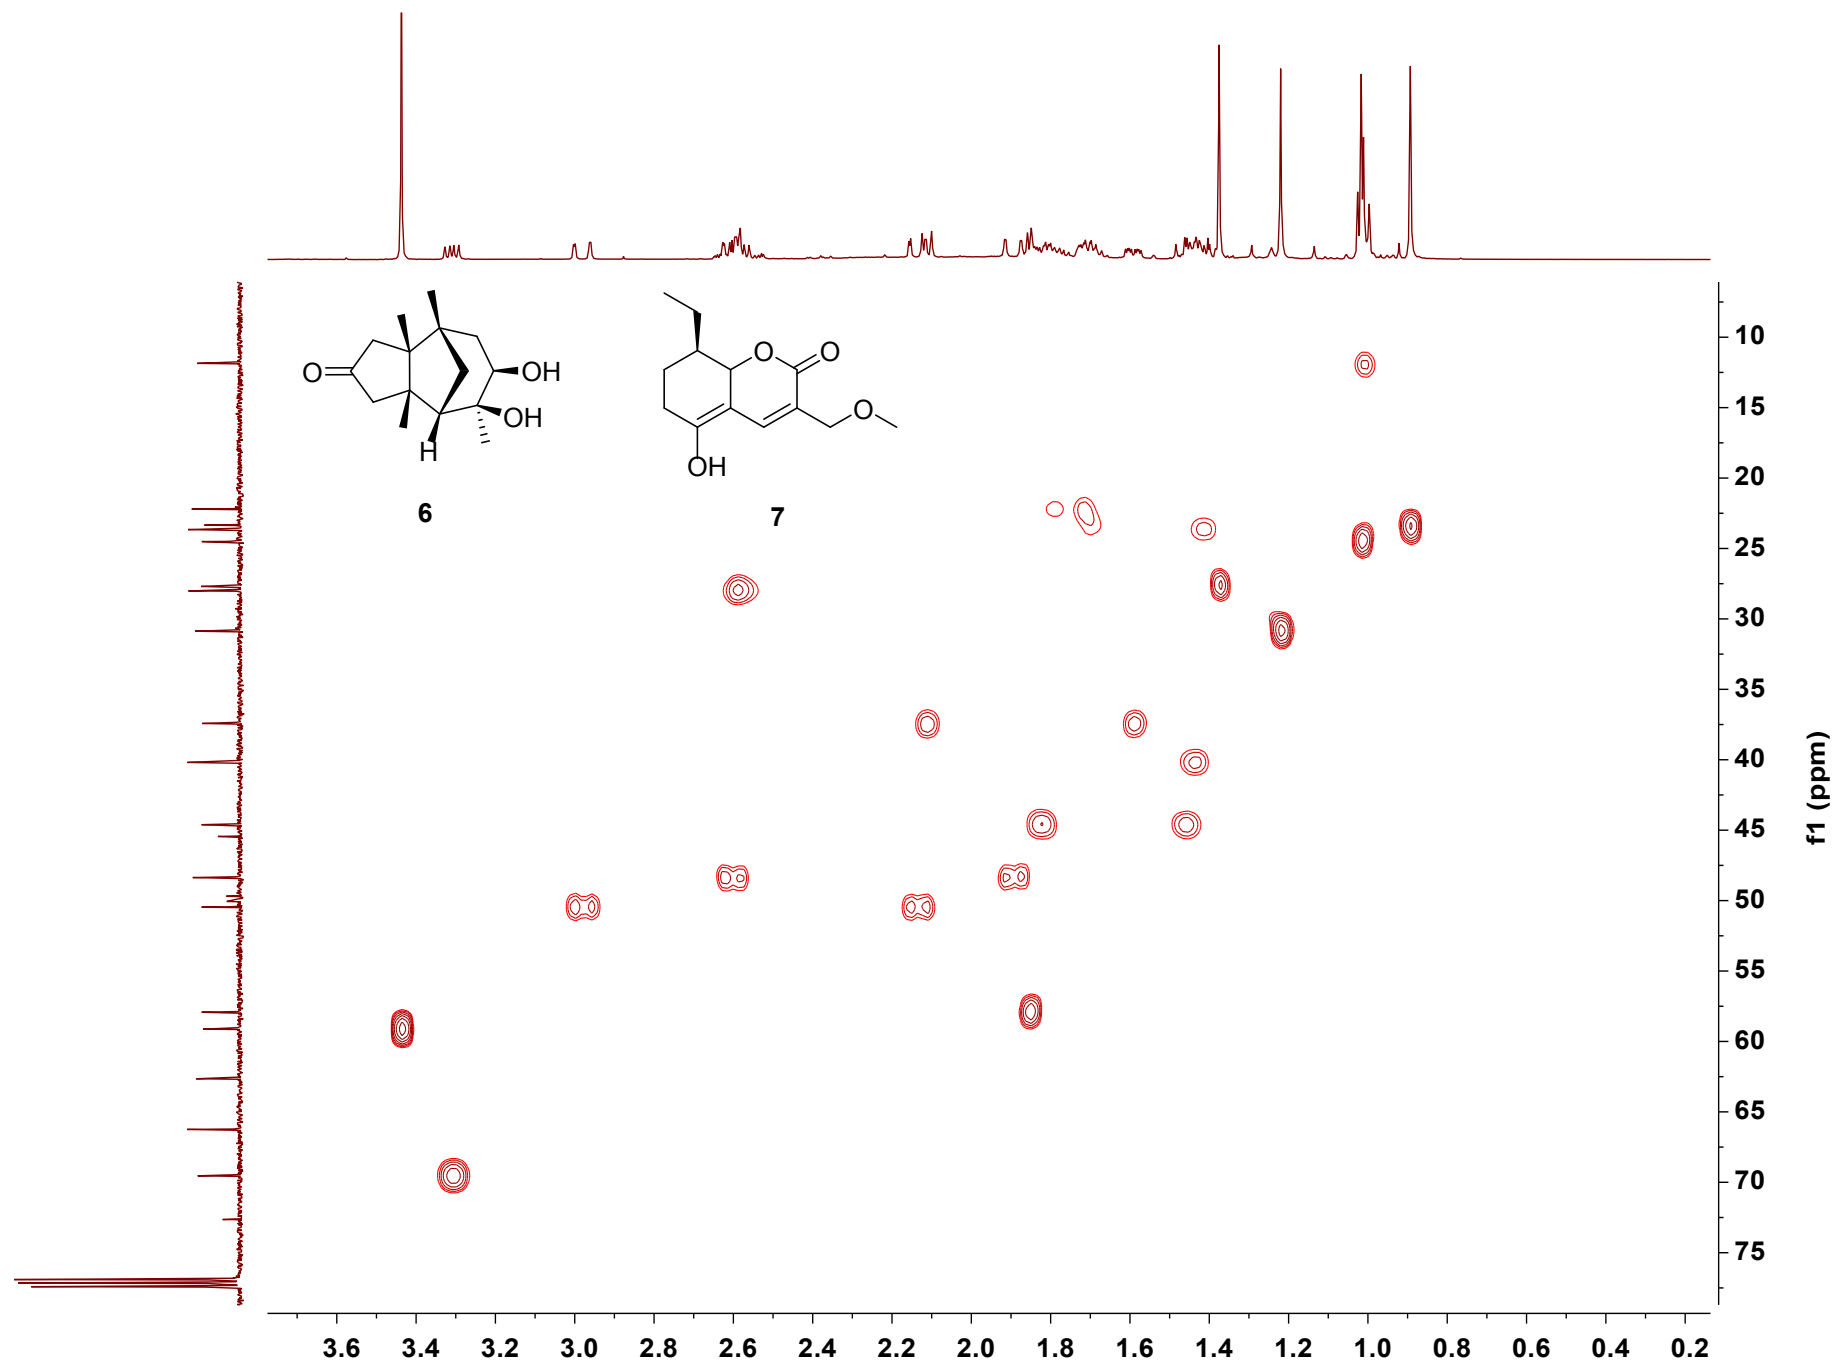

Figure 39S.  $^1\text{H}$ - $^1\text{H}$  COSY spectrum of **6** and **7** ( $\text{CDCl}_3$ )

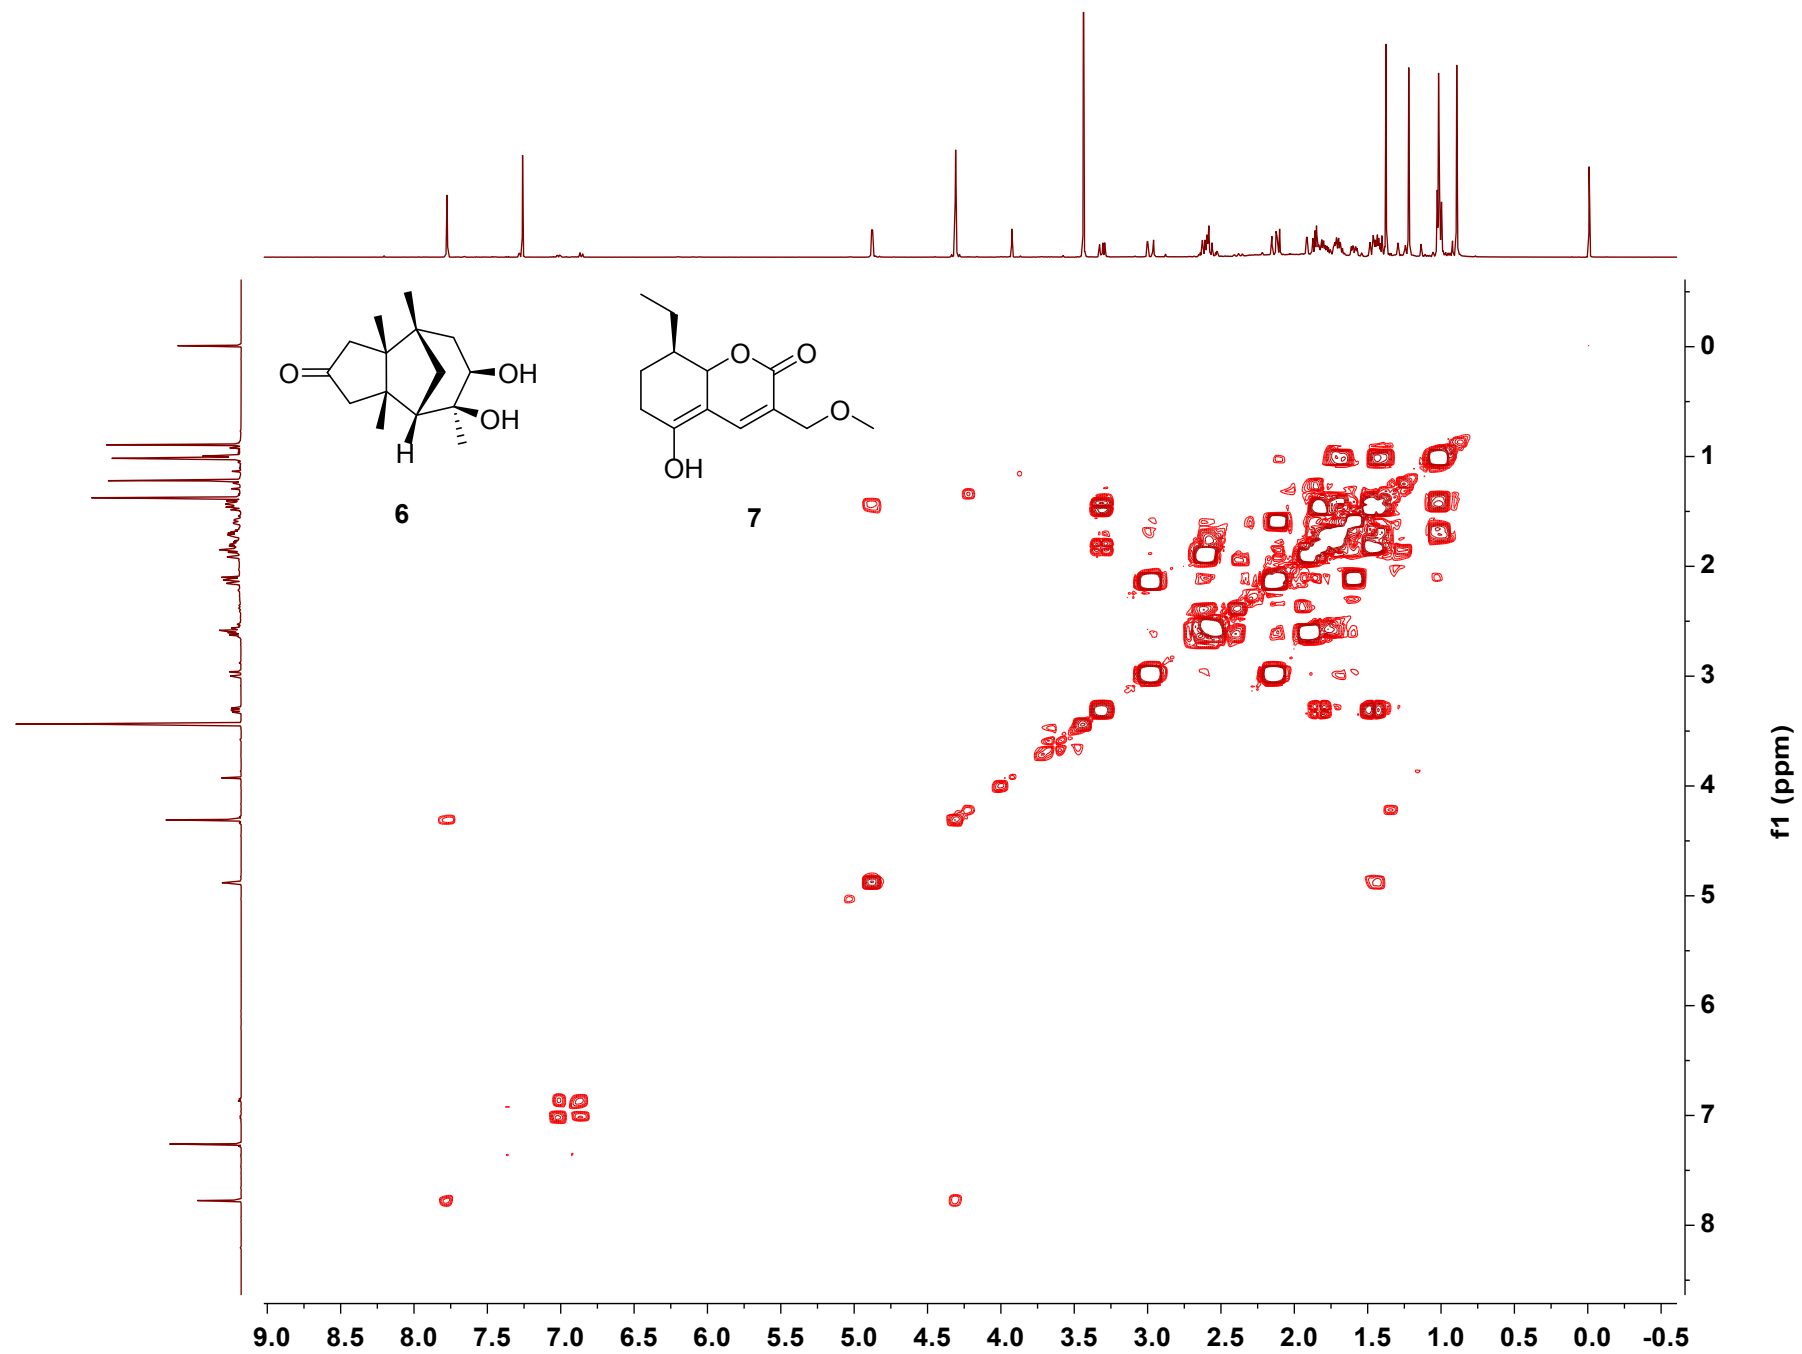

Figure 40S. HMBC spectrum of **6** and **7** (CDCl<sub>3</sub>)

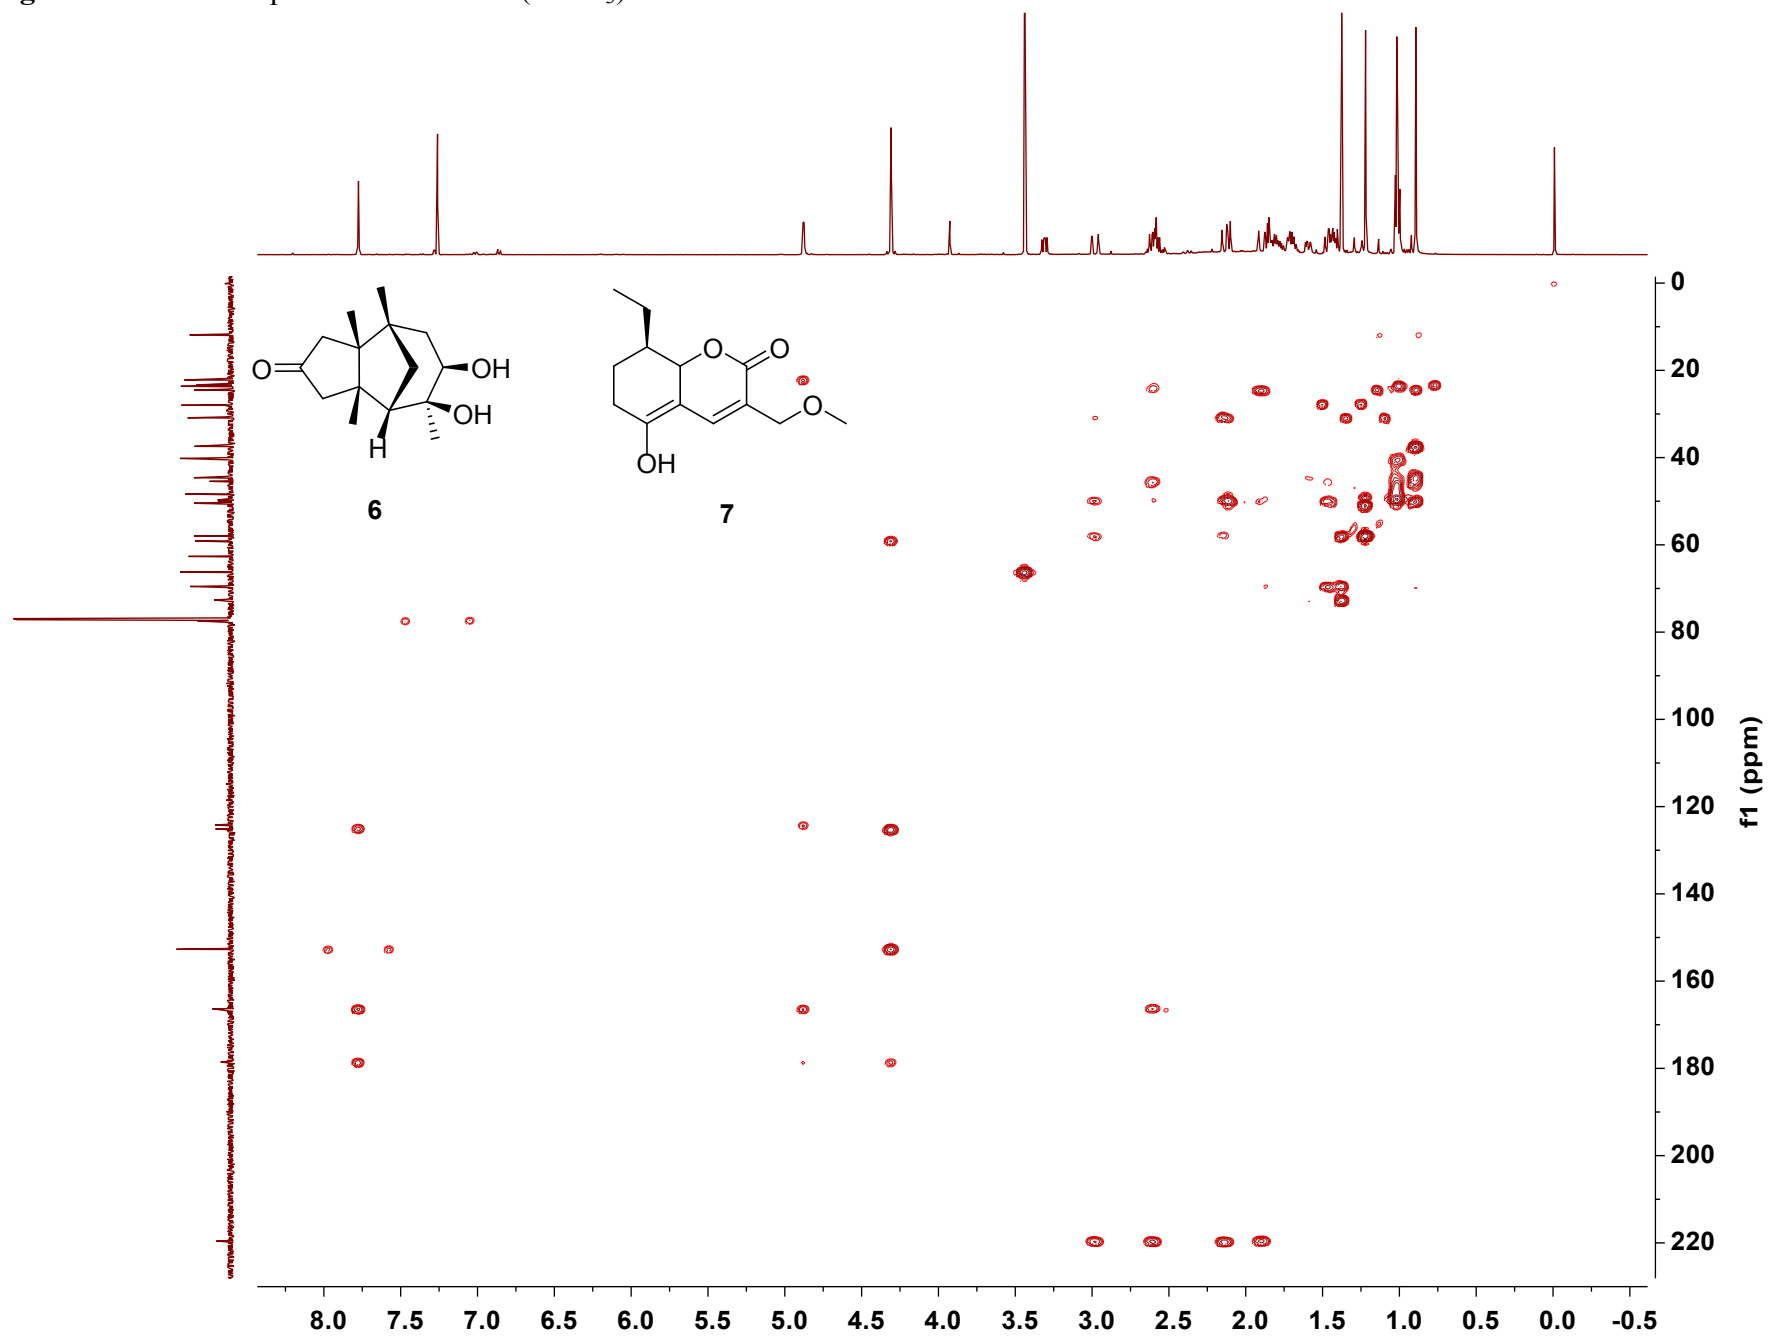

Figure 41S. ROESY spectrum of **6** and **7** (CDCl<sub>3</sub>)

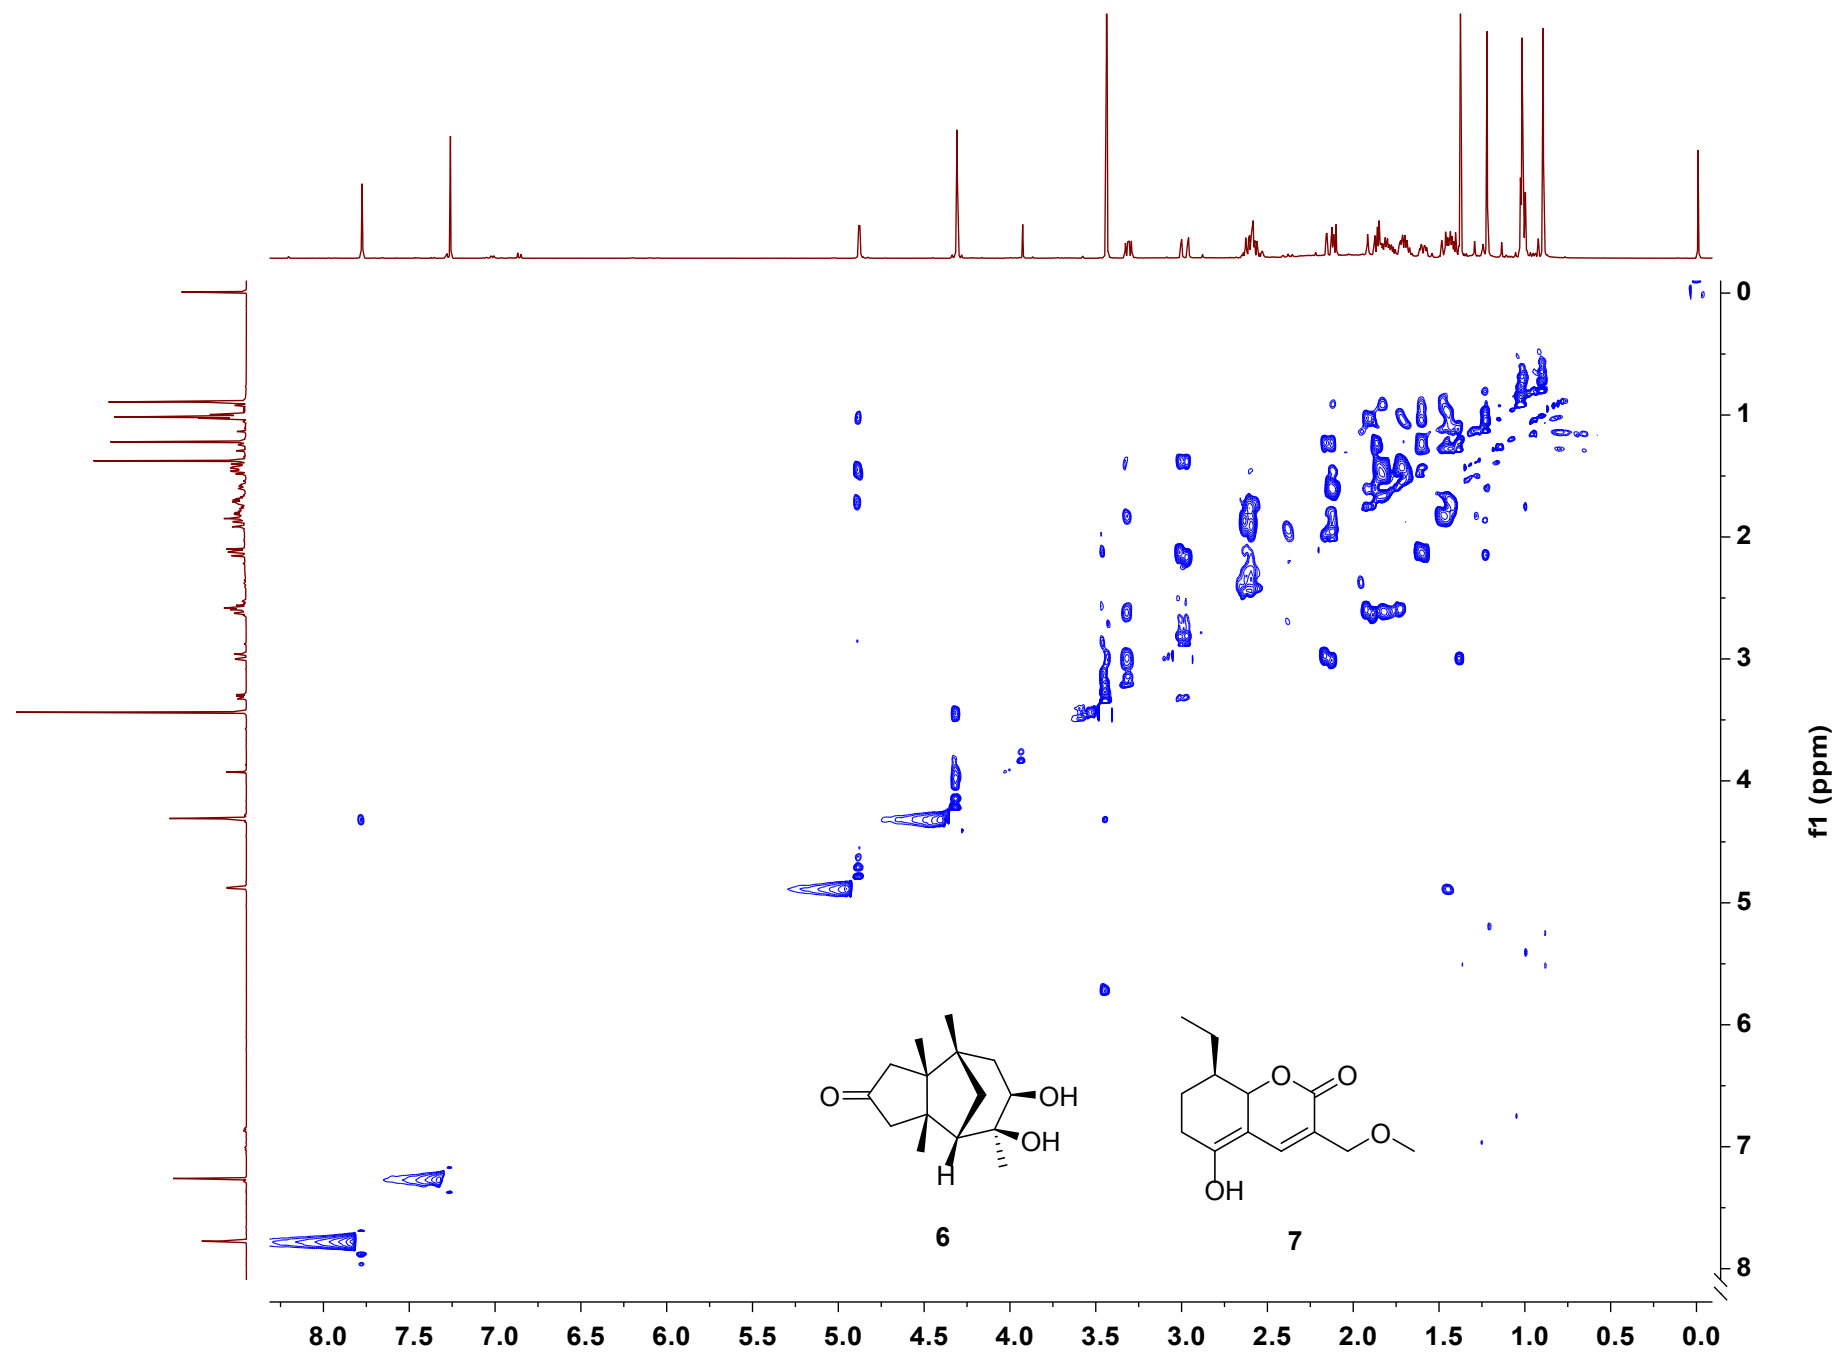

# Figure 42S. HREIMS (+) report of 6

## Elemental Composition Report

### Single Mass Analysis

Tolerance = 10.0 PPM / DBE: min = -10.0, max = 120.0

Selected filters: None

Monoisotopic Mass, Odd and Even Electron Ions

19 formula(e) evaluated with 1 results within limits (up to 51 closest results for each mass)

Elements Used:

C: 0-200 H: 0-400 O: 1-4

Ilqf4b

15:48:58 23-Mar-2017

Voltage EI+

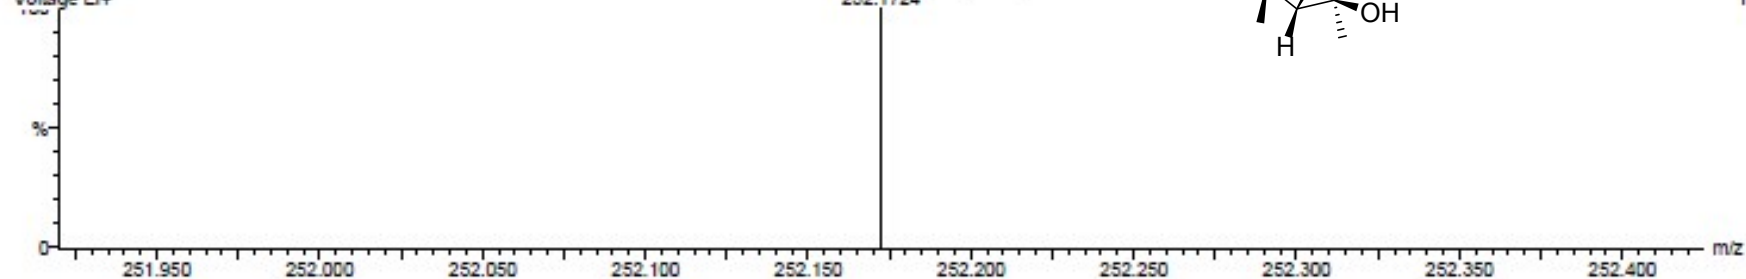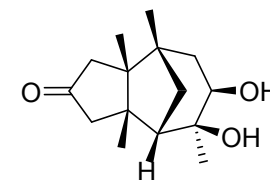

Autospec Premier  
P776  
1

Minimum: 200.0 10.0 -10.0  
Maximum: 200.0 10.0 120.0

| Mass     | Calc. Mass | mDa  | PPM  | DBE | i-FIT     | Formula    |
|----------|------------|------|------|-----|-----------|------------|
| 252.1724 | 252.1725   | -0.1 | -0.4 | 4.0 | 5546026.0 | C15 H24 O3 |

Figure 43S. HRESIMS (+) report of 7

### Qualitative Analysis Report

|                               |              |                      |                      |
|-------------------------------|--------------|----------------------|----------------------|
| <b>Data Filename</b>          | llgf4b.d     | <b>Sample Name</b>   | llgf4b               |
| <b>Sample Type</b>            | Sample       | <b>Position</b>      | P1-C4                |
| <b>Instrument Name</b>        | Instrument 1 | <b>User Name</b>     |                      |
| <b>Acq Method</b>             | SIBU.m       | <b>Acquired Time</b> | 4/13/2017 5:06:25 PM |
| <b>IRM Calibration Status</b> | Success      | <b>DA Method</b>     | Default.m            |
| <b>Comment</b>                |              |                      |                      |

|                               |                                                        |              |
|-------------------------------|--------------------------------------------------------|--------------|
| <b>Sample Group</b>           |                                                        | <b>Info.</b> |
| <b>Acquisition SW Version</b> | 6200 series TOF/6500 series<br>Q-TOF B.05.01 (B5125.2) |              |

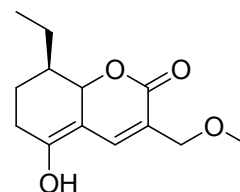

#### User Spectra

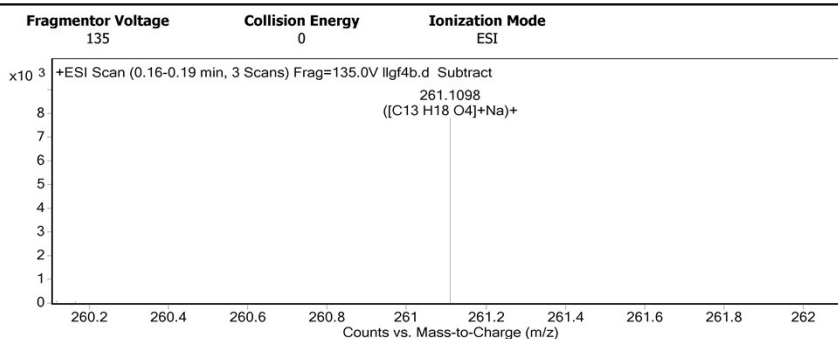

#### Peak List

| m/z      | z | Abund   | Formula    | Ion     |
|----------|---|---------|------------|---------|
| 140.0685 |   | 946.86  |            |         |
| 189.0908 | 1 | 1526.56 |            |         |
| 221.1168 |   | 1220.66 |            |         |
| 261.1098 | 1 | 7823.98 | C13 H18 O4 | (M+Na)+ |
| 262.1145 | 1 | 1280.33 | C13 H18 O4 | (M+Na)+ |
| 277.0841 | 1 | 1696.94 |            |         |
| 281.173  | 1 | 1670.97 |            |         |
| 675.2618 | 1 | 1245.27 |            |         |

#### Formula Calculator Element Limits

| Element | Min | Max |
|---------|-----|-----|
| C       | 3   | 60  |
| H       | 0   | 120 |
| O       | 0   | 30  |

#### Formula Calculator Results

| Formula    | CalculatedMass | CalculatedMz | Mz       | Diff. (mDa) | Diff. (ppm) | DBE    |
|------------|----------------|--------------|----------|-------------|-------------|--------|
| C13 H18 O4 | 238.1205       | 261.1097     | 261.1098 | -0.5        | -2.0        | 5.0000 |

--- End Of Report ---



Figure 44S. <sup>1</sup>H NMR spectrum of **8** (600 MHz, CDCl<sub>3</sub>)

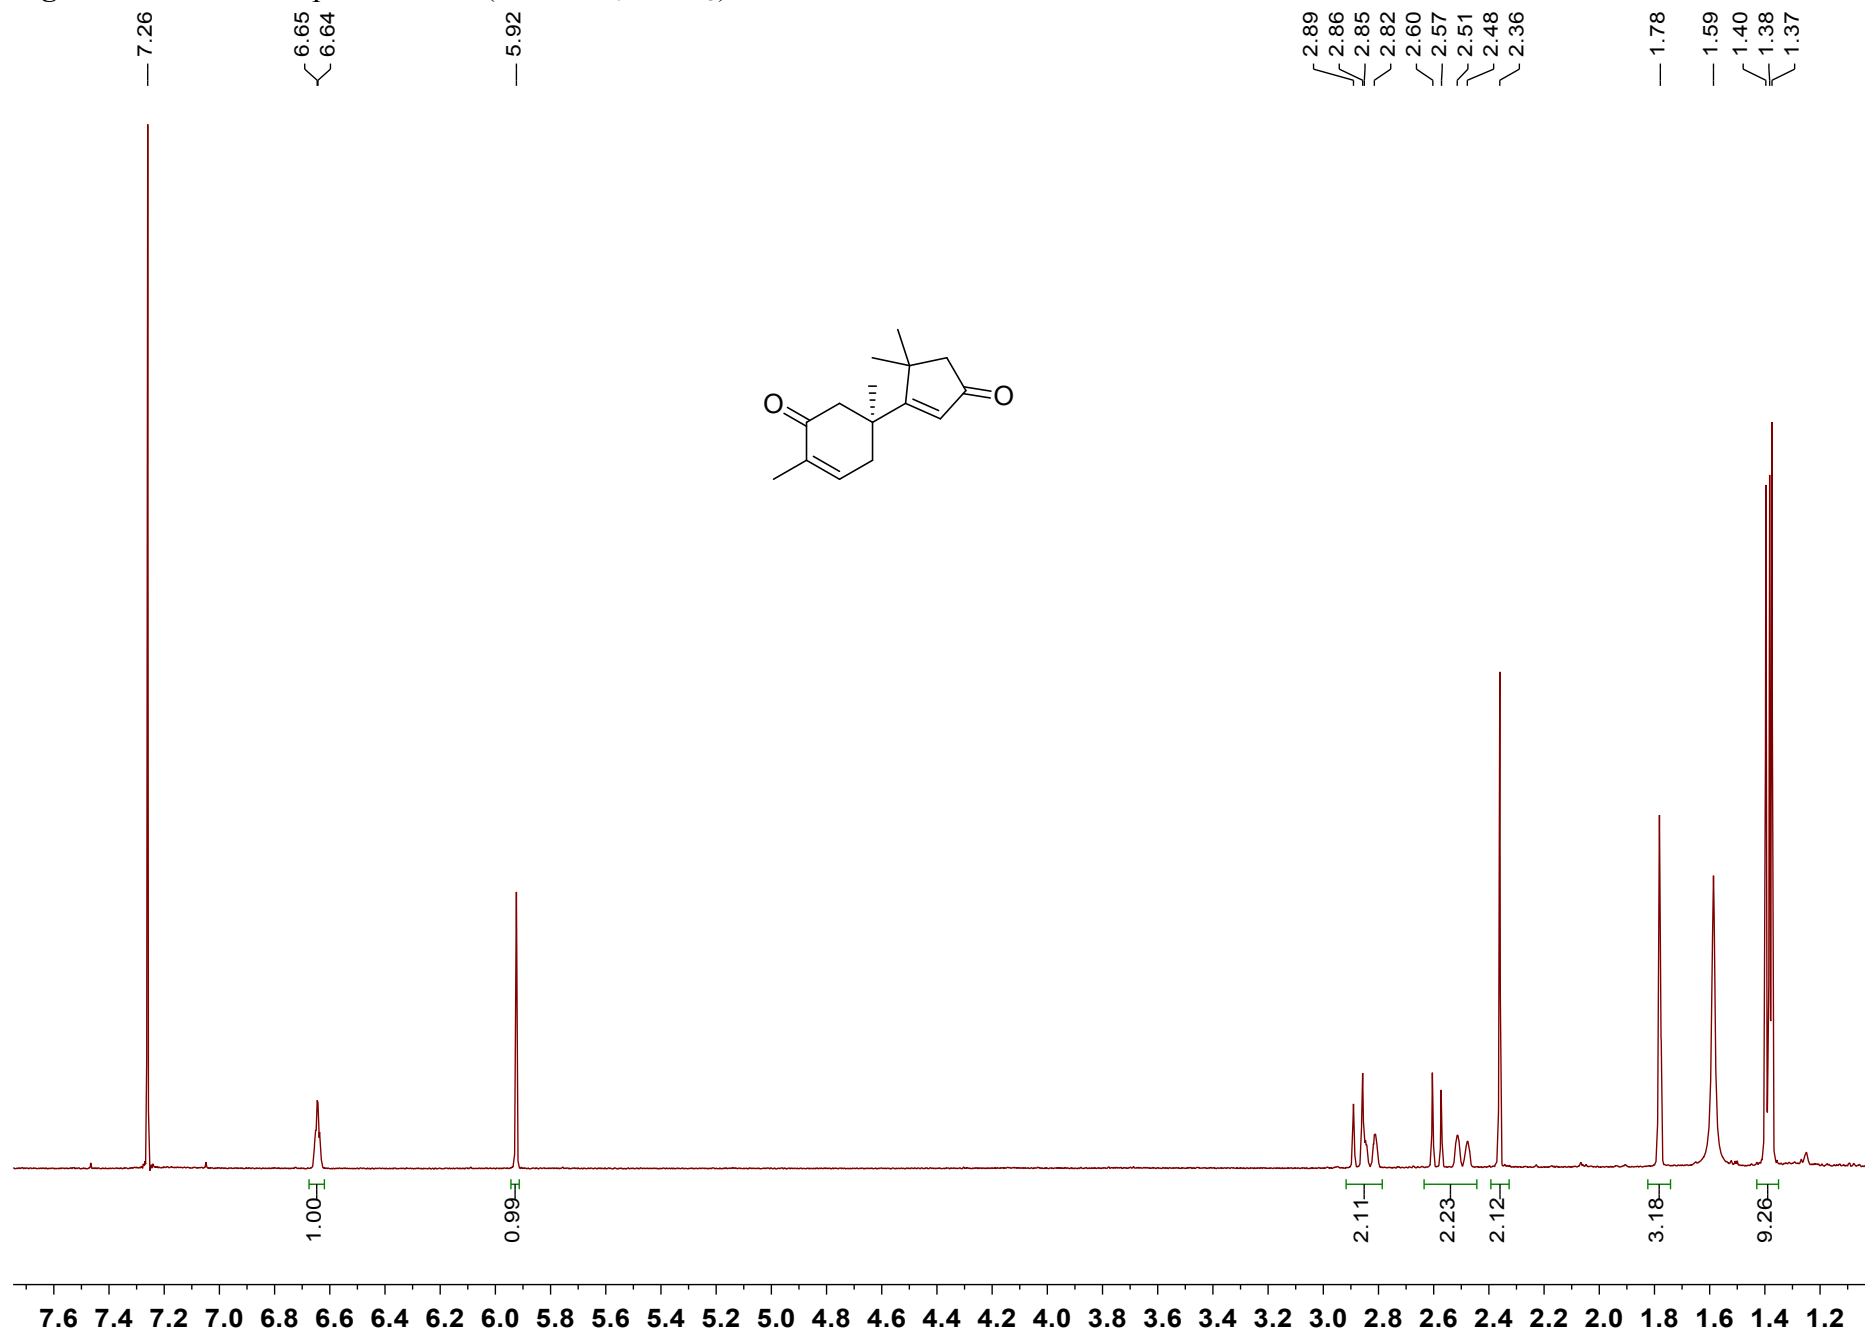

Figure 45S.  $^{13}\text{C}$  NMR and DEPT spectra of **8** (150 MHz,  $\text{CDCl}_3$ )

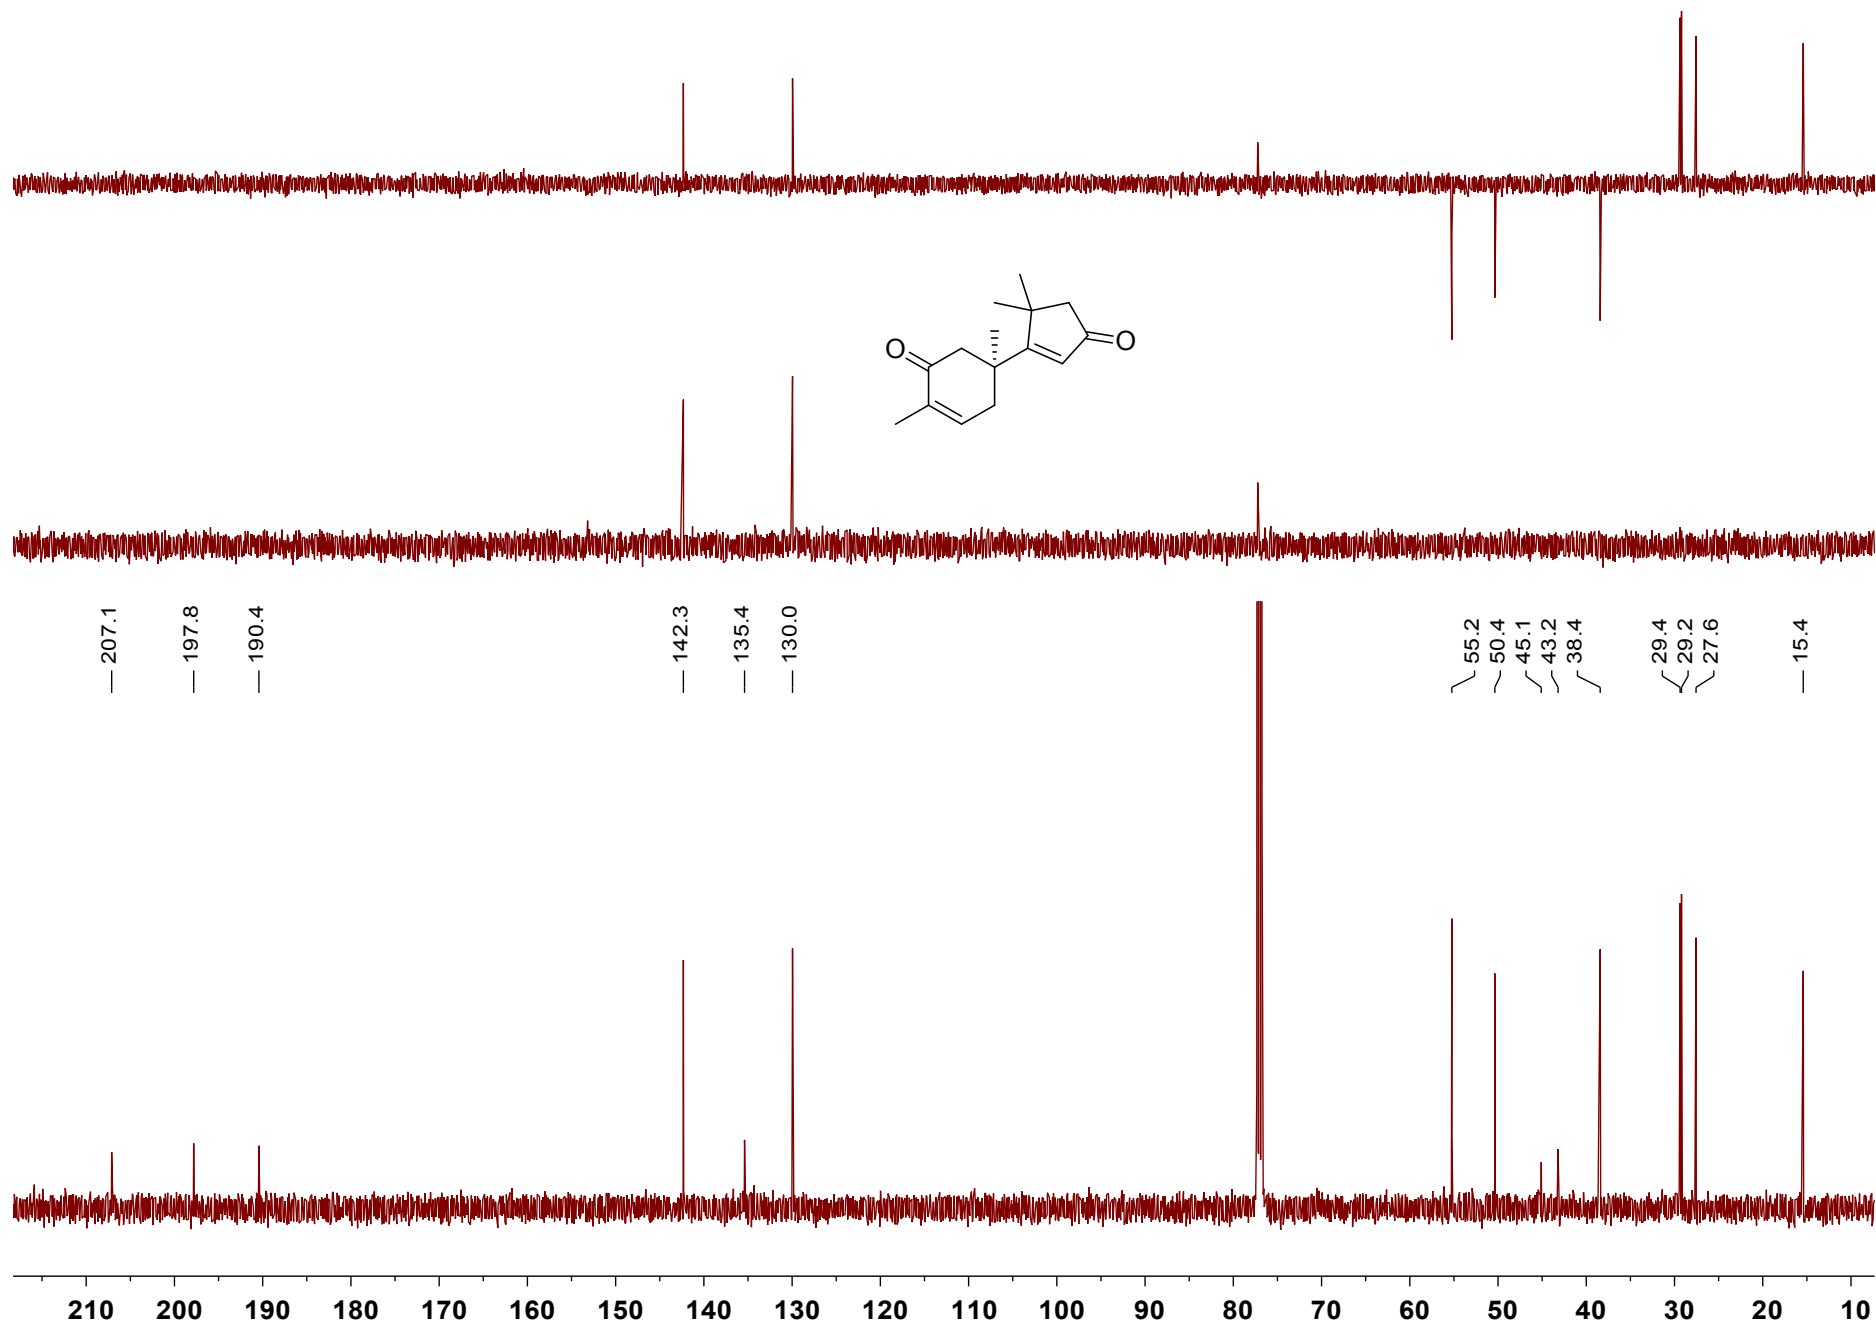

Figure 46S. HSQC spectrum of **8** (CDCl<sub>3</sub>)

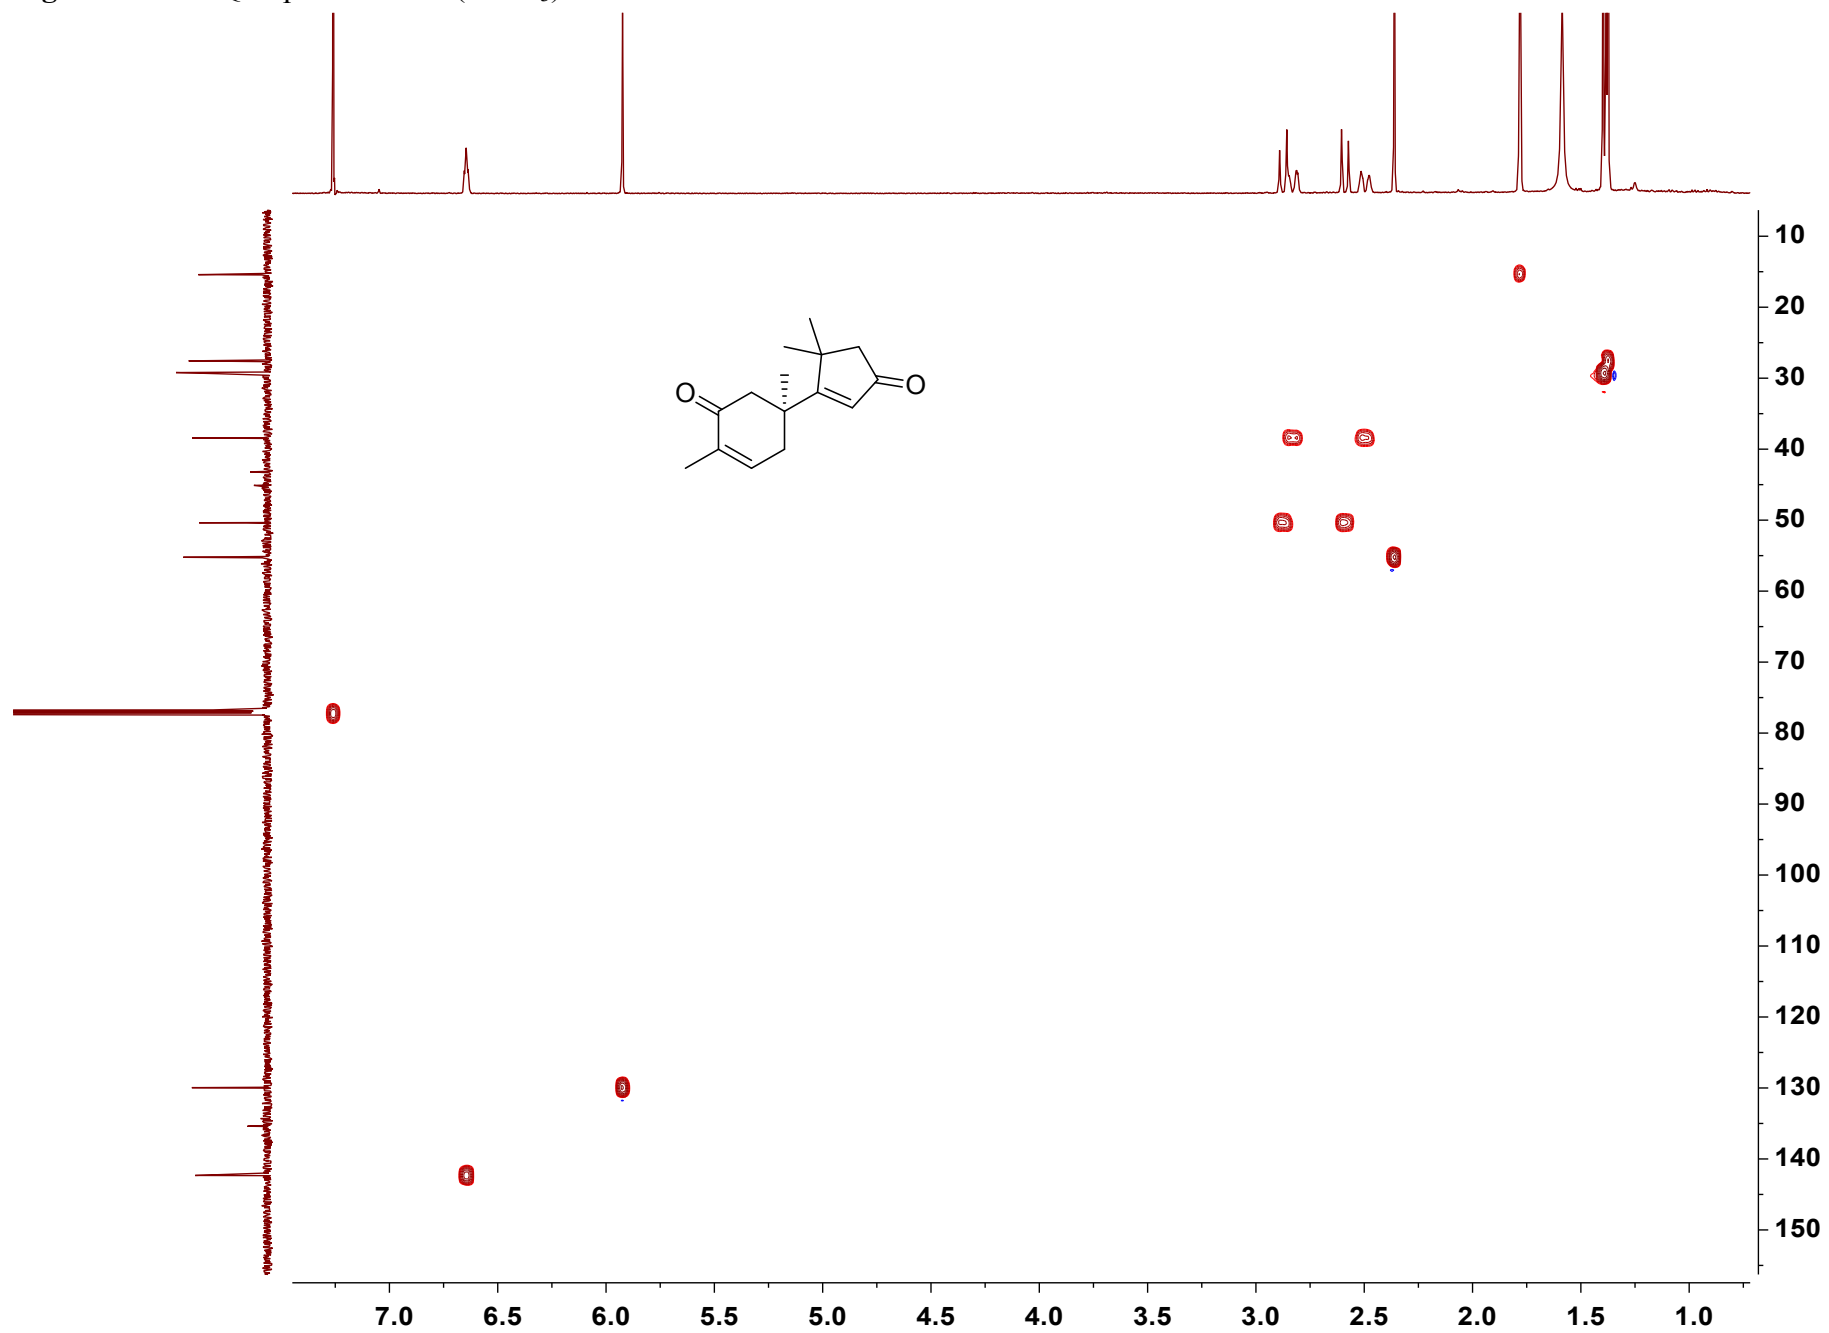

Figure 47S.  $^1\text{H}$ - $^1\text{H}$  COSY spectrum of **8** ( $\text{CDCl}_3$ )

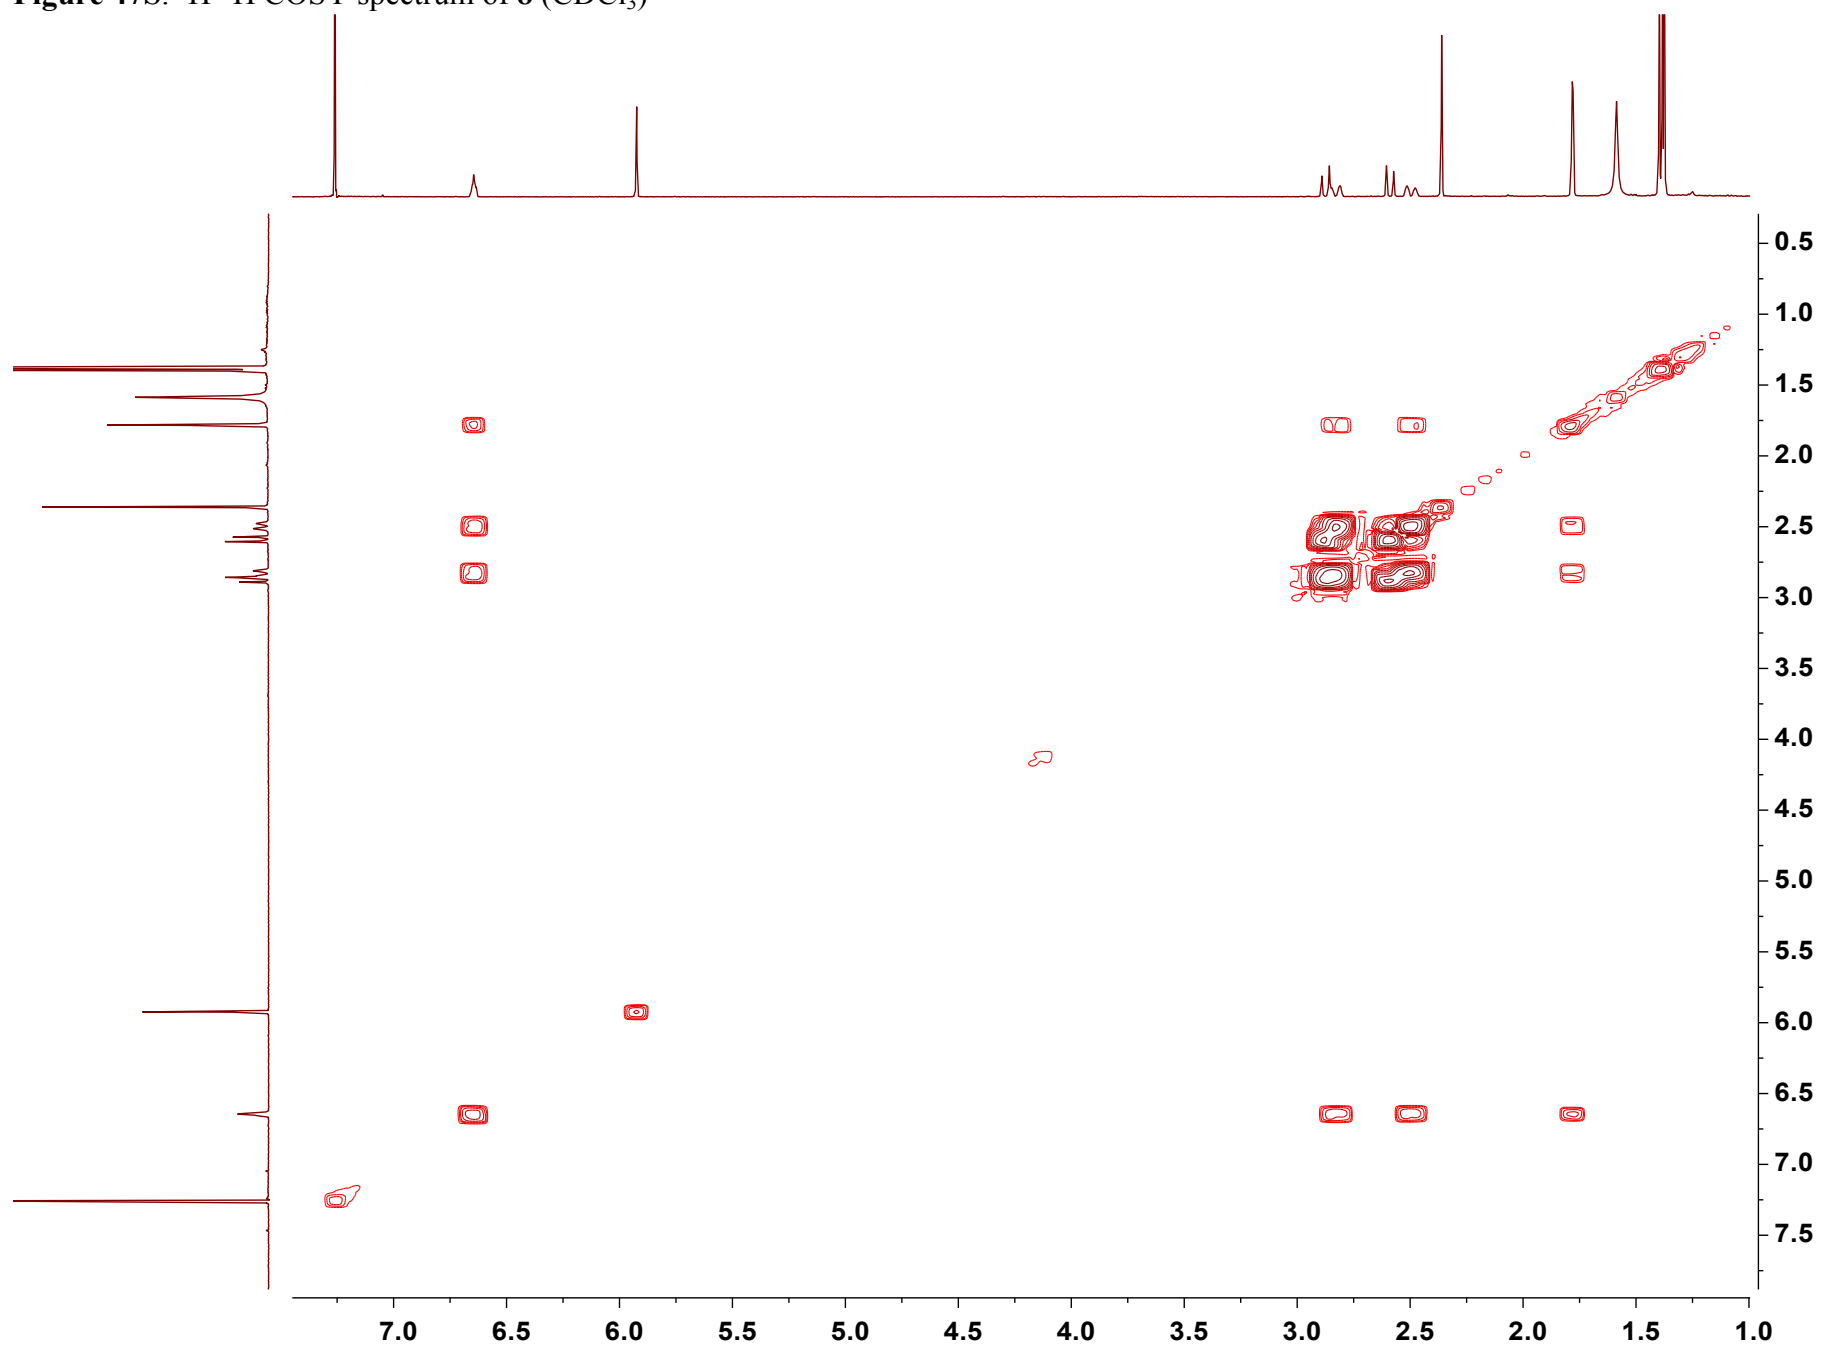

Figure 48S. HMBC spectrum of **8** (CDCl<sub>3</sub>)

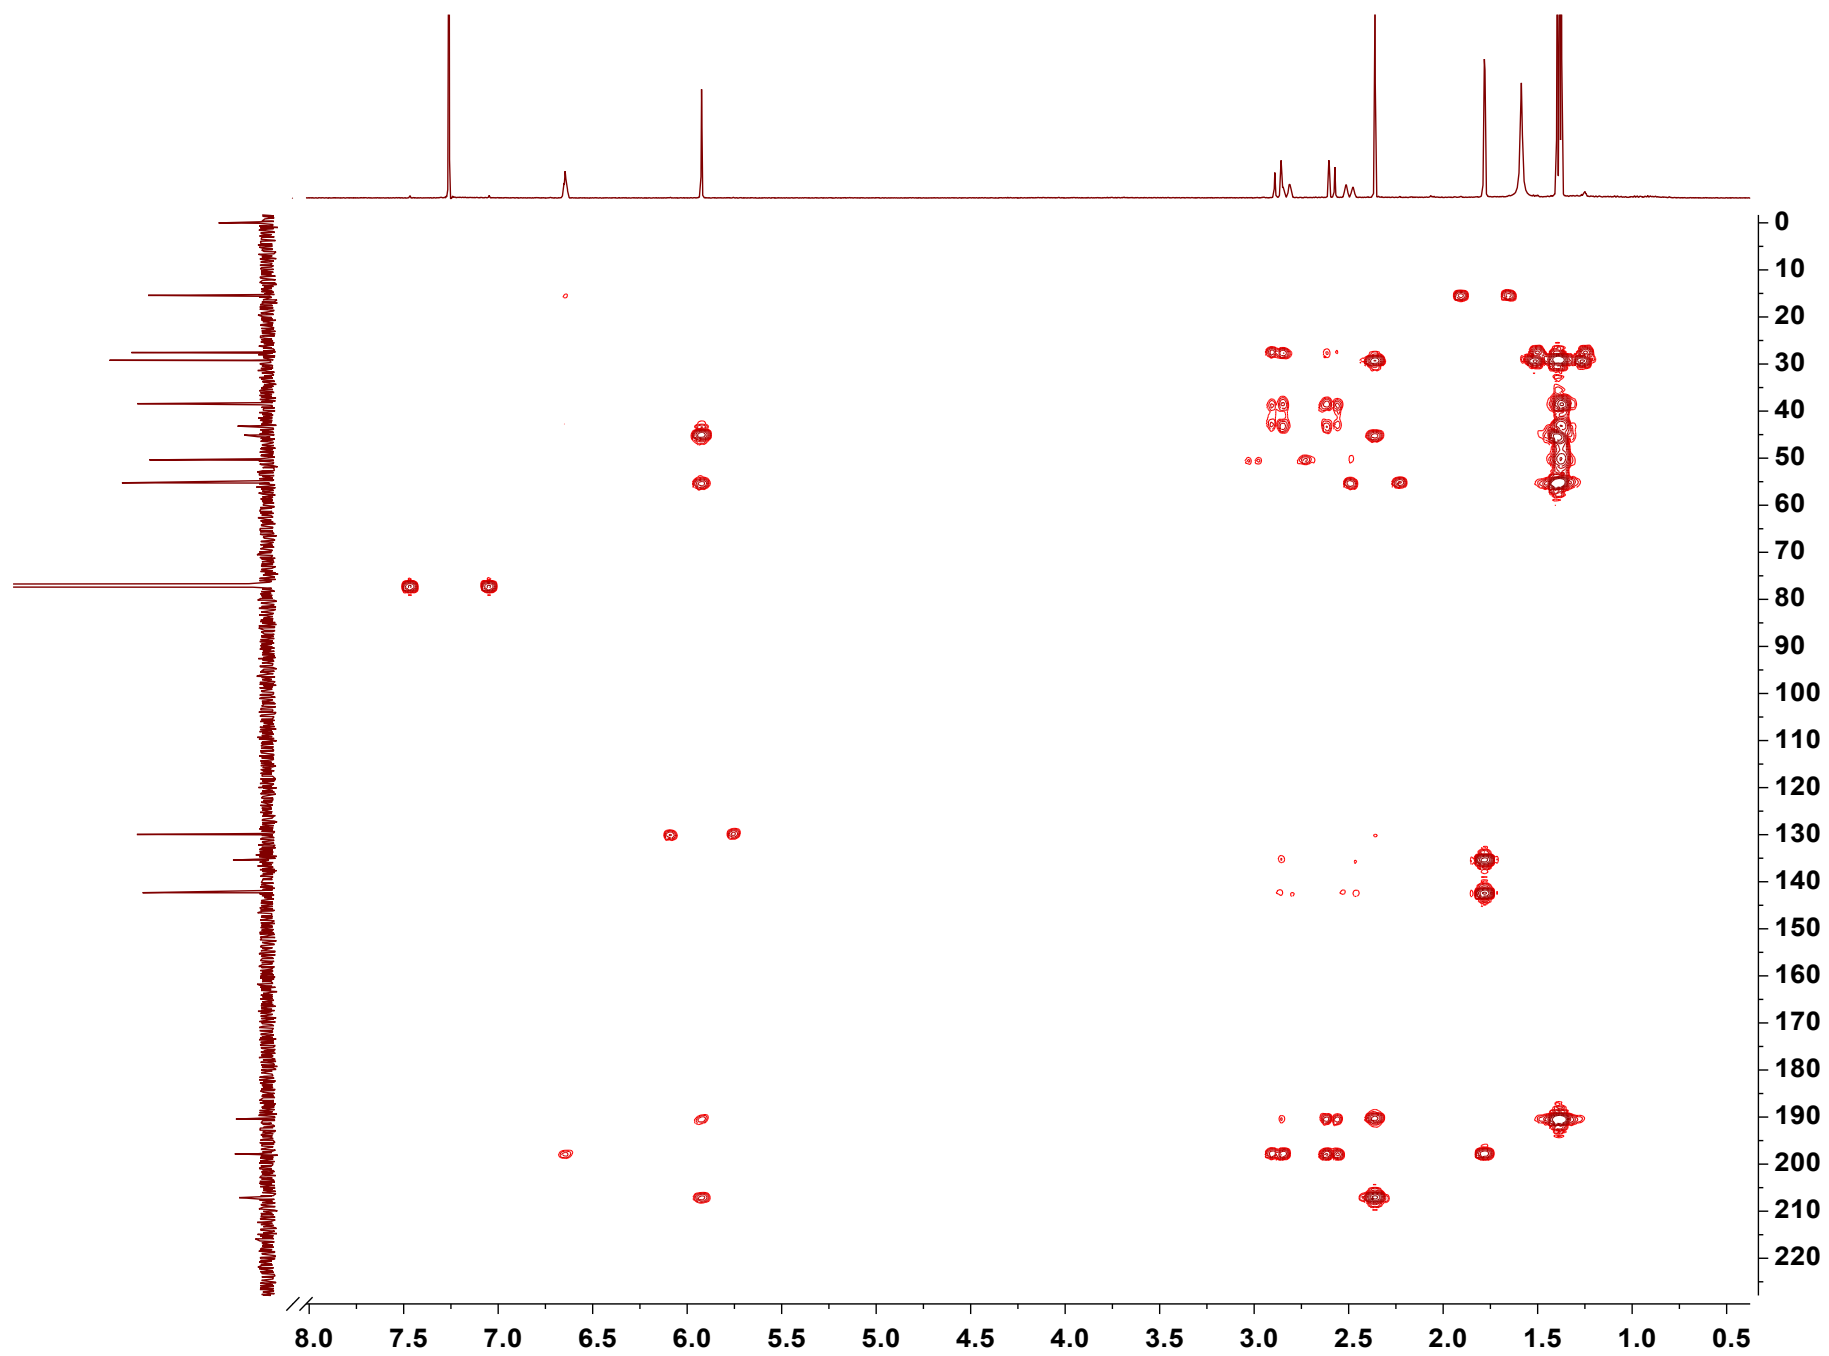

Figure 49S. HREIMS (+) report of 8

### Elemental Composition Report

#### Single Mass Analysis

Tolerance = 10.0 PPM / DBE: min = -10.0, max = 120.0

Selected filters: None

Monoisotopic Mass, Odd and Even Electron Ions

13 formula(e) evaluated with 1 results within limits (up to 51 closest results for each mass)

Elements Used:

C: 0-200 H: 0-400 O: 1-3

Ilq18

14:22:55 16-Feb-2017

Voltage EI+

K1B  
M170217EA-01AFAMM 15 (1.378)  
232.1460

Autospec Premier  
P776  
2.56

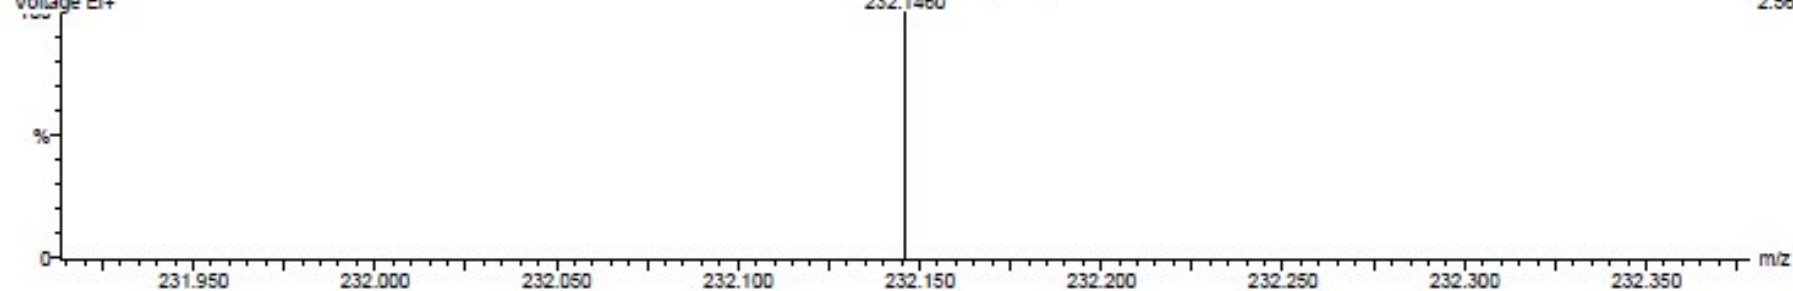

Minimum: -10.0  
Maximum: 200.0 10.0 120.0

| Mass     | Calc. Mass | mDa  | PPM  | DBE | i-FIT     | Formula    |
|----------|------------|------|------|-----|-----------|------------|
| 232.1460 | 232.1463   | -0.3 | -1.3 | 6.0 | 5546025.5 | C15 H20 O2 |

Figure 50S. <sup>1</sup>H NMR spectrum of **9** (500 MHz, CDCl<sub>3</sub>)

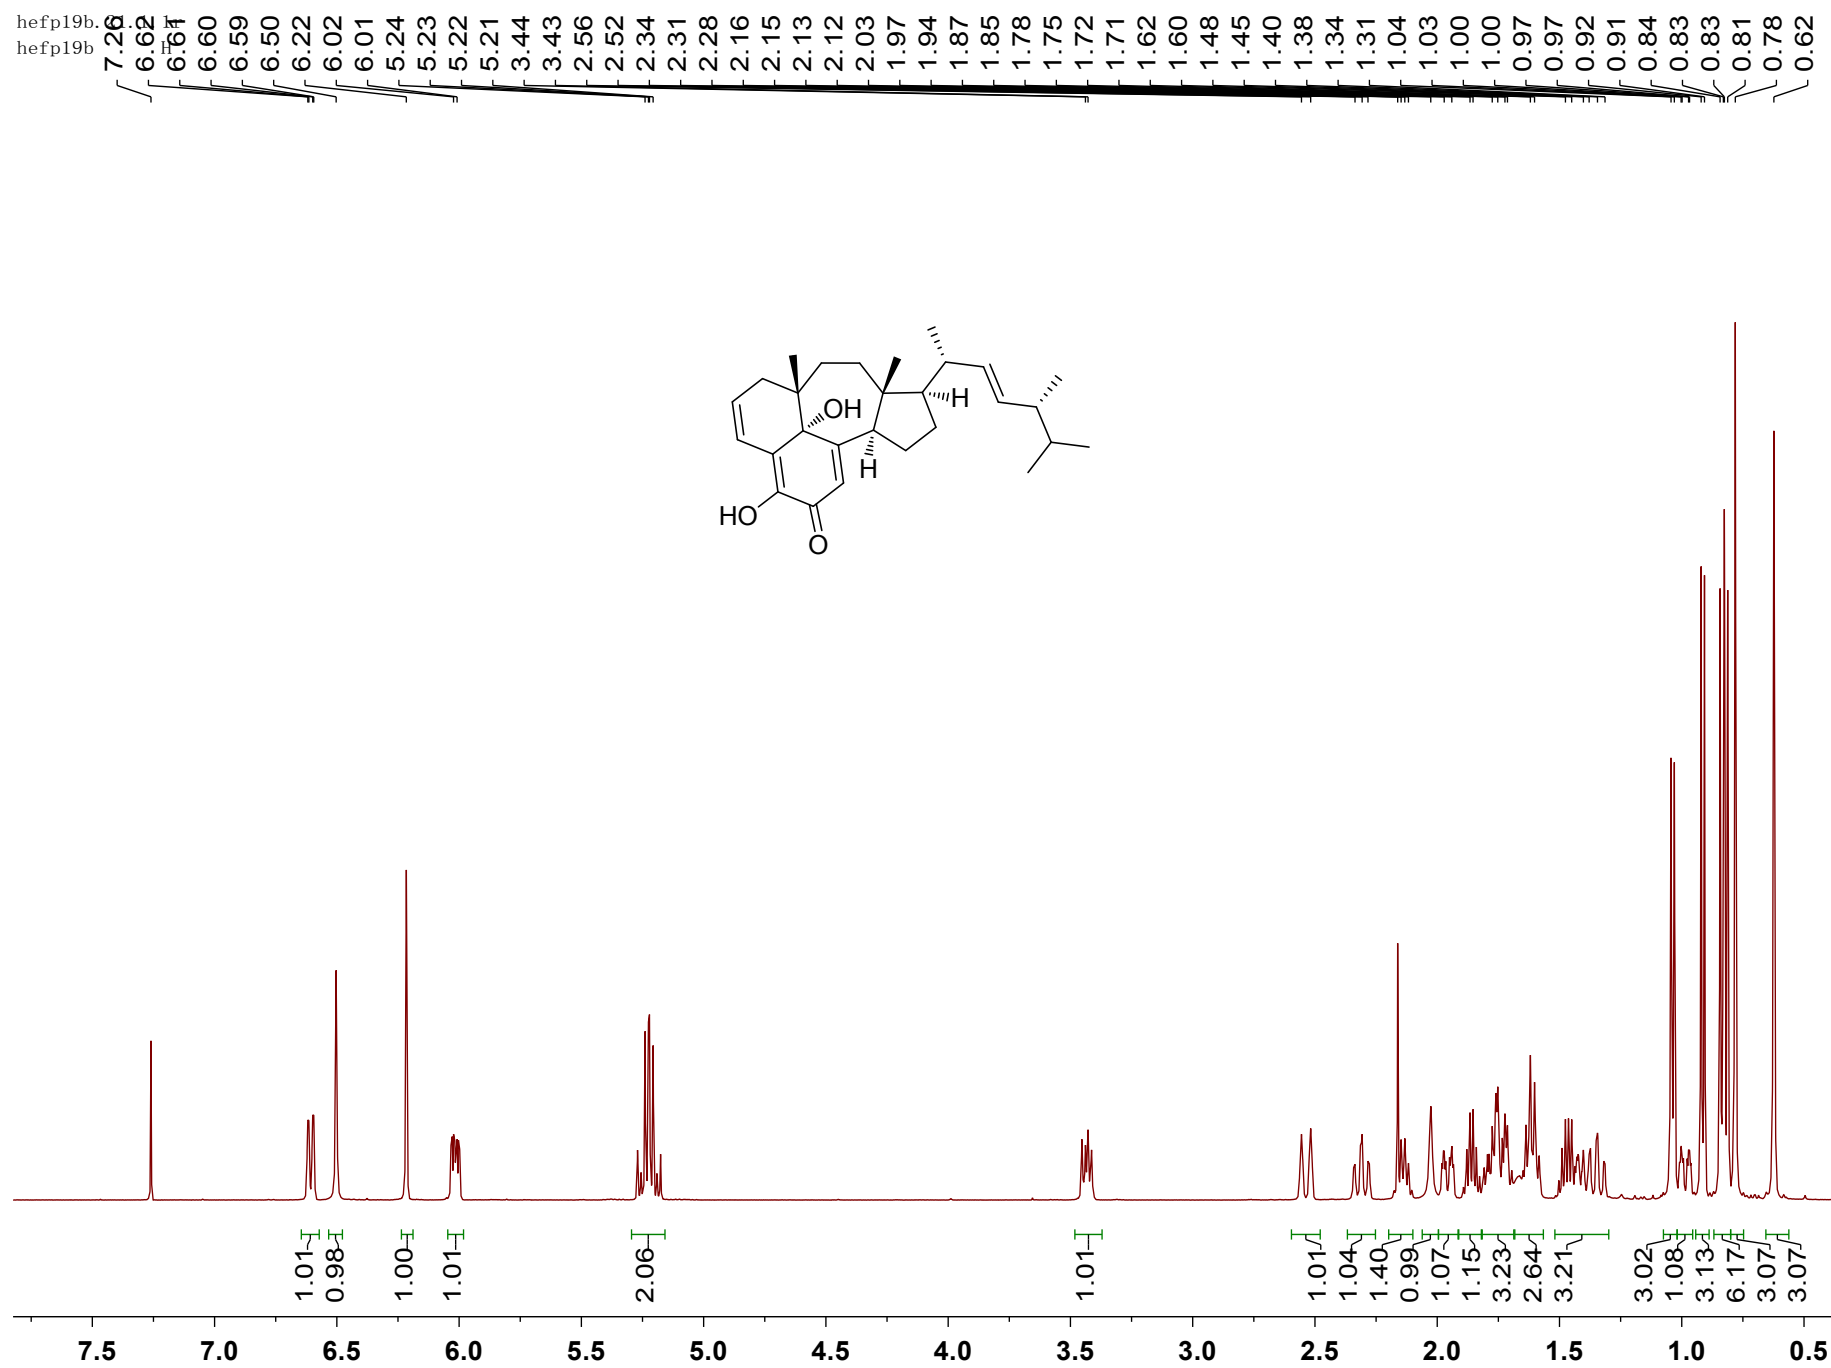

Figure 51S.  $^{13}\text{C}$  NMR and DEPT spectra of **9** (125 MHz,  $\text{CDCl}_3$ )

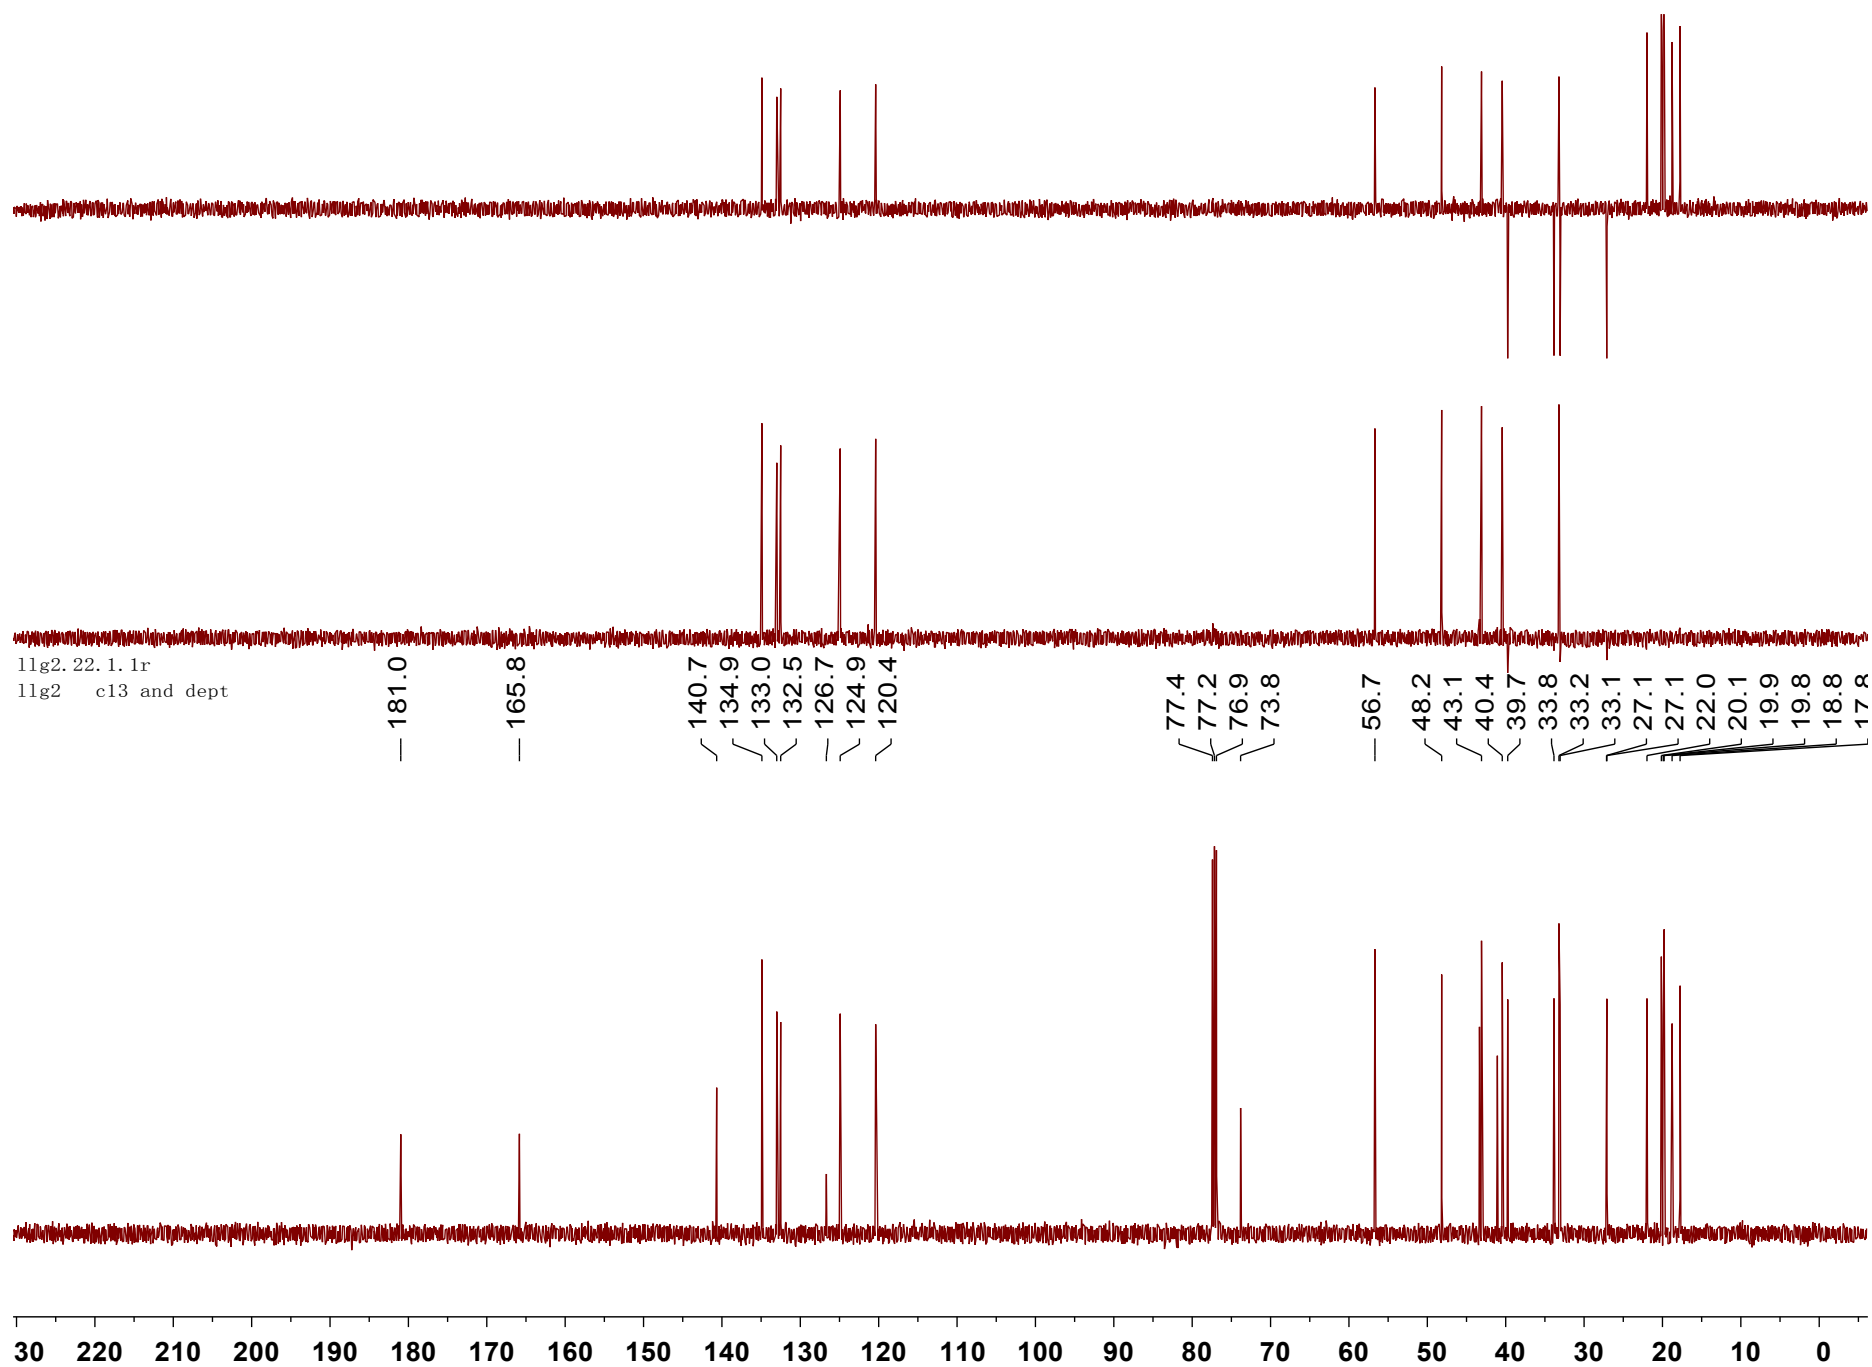



Figure 52S. <sup>1</sup>H NMR spectrum of 9a (500 MHz, CDCl<sub>3</sub>)

11g2ac.21.1.1r - Bruker AViii-500MHz; 11g2ac H

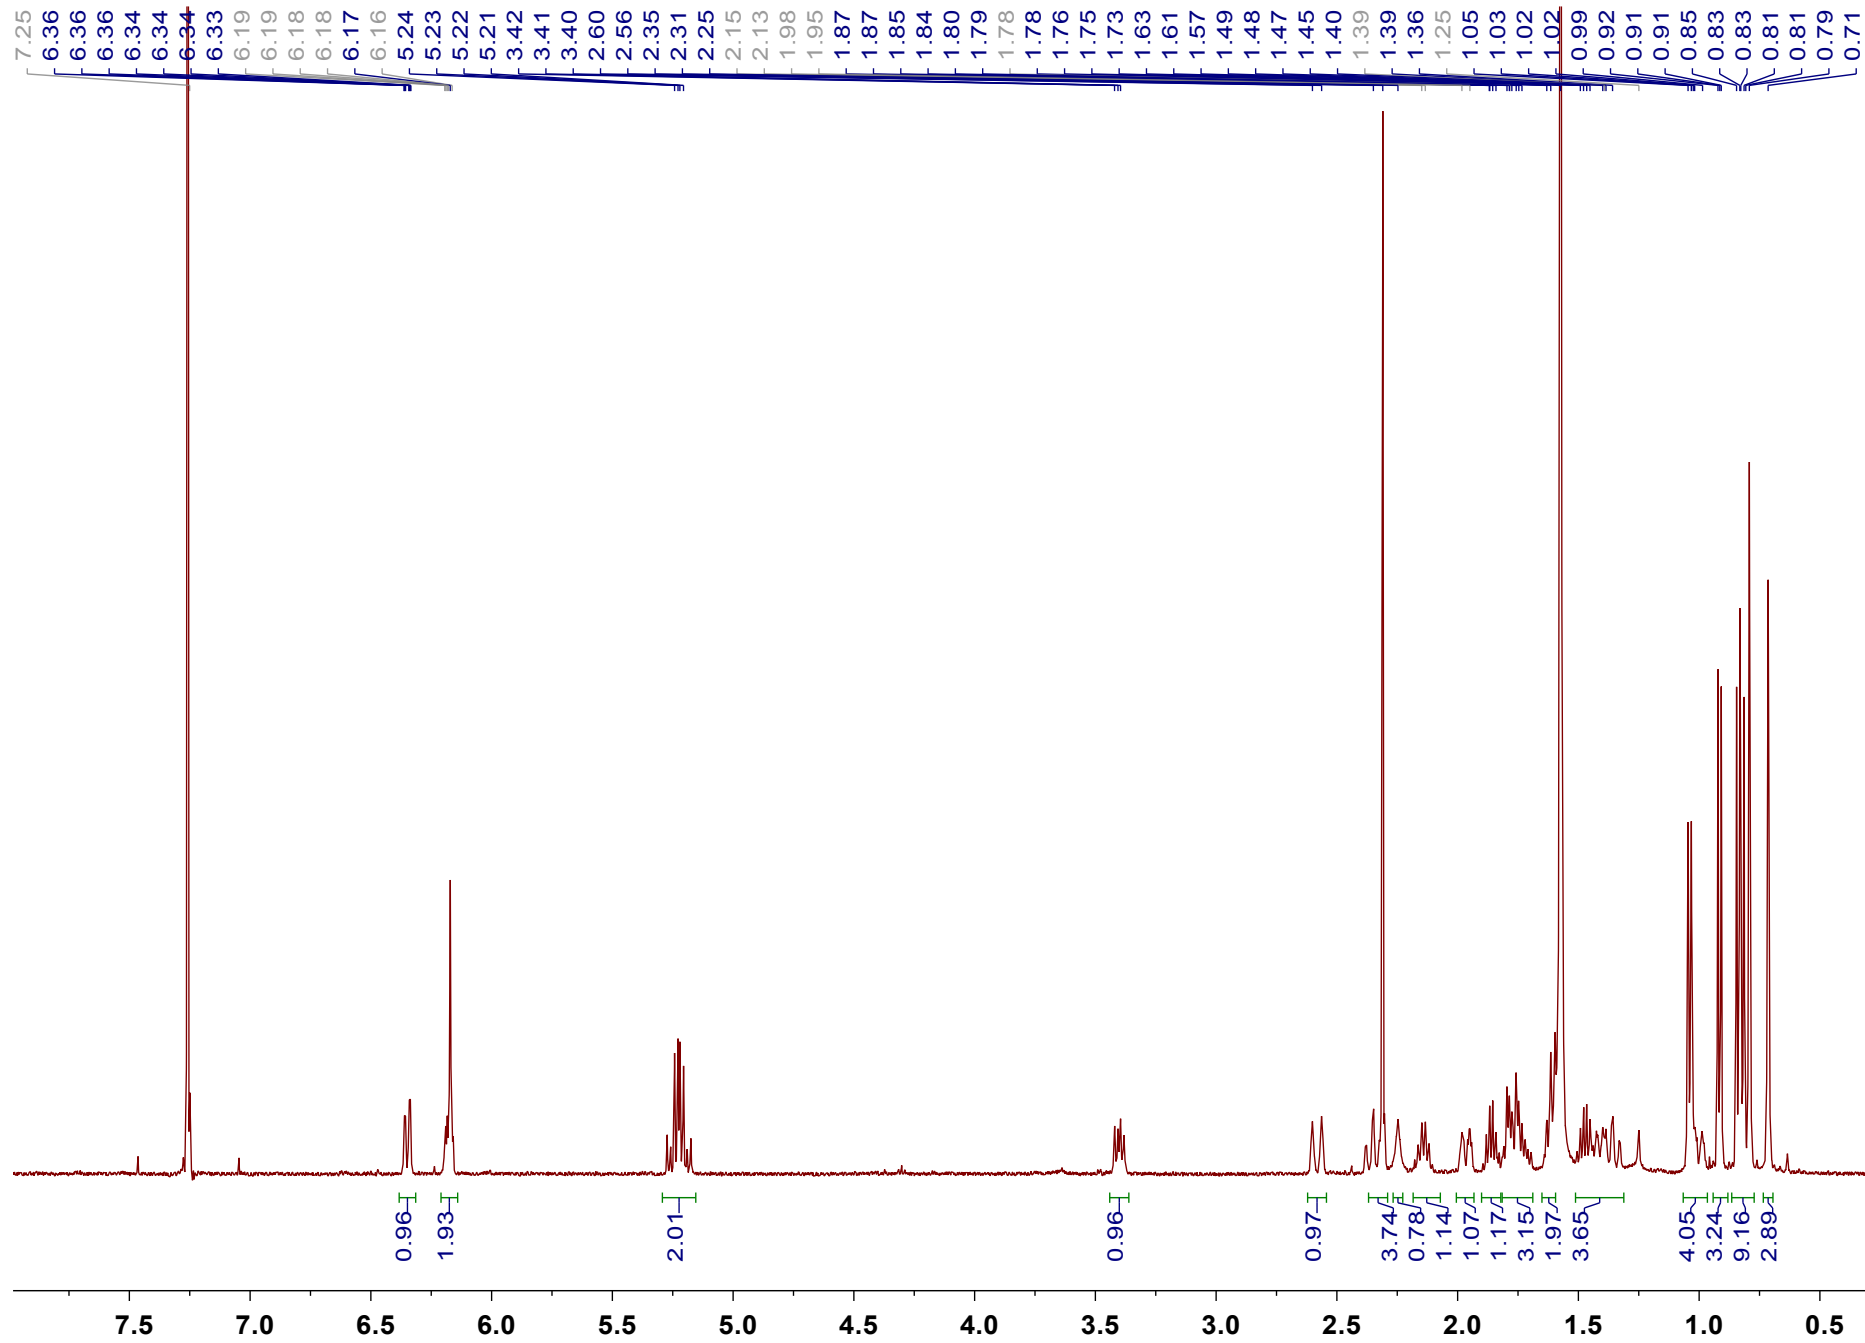

Figure 53S.  $^{13}\text{C}$  NMR and DEPT spectra of **9a** (125 MHz,  $\text{CDCl}_3$ )

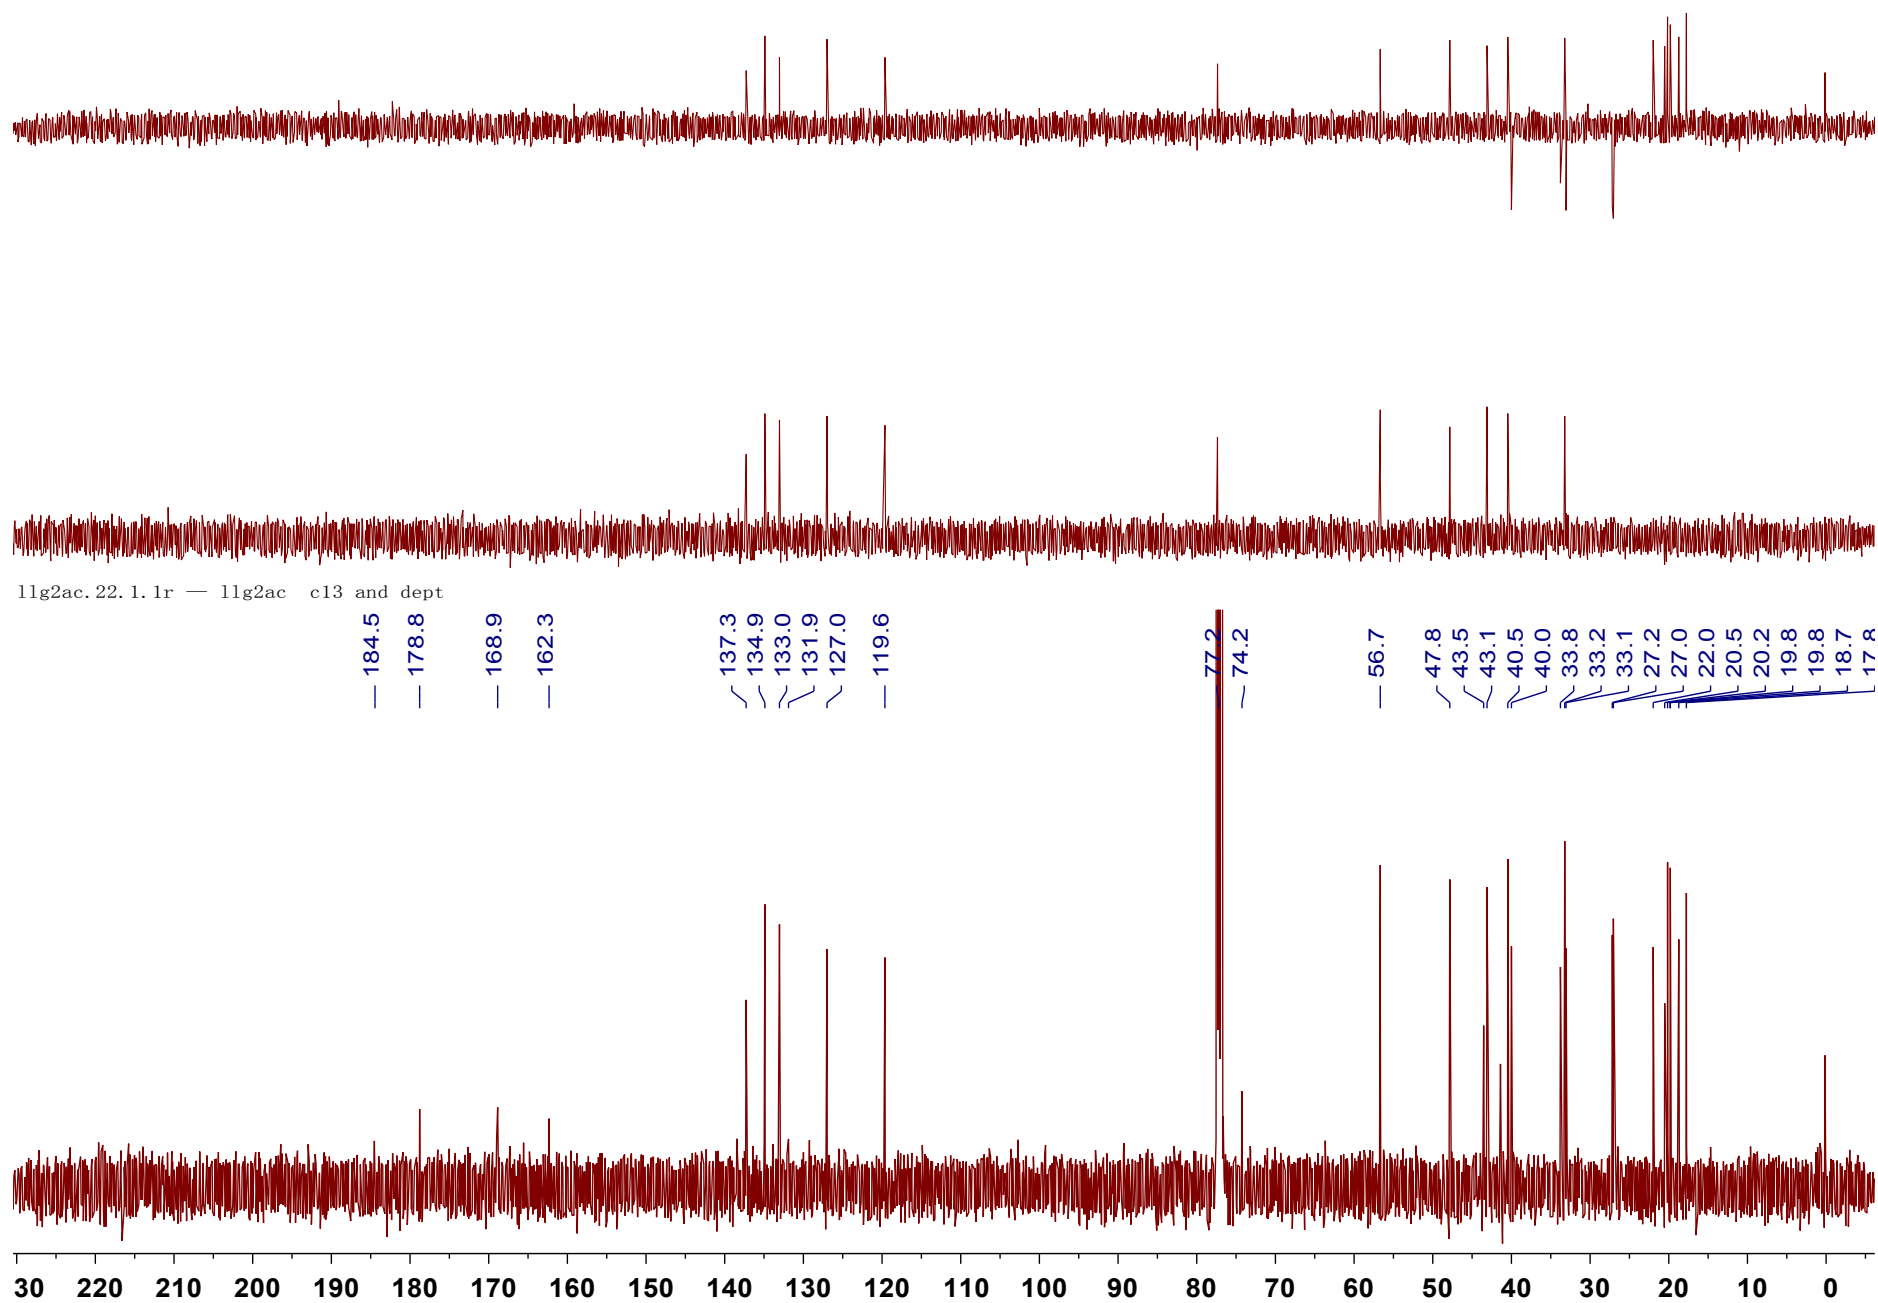

### 3. Computational details for **8**

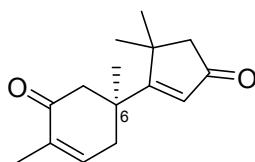

A conformation search based on molecular mechanics with MMFF94s force fields were performed for (6*S*)-**8** gave 10 stable conformers with distributions higher than 1%.<sup>1,2</sup> All these conformers were further optimized by the density functional theory method at the B3LYP/6-31G(d,p) level in Gaussian 09 program package,<sup>3</sup> led to six ((6*S*)-**8a**–(6*S*)-**8f**) conformers within 3 kcal/mol energy threshold from global minimum, respectively. The predominant conformers were subjected to theoretical calculation of ECD using time-dependent density functional theory (TDDFT) at B3LYP/6-31G(d,p) level with IEFPCM model in air based on B3LYP/6-31G(d,p) optimized conformers. The calculated ECD curves for (6*S*)-**8** were weighted using SpecDis 1.71 with  $\sigma = 0.2$  eV, and UV shift 11 nm, respectively.<sup>4</sup> The ECD curve of the enantiomer (6*R*)-**8** was generated by SpecDis by the function “enantiomeric ECD”.

**Table S1.** Energy analysis for conformers of (6*S*)-**8a**–(6*S*)-**8f** at B3LYP/6-31G(d,p) level in the gas phase.

| Species                  | $E'=E+ZPE$  | $E$         | $H$         | $G$         | $\Delta E$ (kcal/mol) | $P_E\%$ |
|--------------------------|-------------|-------------|-------------|-------------|-----------------------|---------|
| (6 <i>S</i> )- <b>8a</b> | -733.761789 | -733.778874 | -733.760845 | -733.822524 | 0.00                  | 50.7    |
| (6 <i>S</i> )- <b>8b</b> | -733.760472 | -733.777482 | -733.759528 | -733.820998 | 0.96                  | 9.2     |
| (6 <i>S</i> )- <b>8c</b> | -733.760548 | -733.777528 | -733.759603 | -733.820912 | 1.01                  | 5.1     |
| (6 <i>S</i> )- <b>8d</b> | -733.761192 | -733.778096 | -733.760248 | -733.821357 | 0.73                  | 13.3    |
| (6 <i>S</i> )- <b>8e</b> | -733.761144 | -733.778017 | -733.760200 | -733.821137 | 0.87                  | 10.1    |
| (6 <i>S</i> )- <b>8f</b> | -733.760329 | -733.777416 | -733.759384 | -733.821258 | 0.79                  | 11.7    |

$E, E', H, G$ : total energy, total energy with zero point energy (ZPE), enthalpy, and Gibbs free energy

Standard orientation of (6*S*)-**8a**

| Atom | X     | Y      | Z      |
|------|-------|--------|--------|
| C(1) | 0.595 | -0.102 | 1.871  |
| C(2) | 0.371 | -0.265 | 0.341  |
| C(3) | 0.981 | -1.622 | -0.107 |
| C(4) | 1.135 | 0.847  | -0.420 |
| C(5) | 2.484 | -1.644 | -0.150 |
| C(6) | 3.279 | -0.560 | -0.211 |

|       |        |        |        |
|-------|--------|--------|--------|
| C(7)  | 2.651  | 0.784  | -0.260 |
| C(8)  | 4.782  | -0.614 | -0.228 |
| O(9)  | 3.321  | 1.807  | -0.232 |
| C(10) | -3.477 | 0.407  | 0.033  |
| C(11) | -3.314 | -1.096 | -0.165 |
| C(12) | -1.875 | -1.378 | -0.041 |
| C(13) | -1.141 | -0.251 | 0.081  |
| C(14) | -2.046 | 1.010  | -0.044 |
| O(15) | -4.207 | -1.902 | -0.357 |
| C(16) | -1.849 | 2.064  | 1.062  |
| C(17) | -1.871 | 1.680  | -1.431 |
| H(18) | 0.029  | -0.858 | 2.422  |
| H(19) | 1.654  | -0.225 | 2.116  |
| H(20) | 0.284  | 0.882  | 2.224  |
| H(21) | 0.639  | -2.425 | 0.556  |
| H(22) | 0.600  | -1.883 | -1.106 |
| H(23) | 0.934  | 0.753  | -1.497 |
| H(24) | 0.829  | 1.851  | -0.120 |
| H(25) | 2.945  | -2.632 | -0.136 |
| H(26) | 5.142  | -1.645 | -0.185 |
| H(27) | 5.178  | -0.139 | -1.131 |
| H(28) | 5.198  | -0.057 | 0.618  |
| H(29) | -4.174 | 0.829  | -0.696 |
| H(30) | -3.917 | 0.564  | 1.026  |
| H(31) | -1.507 | -2.397 | -0.050 |
| H(32) | -0.866 | 2.541  | 1.021  |
| H(33) | -1.978 | 1.629  | 2.058  |
| H(34) | -2.598 | 2.855  | 0.947  |
| H(35) | -2.029 | 0.958  | -2.239 |
| H(36) | -2.612 | 2.479  | -1.544 |
| H(37) | -0.886 | 2.129  | -1.562 |

Standard orientation of (6*S*)-**8b**

| Atom | X      | Y      | Z      |
|------|--------|--------|--------|
| C(1) | -0.637 | -1.700 | -1.193 |
| C(2) | -0.342 | -0.526 | -0.228 |
| C(3) | -0.874 | -0.896 | 1.192  |
| C(4) | -1.134 | 0.706  | -0.732 |
| C(5) | -2.373 | -0.872 | 1.313  |
| C(6) | -3.211 | -0.231 | 0.477  |
| C(7) | -2.650 | 0.537  | -0.666 |
| C(8) | -4.708 | -0.241 | 0.616  |
| O(9) | -3.376 | 1.070  | -1.493 |

|       |        |        |        |
|-------|--------|--------|--------|
| C(10) | 3.354  | 0.579  | 0.501  |
| C(11) | 3.457  | -0.818 | -0.101 |
| C(12) | 2.080  | -1.259 | -0.372 |
| C(13) | 1.172  | -0.291 | -0.125 |
| C(14) | 1.883  | 1.034  | 0.284  |
| O(15) | 4.482  | -1.449 | -0.290 |
| C(16) | 1.856  | 2.053  | -0.884 |
| C(17) | 1.344  | 1.699  | 1.567  |
| H(18) | -0.214 | -2.640 | -0.831 |
| H(19) | -1.713 | -1.852 | -1.300 |
| H(20) | -0.224 | -1.499 | -2.186 |
| H(21) | -0.499 | -1.890 | 1.466  |
| H(22) | -0.461 | -0.215 | 1.947  |
| H(23) | -0.911 | 1.587  | -0.120 |
| H(24) | -0.878 | 0.957  | -1.765 |
| H(25) | -2.791 | -1.417 | 2.159  |
| H(26) | -5.022 | -0.832 | 1.480  |
| H(27) | -5.096 | 0.777  | 0.725  |
| H(28) | -5.177 | -0.652 | -0.283 |
| H(29) | 3.592  | 0.500  | 1.569  |
| H(30) | 4.093  | 1.253  | 0.060  |
| H(31) | 1.880  | -2.260 | -0.733 |
| H(32) | 0.852  | 2.414  | -1.112 |
| H(33) | 2.272  | 1.611  | -1.795 |
| H(34) | 2.467  | 2.924  | -0.623 |
| H(35) | 1.383  | 1.012  | 2.419  |
| H(36) | 1.966  | 2.565  | 1.816  |
| H(37) | 0.317  | 2.059  | 1.466  |

Standard orientation of (6S)-**8c**

| Atom  | X      | Y      | Z      |
|-------|--------|--------|--------|
| C(1)  | 0.243  | -1.930 | -2.028 |
| C(2)  | -0.353 | -1.008 | -0.934 |
| C(3)  | -1.054 | -1.871 | 0.148  |
| C(4)  | -1.476 | -0.162 | -1.581 |
| C(5)  | -1.943 | -1.073 | 1.067  |
| C(6)  | -2.482 | 0.122  | 0.761  |
| C(7)  | -2.238 | 0.705  | -0.587 |
| C(8)  | -3.344 | 0.922  | 1.697  |
| O(9)  | -2.675 | 1.804  | -0.899 |
| C(10) | 2.895  | 0.626  | 0.515  |
| C(11) | 2.181  | 1.752  | -0.226 |
| C(12) | 0.952  | 1.167  | -0.788 |

|       |        |        |        |
|-------|--------|--------|--------|
| C(13) | 0.765  | -0.109 | -0.384 |
| C(14) | 1.855  | -0.520 | 0.651  |
| O(15) | 2.576  | 2.897  | -0.352 |
| C(16) | 1.285  | -0.485 | 2.092  |
| C(17) | 2.525  | -1.884 | 0.400  |
| H(18) | 0.969  | -2.637 | -1.623 |
| H(19) | -0.557 | -2.508 | -2.502 |
| H(20) | 0.739  | -1.338 | -2.803 |
| H(21) | -1.666 | -2.626 | -0.370 |
| H(22) | -0.330 | -2.444 | 0.733  |
| H(23) | -1.119 | 0.469  | -2.398 |
| H(24) | -2.206 | -0.858 | -2.021 |
| H(25) | -2.158 | -1.513 | 2.040  |
| H(26) | -3.475 | 0.410  | 2.654  |
| H(27) | -2.901 | 1.906  | 1.881  |
| H(28) | -4.329 | 1.108  | 1.257  |
| H(29) | 3.746  | 0.311  | -0.102 |
| H(30) | 3.300  | 0.972  | 1.470  |
| H(31) | 0.308  | 1.746  | -1.437 |
| H(32) | 0.530  | -1.253 | 2.270  |
| H(33) | 0.835  | 0.487  | 2.312  |
| H(34) | 2.098  | -0.654 | 2.807  |
| H(35) | 2.951  | -1.945 | -0.606 |
| H(36) | 3.344  | -2.021 | 1.114  |
| H(37) | 1.838  | -2.725 | 0.532  |

Standard orientation of (6*S*)-**8d**

| Atom  | X      | Y      | Z      |
|-------|--------|--------|--------|
| C(1)  | 0.617  | -0.260 | 1.829  |
| C(2)  | 0.390  | -0.052 | 0.305  |
| C(3)  | 0.951  | -1.261 | -0.492 |
| C(4)  | 1.199  | 1.194  | -0.137 |
| C(5)  | 2.454  | -1.343 | -0.507 |
| C(6)  | 3.289  | -0.308 | -0.305 |
| C(7)  | 2.714  | 1.036  | -0.042 |
| C(8)  | 4.788  | -0.416 | -0.324 |
| O(9)  | 3.429  | 1.999  | 0.197  |
| C(10) | -3.524 | -0.106 | 0.075  |
| C(11) | -3.125 | 1.341  | -0.192 |
| C(12) | -1.658 | 1.393  | -0.096 |
| C(13) | -1.111 | 0.169  | 0.065  |
| C(14) | -2.211 | -0.935 | -0.001 |
| O(15) | -3.882 | 2.270  | -0.412 |

|       |        |        |        |
|-------|--------|--------|--------|
| C(16) | -2.181 | -1.673 | -1.365 |
| C(17) | -2.165 | -1.973 | 1.136  |
| H(18) | 0.114  | -1.153 | 2.201  |
| H(19) | 1.684  | -0.366 | 2.047  |
| H(20) | 0.241  | 0.602  | 2.388  |
| H(21) | 0.550  | -2.201 | -0.100 |
| H(22) | 0.607  | -1.200 | -1.534 |
| H(23) | 0.969  | 1.427  | -1.186 |
| H(24) | 0.941  | 2.079  | 0.450  |
| H(25) | 2.876  | -2.325 | -0.720 |
| H(26) | 5.111  | -1.441 | -0.523 |
| H(27) | 5.215  | 0.244  | -1.087 |
| H(28) | 5.211  | -0.091 | 0.632  |
| H(29) | -3.958 | -0.150 | 1.082  |
| H(30) | -4.297 | -0.440 | -0.622 |
| H(31) | -1.131 | 2.337  | -0.152 |
| H(32) | -1.299 | -2.305 | -1.484 |
| H(33) | -2.211 | -0.963 | -2.197 |
| H(34) | -3.059 | -2.322 | -1.444 |
| H(35) | -2.201 | -1.495 | 2.120  |
| H(36) | -3.035 | -2.635 | 1.058  |
| H(37) | -1.274 | -2.605 | 1.094  |

Standard orientation of (6*S*)-**8e**

| Atom  | X      | Y      | Z      |
|-------|--------|--------|--------|
| C(1)  | 0.653  | -1.118 | 1.420  |
| C(2)  | 0.395  | -0.186 | 0.213  |
| C(3)  | 0.923  | -0.854 | -1.097 |
| C(4)  | 1.223  | 1.108  | 0.416  |
| C(5)  | 2.425  | -0.896 | -1.201 |
| C(6)  | 3.278  | -0.126 | -0.502 |
| C(7)  | 2.728  | 0.879  | 0.447  |
| C(8)  | 4.776  | -0.215 | -0.606 |
| O(9)  | 3.457  | 1.538  | 1.174  |
| C(10) | -3.458 | -0.064 | -0.465 |
| C(11) | -3.012 | 1.394  | -0.473 |
| C(12) | -1.557 | 1.383  | -0.239 |
| C(13) | -1.095 | 0.145  | 0.041  |
| C(14) | -2.277 | -0.864 | 0.151  |
| O(15) | -3.717 | 2.367  | -0.669 |
| C(16) | -2.081 | -2.195 | -0.597 |
| C(17) | -2.615 | -1.152 | 1.637  |
| H(18) | 0.147  | -2.080 | 1.313  |

|       |        |        |        |
|-------|--------|--------|--------|
| H(19) | 1.721  | -1.325 | 1.520  |
| H(20) | 0.317  | -0.653 | 2.351  |
| H(21) | 0.535  | -1.873 | -1.191 |
| H(22) | 0.526  | -0.306 | -1.965 |
| H(23) | 1.046  | 1.794  | -0.422 |
| H(24) | 0.939  | 1.633  | 1.332  |
| H(25) | 2.830  | -1.619 | -1.909 |
| H(26) | 5.080  | -0.980 | -1.325 |
| H(27) | 5.202  | 0.747  | -0.911 |
| H(28) | 5.217  | -0.449 | 0.368  |
| H(29) | -4.404 | -0.190 | 0.067  |
| H(30) | -3.631 | -0.362 | -1.507 |
| H(31) | -0.981 | 2.297  | -0.298 |
| H(32) | -1.295 | -2.815 | -0.157 |
| H(33) | -1.841 | -2.034 | -1.653 |
| H(34) | -3.009 | -2.775 | -0.555 |
| H(35) | -2.798 | -0.222 | 2.184  |
| H(36) | -3.526 | -1.759 | 1.692  |
| H(37) | -1.825 | -1.699 | 2.153  |

Standard orientation of (6*S*)-**8f**

| Atom  | X      | Y      | Z      |
|-------|--------|--------|--------|
| C(1)  | 0.653  | 0.775  | 1.652  |
| C(2)  | 0.387  | -0.092 | 0.398  |
| C(3)  | 1.039  | -1.484 | 0.619  |
| C(4)  | 1.100  | 0.534  | -0.837 |
| C(5)  | 2.544  | -1.464 | 0.608  |
| C(6)  | 3.299  | -0.535 | -0.008 |
| C(7)  | 2.624  | 0.574  | -0.729 |
| C(8)  | 4.802  | -0.536 | -0.015 |
| O(9)  | 3.261  | 1.470  | -1.264 |
| C(10) | -3.382 | 0.293  | -0.585 |
| C(11) | -3.139 | -1.210 | -0.559 |
| C(12) | -1.718 | -1.393 | -0.217 |
| C(13) | -1.113 | -0.228 | 0.103  |
| C(14) | -2.159 | 0.930  | 0.132  |
| O(15) | -3.952 | -2.083 | -0.806 |
| C(16) | -2.575 | 1.256  | 1.590  |
| C(17) | -1.736 | 2.228  | -0.580 |
| H(18) | 0.131  | 0.371  | 2.524  |
| H(19) | 1.721  | 0.792  | 1.882  |
| H(20) | 0.334  | 1.810  | 1.509  |
| H(21) | 0.679  | -1.923 | 1.557  |



|       |        |        |        |
|-------|--------|--------|--------|
| H(22) | 0.722  | -2.175 | -0.174 |
| H(23) | 0.859  | -0.064 | -1.727 |
| H(24) | 0.771  | 1.553  | -1.040 |
| H(25) | 3.039  | -2.288 | 1.122  |
| H(26) | 5.202  | -1.386 | 0.544  |
| H(27) | 5.185  | -0.575 | -1.040 |
| H(28) | 5.193  | 0.389  | 0.422  |
| H(29) | -3.422 | 0.603  | -1.637 |
| H(30) | -4.344 | 0.553  | -0.135 |
| H(31) | -1.274 | -2.380 | -0.238 |
| H(32) | -1.765 | 1.701  | 2.170  |
| H(33) | -2.915 | 0.355  | 2.111  |
| H(34) | -3.404 | 1.972  | 1.579  |
| H(35) | -1.444 | 2.044  | -1.618 |
| H(36) | -2.583 | 2.923  | -0.594 |
| H(37) | -0.911 | 2.738  | -0.076 |

## References:

- (1) Goto, H.; Osawa, E.; *J. Am. Chem. Soc.* **1989**, *111*, 8950–8951.
- (2) Goto, H.; Osawa, E.; *J. Chem. Soc., Perkin Trans. 2*, **1993**, 187–198.
- (3) Frisch, M. J.; Trucks, G. W.; Schlegel, H. B.; Scuseria, G. E.; Robb, M. A.; Cheeseman, J. R.; Scalmani, G.; Barone, V.; Mennucci, B.; Petersson, G. A.; Nakatsuji, H.; Caricato, M.; Li, X.; Hratchian, H. P.; Izmaylov, A. F.; Bloino, J.; Zheng, G.; Sonnenberg, J. L.; Hada, M.; Ehara, M.; Toyota, K.; Fukuda, R.; Hasegawa, J.; Ishida, M.; Nakajima, T.; Honda, Y.; Kitao, O.; Nakai, H.; Vreven, T.; Montgomery, J. A., Jr.; Peralta, J. E.; Ogliaro, F.; Bearpark, M.; Heyd, J. J.; Brothers, E.; Kudin, K. N.; Staroverov, V. N.; Keith, T.; Kobayashi, R.; Normand, J.; Raghavachari, K.; Rendell, A.; Burant, J. C.; Iyengar, S. S.; Tomasi, J.; Cossi, M.; Rega, N.; Millam, J. M.; Klene, M.; Knox, J. E.; Cross, J. B.; Bakken, V.; Adamo, C.; Jaramillo, J.; Gomperts, R.; Stratmann, R. E.; Yazyev, O.; Austin, A. J.; Cammi, R.; Pomelli, C.; Ochterski, J. W.; Martin, R. L.; Morokuma, K.; Zakrzewski, V. G.; Voth, G. A.; Salvador, P.; Dannenberg, J. J.; Dapprich, S.; Daniels, A. D.; Farkas, O.; Foresman, J. B.; Ortiz, J. V.; Cioslowski, J.; and Fox, D. J.; *Gaussian 09*, Revision B.01, Gaussian, Inc., Wallingford CT, 2010.
- (4) Bruhn, T.; Schaumlöffel, A.; Hemberger, Y.; Bringmann, G. *Spec Dis*, version 1.71, University of Würzburg, Germany, 2012
